# Supplementary material for: Can Patients with Parkinson’s Disease Use Dry Powder Inhalers during Off Periods?
Source: PLoS One. 2015 Jul 14;10(7):e0132714. doi: 10.1371/journal.pone.0132714 (PMC4501550; doi:10.1371/journal.pone.0132714)
Supplement: S2 File — (XLS) [file pone.0132714.s002.xls]

## Sheet: All Parameters
	PIF (L/s)			PIF (L/min)			FIR (20-80%) (L/s2)			Time to PIF (s)			Inhaled Volume (L)			Total inhalation time (s)			80% Dwell time (s)			P.MIP (kPa)
Average	Resistance 1	Resistance 2	Resistance 3	Resistance 1	Resistance 2	Resistance 3	Resistance 1	Resistance 2	Resistance 3	Resistance 1	Resistance 2	Resistance 3	Resistance 1	Resistance 2	Resistance 3	Resistance 1	Resistance 2	Resistance 3	Resistance 1	Resistance 2	Resistance 3	Resistance 1	Resistance 2	Resistance 3
Par 01	0.6505	0.83	0.974167	39.05	49.8	58.45	0.936375	1.28956	2.92571	1.855	0.99	0.78	2.49143	2.70293	3.05661	4.74	4.055	3.665	3.715	2.305	3.255	5.975	6.0275	5.016
Par 03	0.604167	0.761667	1.01	36.25	45.7	60.6	0.57748	1.03892	1.98847	2.315	1.215	0.85	2.69543	2.83559	3.35739	5.51	5.565	4.875	4.225	3.19	1.48	5.154	5.07625	5.3928
Par 04	0.865	1.14833	1.525	51.9	68.9	91.5	1.4047	2.79687	5.38235	0.915	0.705	0.515	2.61767	3.05006	3.5305	4.045	4.11	3.54	1.99	1.35	1.18	10.6009	11.541	12.2841
Par 05	0.555	0.785	1.035	33.3	47.1	62.1	0.377397	1.54089	1.73912	2.475	1.055	1.095	1.82744	1.8232	2.39933	4.415	3.565	3.435	2.3625	1.11	1.105	4.36115	5.39595	5.6581
Par 06	0.4175	0.531667	0.69	25.05	31.9	41.4	N.A	N.A	N.A	1.43	1.4	0.855	1.33279	1.48909	2.00466	4.56	3.985	3.775	2.0175	1.65	2.085	2.49795	2.48115	2.51795
Par 07	0.66	0.825	1.12167	39.6	49.5	67.3	1.03532	1.17321	1.77157	1.1	1.295	1.42	2.40241	2.58924	3.0387	5.305	4.05	3.545	2.8425	2.785	2.0475	6.14525	5.9615	6.64448
Par 08	0.694167	0.948333	1.15583	41.65	56.9	69.35	2.38141	2.53043	3.30455	0.54	0.595	0.585	1.8176	2.15193	2.24602	3.535	3.205	2.815	1.5225	1.18	1.155	6.8125	7.869	7.063
Par 09	0.565	0.650833	0.8475	33.9	39.05	50.85	1.10128	1.04762	1.41552	0.72	1.445	0.845	1.70014	1.88122	2.27788	4.315	4.08	3.955	1.3725	1.825	1.185	4.524	3.7655	3.793
Par 10	0.6975	0.906667	1.25417	41.85	54.4	75.25	3.23512	3.52222	6.02	0.485	0.375	0.415	1.69317	1.75585	2.19529	3.435	2.925	2.745	0.985	0.7825	0.7325	6.86459	7.19308	11.683
Par 12	0.8883	1.08248	1.3725	53.3	64.95	82.35	1.585	2.35245	3.863	1.075	0.825	0.6	3.23595	3.1763	3.17165	5.86	4.905	3.785	1.7505	1.23275	1.1325	11.1335	10.255	9.945
Par 13	0.464167	0.490833	0.604167	27.85	29.45	36.25	1.00073	0.905833	1.11884	0.855	0.635	1.14	1.52179	1.45959	1.67724	4.175	3.795	3.39	2.16	1.835	2.6225	3.05435	2.1192	1.92805
Par 14	0.81	0.87	1.135	48.6	52.2	68.1	3.49834	4.03425	4.34856	0.435	0.34	0.49	2.17248	2.17605	2.66381	3.905	3.63	3.34	1.099	0.8705	1.2005	9.2595	6.64	6.81
Par 16	0.428333	0.429167	0.611667	25.7	25.75	36.7	0.614019	0.558251	1.11458	0.78	1.16	0.915	1.24483	1.29793	1.68055	3.865	0.429167	0.611667	1.6765	2.136	1.5965	2.59	1.615	1.995
Average	0.638433	0.789229	1.0259	38.3077	47.3538	61.5538	1.47893	1.89921	2.91602	1.15231	0.925769	0.808077	2.05793	2.18377	2.56151	4.43577	3.71532	3.34436	2.13219	1.71167	1.59823	6.07482	5.84155	6.21003
SD	0.154719	0.217654	0.282313	9.28356	13.0594	16.9388	1.02824	1.12329	1.68143	0.676137	0.375221	0.291423	0.596763	0.631917	0.621586	0.747334	1.19532	0.974426	0.964477	0.734689	0.716285	2.85265	2.98178	3.41622
Min	0.4175	0.429167	0.604167	25.05	25.75	36.25	0.377397	0.558251	1.11458	0.435	0.34	0.415	1.24483	1.29793	1.67724	3.435	0.429167	0.611667	0.985	0.7825	0.7325	2.49795	1.615	1.92805
Max	0.8883	1.14833	1.525	53.3	68.9	91.5	3.49834	4.03425	6.02	2.475	1.445	1.42	3.23595	3.1763	3.5305	5.86	5.565	4.875	4.225	3.19	3.255	11.1335	11.541	12.2841
N.A.= Not available.

## Sheet: General
PAR	Gender	Age (y)	Length (m)	Weight (kg)	Duration of Parkinson's disease (y)	UDPRS score			Kolom1	Kolom2	Kolom3	Kolom4	Kolom5
PAR01	Male	69	1.93	92	22	29
PAR03	Male	61	1.86	78	7	42				Male (n=7)		Female (n=6)
PAR04	Female	55	1.74	82	9	29				Mean	SD	Mean	SD
PAR05	Female	68	1.65	64	13	33			Age (y)	69.1429	7.71208	64.8333	5.91326
PAR06	Male	67	1.82	83	14	38			Height (m)	1.85857	0.0405909	1.705	0.0356371
PAR07	Male	59	1.89	91	17	38			Weight (kg)	79.1429	11.7676	73	13.2665
PAR08	Male	80	1.83	62	10	29			Time since diagnosis parkinson's disease	13.5714	5.06153	10.8333	4.40076
PAR09	Female	68	1.7	95	14	53			UPDRS score	35.4286	4.96176	35.1667	10.477
PAR10	Female	69	1.72	60	11	25
PAR12	Male	71	1.82	83	15	34
PAR13	Male	77	1.86	65	10	38
PAR14	Female	60	1.74	72	3	29
PAR16	Female	69	1.68	65	15	42
	Average	67.1538	1.78769	76.3077	12.3077	35.3077

## Sheet: Max delta p and PIF
			Pressure drop (kPa)
	Age	Gender	Resistance 1	Resistance 2	Resistance 3
PAR01	69	M	5.975	6.0275	5.016
PAR03	61	M	5.154	5.07625	5.3928
PAR04	55	F	10.6009	11.541	12.2841
PAR05	68	F	4.36115	5.39595	5.6581
PAR06	67	M	2.49795	2.48115	2.51795
PAR07	59	M	6.14525	5.9615	6.64448
PAR08	80	M	6.8125	7.869	7.063
PAR09	68	F	4.524	3.7655	3.793
PAR10	69	F	6.86459	7.19308	11.683
PAR12	71	M	11.1335	10.255	9.945
PAR13	77	M	3.05435	2.1192	1.92805
PAR14	60	F	9.2595	6.64	6.81
PAR16	69	F	2.59	1.615	1.995

## Sheet: Inhalation flow curves
	Resistance 1																													Resistance 2
Time	Par01	Par01_2	Par03	Par03_2	Par04	Par04_2	Par05	Par05_2	Par06	Par06_2	Par07	Par07_2	Par08	Par08_2	Par09	Par09_2	Par10	Par10_2	Par12_1	Par12_2	Par13_1	Par13_2	Par14_1	Par14_2	Par 16_1	Par 16_2	Average	Max	Pressure drop	Par01	Par01_2	Par03	Par03_2	Par04	Par04_2	Par05	Par05_2	Par06	Par06_2	Par07	Par07_2	Par08	Par08_2	Par09	Par09_2	Par10	Par10_2	Par12_1	Par12_2
0	5	4.9	4.8	5.1	5.1	5.2	5.3	5.2	5.4	5.3	5.2	5.4	5.1	5.2	5.2	5.1	5	5	5	5.4	5.1	5.2	5.5	5.7	6.7	7.2	5.31923	7.2	0.110878	6.4	6.1	6.2	6.2	6.2	6.6	6.2	9.3	8.4	6.6	6.4	7.2	6.5	6.5	9.3	7.4	6.1	6.4	6.3	6.1
0.01	5.8	5.8	5.2	5.8	7.3	6.5	7.3	5.8	5.8	6.4	5.5	6.7	5.5	6.5	5.7	5.2	9	9	5.1	5.8	6.2	5.5	8.9	7.3	7.4	7.3	6.47308	9	0.164199	6.8	7.4	6.3	6.9	6.9	8.4	6.9	9.5	9.4	6.8	7.5	7.8	8.1	7.9	10.2	8.9	10.5	7.3	6.5	6.3
0.02	6.7	6.4	6.5	5.4	7.1	6.5	7.3	7.1	6.3	6.5	6.5	6.5	6.6	7.4	6.3	5.8	11.2	12.5	6.5	6.3	6.5	6.7	22.2	5.8	7.4	8	7.61538	22.2	0.227265	8.1	9.2	7.1	7	7	11.5	8.1	9.5	9.4	7	7.1	7.9	8.1	9.2	11.4	9.3	13.4	8.4	7.1	9.3
0.03	6.3	6.3	6.6	5.4	8.2	9.1	7.4	7.3	6.5	6.6	7.3	7.4	5.7	7.1	6.7	6.4	14.5	15.9	6.4	6.4	5.6	5.9	26.8	9.8	8.1	9	8.41154	26.8	0.277268	8.5	10.4	6.6	8.1	11.6	16.4	6.5	10.6	9.3	8.1	9.5	8.1	8.2	11.3	13.3	9.3	17	9.2	6.9	10.2
0.04	6.5	7.3	6.6	5.5	10.4	11.4	7.4	7.3	6.7	7.1	8.2	7.3	6.4	8.2	7.4	6.8	17.6	19.1	6.5	6.4	5.6	6.5	28.8	26.8	7.3	9.8	9.80385	28.8	0.376653	9.4	12.5	8.3	7	17.2	20.1	9.2	11.5	9.4	7.1	9.3	8.6	8.4	12.5	13.2	10.3	19.6	10.4	7.7	12.5
0.05	6.5	7.4	7.3	5.3	12.4	13.3	7.4	7.3	6.3	6.5	9.2	7.2	6.5	8.9	9	8.1	19.9	21.8	7	6.5	5.9	6	30.2	26.8	8.2	10.5	10.4385	30.2	0.426994	9.5	14.9	8.1	7.9	19.1	22.9	9.2	11.5	9.3	7.7	9.4	9.2	9.3	14.1	13.3	10.4	22.9	14.1	7.6	13.3
0.06	6.3	7.8	7.9	6.1	13.9	14.5	7.5	6.5	6.4	7.3	10.6	7.4	7.4	11.2	10.5	8.3	22.9	24.3	6.4	7	7.3	7.4	31.8	27.8	8.2	10.6	11.2808	31.8	0.498685	9.5	17.1	8.2	7.6	20.9	26.2	9.3	10.4	9.3	8.3	9.3	9.4	9.3	16.5	15	12.5	26.9	17.2	6.6	15
0.07	6.8	8.1	9	5.7	16.4	15.4	8.4	7.3	6.3	7.1	10.4	7.3	7.4	12.3	11.8	9.1	24.8	26.6	7.3	7.3	7.3	7.3	32.7	29	8.2	11.8	11.9654	32.7	0.561051	11.4	19.6	9.2	6.6	22.9	27.6	10.5	13.3	9.4	8	9.5	9.7	10.6	17.8	15	12.4	29	19.6	7.8	17.3
0.08	7.2	8.4	8.3	6.5	18.8	16.7	9.1	7.3	6.4	7.3	10.5	7.2	8.3	13.9	12.5	9.9	26.6	27.1	7.2	7.3	7.3	8.2	33.3	29.9	9.6	11.1	12.5346	33.3	0.615702	13.4	21.2	9.3	7	23.3	29.9	10.5	13.4	9.5	8.1	9.5	11.6	10.6	19	15.9	14.2	28.7	23.3	8.1	18.5
0.09	7.4	9.9	10.5	5.8	20.6	17	8.3	7.3	6.3	8.2	12.4	8.1	9.1	15.8	14	9.8	28	28.8	7.3	7.4	8.2	8.2	34.2	31.1	9.4	11.8	13.2654	34.2	0.689586	14.1	24.3	9.5	7.4	25.7	34.2	12.5	13.4	9.4	7.1	9.5	13.4	13.5	20.3	15	14.9	33	27	9.2	19.7
0.1	7.3	10.5	10.6	6.8	22.7	18.4	8.3	7.3	6.3	9	13	7.6	10.4	17.2	14.5	11.1	29.9	30.4	9	9	8.2	9.1	34.9	31.7	9.1	12.4	14.0269	34.9	0.771034	15	27.1	11.7	7.3	28.3	36	12.5	14.3	9.3	8.5	9.3	14.4	14.9	21.9	17.2	17.2	34.4	30.5	9.3	21.9
0.11	9.8	11.2	11.7	6.6	23.4	20	9.1	8.2	6.4	9.1	13.9	9.1	11.2	19	15.8	12.4	31.1	31.5	9.8	9.8	8.7	9.8	36.4	33.6	9.4	13	15	36.4	0.881721	14.9	28.3	13.3	7.3	31.4	36.1	13.3	15.7	10.5	9.3	9.4	15.2	17.1	24.3	17.8	17.1	37.9	32.8	9.4	24.3
0.12	9.7	10.4	12.9	5.8	24	21.2	8.2	10.6	7.2	8.9	15.8	10.5	13.4	20.2	16.4	13.4	32.6	31.8	10.5	9.8	8.4	10.5	37	34.1	10.5	13.6	15.6692	37	0.962153	17.2	29.9	14.1	6.6	31.9	35.1	14.5	16.5	10.4	9.2	9.3	16.4	18.4	24.9	17.9	17.2	38.3	34.7	10.7	25.2
0.13	10.5	11.7	13.3	7.3	24.2	22.8	7.4	11.8	6.5	10.5	17.3	11.2	16	22.3	17.7	14.5	33	32.3	11.8	10.4	9.5	11.7	37.3	36.2	10.6	13.5	16.5885	37.3	1.07835	18.5	31.7	15.8	6.5	32	40.9	15.7	18.6	9.2	9.4	9.2	17.3	21.4	27.5	18.9	17.8	38.5	37.9	11.5	26.1
0.14	11.1	11.8	14.5	7.3	25.3	24.3	8.2	12.4	6.3	11.2	18.1	11.8	18.2	23.8	18	15.8	33.4	33.2	12.8	11.1	9.3	13	38	37.6	10.5	13.5	17.3269	38	1.1765	18.4	32.3	17	7	35.2	42.8	17.4	20.3	9.4	9.6	10.6	18.5	22.9	29.8	17.7	19.7	41.6	38.8	14.1	29.1
0.15	12.3	11.8	14.9	8.2	27.3	25.1	7.3	13.5	7.3	11.8	19.9	13.5	19.9	25.8	18.3	17.2	34.5	34.1	14.5	11.7	9.1	13.5	38.4	38	10.5	13.4	18.1462	38.4	1.29038	20.8	33.7	17	6.9	37.1	43.9	18	22.4	9.2	12.5	10.6	19.7	25.2	30.9	18.9	19.7	41.1	39.7	15.2	30.1
0.16	13.2	12.4	15.9	9	27.2	26.8	8.3	14	7.2	12.4	21.1	14.5	21.8	27	19.4	17.9	34.2	33.9	15.9	12.9	9.9	14.3	39.4	39.3	11.7	13.5	18.9654	39.4	1.40952	21.8	36.3	17.8	7.1	39.9	40.4	20.2	22.3	9.1	12.5	12.2	20.9	27.4	33	19.7	19.6	41.4	42.1	16.4	32.7
0.17	14.4	12.9	15.9	10.5	29	27.3	7.2	14.5	6.5	13.5	21.6	15.9	23.9	27.9	19	19.1	35.8	35.4	18.1	14.5	10.4	15.6	40.9	39.4	11.8	14.5	19.8269	40.9	1.54049	23	37.2	19.6	7.5	40.2	47	20.8	22.4	10.2	11.6	13.3	22.3	29.5	33.4	21.3	20.8	43.7	41.8	18.5	30.2
0.18	14.9	13.5	17.6	10.5	29.7	27.2	8.3	15.4	7.4	14.5	22.3	16.3	25.6	29.4	19.5	19.8	36.4	35.5	19.1	14.9	10.5	15.9	41.9	40.4	13	14.6	20.5423	41.9	1.65366	24.3	36.3	21.9	7.2	40.8	48.4	21.9	23.4	9.4	11.6	14	23.9	31.5	37.2	21.5	19.7	42.5	45.3	20.5	33.6
0.19	16	13.5	18	10.5	30	28.8	8.2	15.5	6.5	15.5	22.5	17.2	26.5	29.7	19.4	21.2	35.3	35.5	20.5	16.3	11.7	17.2	42.3	41.2	14	14.5	21.0577	42.3	1.73768	26.3	36.7	23	7.8	38.5	47.9	23	24.4	9.8	14.2	15	24.4	32.6	38.7	21.7	20.8	43.4	44.5	21.9	37.2
0.2	16.7	14	17.9	11.1	30.4	30.6	9.1	16.8	7.1	16.5	23.4	17.5	28	30.8	19.5	21.8	37.2	36.3	21.8	17.7	12.9	17.5	42.9	41.5	14.6	15	21.8692	42.9	1.8742	26.5	37.3	23.4	8.4	41.8	47.9	24.3	25.3	9.4	13.5	16.4	26.2	33.9	39.6	21.8	21	45.8	47.2	21.8	36.2
0.21	17.6	14.5	18	11.8	31.7	30.8	9.8	17.3	6.4	17.3	23.4	18	27.9	32.1	19.8	22.8	37.8	37.4	23.5	19.1	13.4	18.4	42.8	42	14.6	15.5	22.45	42.8	1.97506	26.9	40.7	25.2	8.3	45.7	50.9	25.2	26.1	9.8	14.2	17.8	26.9	36.7	39.7	22.1	23.2	45.1	47.6	23.4	38.1
0.22	18	14.5	19.1	11.7	31.5	31.7	10.9	17.7	6.6	18	24	19.2	29.7	32.8	19.5	23.6	37.7	36.3	24.2	20.9	15.4	19.5	43.8	42.6	15.5	15.8	23.0846	43.8	2.08831	28.3	39.1	26.9	8.2	47.2	53.2	26.1	26.2	9.4	15.1	19.7	28.3	37.5	42.1	23.2	23	49.9	46.7	26.6	37.4
0.23	19	14.9	19	11.2	32.2	33.9	10.4	18	6.6	19.1	25.3	19.5	30.4	34.1	20.1	25.1	37.7	37.2	25.7	21.5	15.8	19.8	44.5	42.6	16.3	15.8	23.6808	44.5	2.19756	30.2	41	27.5	7.2	47.5	54.1	27.7	26.7	9.2	15	20.8	29.1	37	43.5	24.4	23.1	49.9	47.3	27.4	39.4
0.24	20.2	15	19	12.4	31.5	35.2	11.8	18	6.5	20.5	26.4	19.6	32	35.3	20.4	25.4	37.5	37.7	26	22.5	17.1	21.2	45	43.8	15.9	15.8	24.2962	45	2.31326	32	42.9	27	8.1	49	55.6	27.9	27	9.5	16.5	21.9	30.2	36.9	42.9	24.3	24.3	47.4	46.3	29.8	42.5
0.25	20.8	14.9	19.7	11.8	32.2	35.3	11.7	19.1	6.5	21.1	26.8	19.8	32.6	35.5	20.3	26.2	38.4	37.3	27.8	24.6	17.1	20.9	45.4	43.7	17.2	15.9	24.7154	45.4	2.39378	32.4	44.3	26.9	9	47.9	56.6	28.4	27.9	9.3	16.4	23.4	30	40.4	46	25.8	25	50.3	49	31.9	40.7
0.26	21.5	15.8	19.8	12.3	33.3	36.2	12.4	19.2	6.3	21.2	27.2	21.3	32.2	36.4	21	26.7	37.7	38.1	28.8	25.9	17.6	21.6	44.6	44.5	17.3	17.2	25.2346	44.6	2.49541	34.2	45.3	29	8.3	51.8	58.5	28.4	28.6	9.2	17.1	24	31.4	40.6	47.3	26.4	25.2	49.7	49	33.7	43
0.27	22.5	15.8	19.8	12.9	33.7	36.7	12.9	18.8	7.3	21.9	28.3	21.5	33	37.5	21	27.5	38.3	38.3	29.9	27.2	19.1	21.9	45.7	44.1	18.4	17.2	25.8154	45.7	2.6116	32.4	43.5	29.8	8.4	51.3	57.5	29	29	9.4	17.2	25	32.1	42	45.9	25.3	26.6	52.2	49.9	35.6	45.6
0.28	22.6	15.8	21.2	13.5	34.7	38.7	12.4	19.6	7.3	23.1	29.4	21.2	33.5	38.1	20.3	28	38.6	38.6	31.1	28.5	20.6	22.5	45.9	44.6	18.1	17.2	26.35	45.9	2.72088	33	45.6	30.6	9.2	51.2	55.4	30.2	28.7	10.4	17.8	27	33.1	43.6	49.4	25.7	27.4	50.5	50.7	37.2	45.9
0.29	24	15.8	21.2	14.5	34.2	39.2	13.4	19.5	6.8	23.1	30.1	22.9	34.9	38.1	21.6	28.1	38.4	39.4	31.5	29.3	20.2	22.7	46.2	44.9	18.8	17.2	26.7692	46.2	2.80815	33.6	44.5	30.9	9.5	53.9	60.2	27.8	29.9	10.5	18.4	28.3	34.1	42.7	46.8	27.4	27	48.9	50.5	39	45
0.3	24.6	15.8	21.5	14.5	35.1	39.5	11.7	19.1	6.9	24.3	29.9	22.8	35.3	39	21.6	28.6	39	40.5	32.2	30.6	21.6	23.1	45.4	45.3	19.1	17.5	27.0962	45.4	2.87716	36.3	46.9	31.6	10.6	50.1	59	30.2	29.9	10.6	19	27	35.1	44.2	47.1	28.2	27.5	51.1	50.9	41.6	47.3
0.31	25.1	16.7	21.6	15.3	34.9	39.4	11.8	19.1	6.4	24	30.7	22.6	35.3	40.1	21.8	29.2	39.6	39.8	33.1	31.7	22.8	23.4	45.7	45.6	19.9	18	27.4462	45.7	2.95197	37.2	46.4	33	12.4	53.3	61.4	30.6	30.6	10.8	19.6	29	31.7	45.3	49.7	28.6	28.7	51.7	51	42.8	46
0.32	26.2	17.1	21.9	15.6	36	41.1	11.7	19.8	6.9	24.7	31.1	23.7	35.2	40.5	21.9	29.2	39.3	40.1	33.8	33.9	22.6	24.2	45.3	45.2	19.9	19.1	27.9231	45.3	3.05545	37.3	47.1	33	13.3	55	58.9	31.3	29.4	10.6	20.2	30.2	34.6	47.9	50.6	27.1	30.5	52.8	48.8	42.7	47
0.33	26.8	17.4	21.1	15.9	35.6	41.8	11.7	19.8	6.6	25.1	30.7	24.1	35.5	40.3	22.3	30.7	39	40.5	35.2	33.4	23.1	23.4	45.8	46.7	19.9	18.8	28.1231	46.7	3.09938	37.3	43.7	31.4	13.2	52.6	62.3	31.4	31.6	10.6	20.2	31.4	35.6	47.5	52.4	27.9	29.8	50.7	51.9	43.5	48.7
0.34	27	17.3	21.9	15.9	35.7	41.4	12.4	19.5	7.5	25.7	31.5	23.8	35.7	41	22.5	30.9	39.5	40.4	35	34.7	23.1	24.6	45.9	46.9	20.5	18.8	28.4269	46.9	3.16671	35.4	47.8	33.7	14.2	56	59.2	29.8	32.3	10.6	20.2	33.1	34.7	50.8	50.1	27.9	29.9	52.2	50.8	45	52
0.35	27.8	17.2	22.2	16.7	36.4	42.8	11.7	19.9	7.4	26	32	24.8	36	41	21.8	30.9	39.4	41	35	36.2	23.4	24.6	46.2	46.8	20.5	18.8	28.7115	46.8	3.23044	36.7	42	34.9	16	58.5	64.3	33	31.3	12.5	21.8	31.4	35.8	49.4	52	27.9	31	50.3	52.8	45.8	51.4
0.36	26.9	17.7	22.5	16.8	37.3	44.1	11.7	20.2	7.4	26.2	32.2	24.6	36.3	41.6	23.5	31.6	39.1	40.5	36.5	36.4	24	24	45.8	46.9	21.2	18.8	28.9923	46.9	3.29393	37.8	47.1	34.7	16.1	56.2	61.3	32	32.7	12.6	21.5	33.5	34	51.5	49.9	30.2	31.4	52.2	52.7	48.5	50.2
0.37	28.3	18.1	22.9	17.3	36.9	43.9	11.8	20.9	7.3	26	33.1	24.3	36.5	42.6	23.4	32.1	39.4	40.5	36.2	37.3	23.9	24.6	45.3	47.8	21.2	18.2	29.2231	47.8	3.34657	39.7	48.8	35.3	17.2	55	61.8	32	34.2	11.5	22.3	33.7	37.5	51	52.3	29.1	33	51.5	54	51.4	52.3
0.38	29	18	22.8	17.2	36.7	44.9	11.8	21.2	7.3	26.2	33.4	25.1	37.1	41.2	23.4	32.2	39.9	40.9	38.1	38.7	24.6	24.3	46.6	47.8	21.8	19.1	29.5885	47.8	3.43078	40.1	46.7	36.6	18.6	58	63.3	33	30.1	12.6	21.8	33.5	37.9	52.5	52.2	28.7	32.8	54.8	48.9	48.8	48.3
0.39	29.7	18.6	23.4	17.2	36.9	44	11.8	21.6	7.4	26.4	32.9	25.8	37	42	24.9	32.6	40.1	41	37.7	38.4	24.5	24.6	46.5	47.4	21.8	19.8	29.7692	47.4	3.47283	40.3	46.6	35.6	17.7	61.1	62.4	32.3	31.3	12.5	22.9	33	37.2	51.6	51.5	27.8	34.1	52.7	52.2	52.4	53.5
0.4	29.7	19	24	17.5	36.9	45.4	12.5	21.2	7.2	26.4	32.2	25.3	37.1	43.1	24	33.5	41	41.3	38.9	40.1	24.6	25	46.5	48.8	22.8	19.1	30.1192	48.8	3.55497	39.6	45.2	36.9	19.1	58.9	64.4	33	32.6	12.6	23.1	35.6	36.3	53.7	52.3	29.3	33.7	52.8	48.5	52.4	53.9
0.41	30.2	19.5	24	17.9	37.5	46.2	12.5	22.5	7.3	26.9	33.7	25.9	37.5	42.6	25.1	32.8	40.4	41.6	39	41	25.1	24.5	47.3	48.5	22.2	18.7	30.4	48.5	3.62156	40.4	45	35.8	20.2	56.7	65.7	34.7	34.1	13.3	21.8	37.3	37.3	54	55.6	28.6	34.7	51	48.7	53.2	55.1
0.42	30.6	19.8	23.5	19.1	37.7	46.5	12.9	22.8	7.3	26.7	34.2	26	37.6	43.5	25.4	33.4	40	41.4	39.1	41.9	25.1	25.4	47.6	47.9	23.5	19.1	30.6923	47.9	3.69154	40.1	47.7	35.9	21.9	58.6	62.9	33.7	34.7	13.3	24.4	37.9	38.1	53.9	52.2	27.8	33.4	53.3	51.5	52.6	56.2
0.43	31.1	19.5	23.7	19	38.3	47.3	12.5	23.5	9.1	27.2	33	26	37.5	43.4	25.7	34.7	40.4	41.1	39.1	41.3	25.2	25.1	47	49.1	23.1	19.1	30.8462	49.1	3.72864	40.2	49.7	37.2	21.9	59.2	65.4	36.3	34.2	13.3	24.3	36.3	38.6	52.4	55.7	27.8	35.6	51.6	53	55.4	54.5
0.44	31.1	20.2	23.7	19.1	38.4	47.1	12.9	23.5	7.4	27.2	34.8	26.2	37.6	42.8	26.5	35.1	40.7	41.8	40.6	43.2	24.9	24.6	47.1	49.5	23.4	19.2	31.1	49.5	3.79026	40.9	44.8	37	23	59.5	66	33.7	36	13.3	25.2	36.7	39.7	52.1	54.5	28.3	37	50.6	50.8	55.8	54.9
0.45	31.1	20.9	24.7	19.8	38.5	47	13.5	24.8	8.1	27.3	35.2	27	37.1	42.4	26.4	34.8	40.9	40.9	41.1	43.1	25.1	25.1	46.3	49.6	23.5	19.2	31.2846	49.6	3.8354	41	48	36.7	23.9	56.7	63.5	36	36.1	14.3	25.8	37.5	40.5	53.4	53.5	27.5	37.3	53.9	54	53.9	54.8
0.46	31.5	21.5	24.6	20.2	40.2	48.2	12.5	25.1	7.3	27.3	34.5	27	36.7	43.6	26.8	35.2	39.6	41.3	41	44.1	24.2	25.4	46.1	49.1	23.2	19.1	31.3577	49.1	3.85334	43	49	37.9	23.9	61.7	63.4	36.3	34.4	14.3	25.7	37.9	39.1	55	53.3	27.8	35.4	53.4	50.8	54.7	56.2
0.47	31.8	21.8	25.1	20.5	39	48.1	13.4	25.9	7.2	26.4	35.4	27.8	37.6	43.2	26.9	35.6	40.8	42.4	41.4	44.6	25.2	25.2	46.2	48.6	23.6	20.2	31.6885	48.6	3.93506	40.4	49.4	36.3	23.9	59.9	67.3	36.4	35.7	15	25	37.4	41.5	54.3	56.6	29.7	35	52.5	53.3	58.8	54.6
0.48	31.7	23.1	25.7	21.2	38.7	48.2	13.5	25.9	7.3	26.4	35.3	27.5	39.1	43	27.2	33.5	40.6	41.3	42.1	45.2	25.1	25.2	46.6	48.8	23.6	19.9	31.7577	48.8	3.95227	39.9	45.8	37.3	23.9	58.4	65.4	37.3	36.2	15	27.1	37.7	42.1	53.3	56.4	29	35.4	54.3	49.7	57.6	56
0.49	32.1	23.1	25.9	21.6	40.1	49	13	25.9	7.3	27.3	36	28.3	39.1	43.2	28.5	36	40.6	41.6	42.2	45.9	25.2	25.9	46.5	48.4	24.1	20.5	32.2038	49	4.0641	42.3	48.2	39.5	24.3	62.2	62.9	36.5	34.6	15.1	27	39.2	41.5	55.1	55.6	29.8	37.2	53.7	50.1	60.4	56.4
0.5	33	23.4	25.7	21.9	40.1	49.8	12.9	26.4	7.4	27.3	35.8	29.3	37.3	42.7	28.2	35.6	41.3	41.8	42.6	46.2	24.9	25.1	46.3	48.2	24.2	20.5	32.2269	49.8	4.06992	43.5	48.7	39.2	25	61.8	65.6	35.1	35.7	15.9	25.3	38.8	40.2	54.1	55.6	29	38.3	54.8	50.4	60.3	55.5
0.51	33.4	24.3	26	22.5	40	49.7	12.8	26.8	7.3	26.2	36.4	29	38	43.5	28.5	36	40.5	41.7	44.1	46.6	25.2	25.2	46.7	49.6	24.2	20.2	32.4769	49.7	4.13331	44.4	47.5	39.4	24.8	62.2	67.1	36	33.7	16.8	27.8	39.9	41.3	56.2	56.7	28.3	35.4	52.2	49.9	56.2	59
0.52	33.3	24	25.9	22.8	40.9	50	13.5	26.8	7.4	27.8	36	29	38	43.2	28.7	36.2	40.7	41.2	43.5	46.8	24.6	25.2	45.4	49.1	24.7	19.8	32.4808	50	4.13429	42.6	47.5	40.8	25.2	65.8	68.8	36.8	36.4	16	27.9	40.2	40.4	56.6	54.5	27.4	38.1	49.7	51.1	59.4	56
0.53	33.2	25.1	25.7	23.7	41.3	49.7	13.4	26.7	8.2	27.3	36	30.2	38.2	42.8	28.3	35.2	40.3	41.2	44.6	46.8	25.2	24.6	45.4	48	24.6	20.6	32.55	49.7	4.15194	43.7	48.3	42.1	24.9	64	66.3	37.5	35.5	16.9	28.7	41.6	40.5	54.5	55	30.6	37.2	49.1	51.1	58.4	57
0.54	32.8	26.3	25.9	23.4	41.1	50.4	13.5	26.8	8.2	27.3	36.4	29.7	38.8	43.5	28.5	35.3	39.5	41.3	44.5	47.5	25.7	24.5	46.2	47.5	24.6	21	32.7	50.4	4.19029	42.6	50.1	36.8	24.3	62.2	67.3	38.2	34.7	17.2	29.8	40.3	42.7	53.5	56.1	29.8	37.2	53.4	50.9	59.9	56.2
0.55	32.5	26.8	27	25.2	41.7	51	13.5	26.6	7.3	26.3	36.1	30.2	38.4	43.3	29.7	34.5	39.7	41.8	44.8	48.7	25.9	24.7	46.5	47.4	24.2	20.9	32.8731	51	4.23477	44.6	49.9	40.8	26.2	62.5	67.7	41.1	35.9	17.2	29.4	40.4	43.5	52.6	55.4	30.1	39.4	52.1	52	59.9	60.7
0.56	32.5	27.4	26.4	25.1	42.3	51.2	13.5	27.3	7.3	27	36.7	31.1	38.8	42.6	29.2	33.5	40.7	40.3	45	48.3	25.7	24.7	46.1	47.6	24.6	20.9	32.9154	51.2	4.24567	42.4	47	41	27	64	69.5	40.6	36.4	17.3	29.9	41.5	40.2	54.7	56.1	29.9	39	50.4	50.1	60.9	60.3
0.57	34.1	27.2	26	25.4	42.2	49.7	13.9	27	7.2	27.2	36.3	31.1	38.5	42.7	29.8	34.5	40.8	42	46	48.1	25.2	24.6	45.7	47.3	24.7	21.2	33.0154	49.7	4.27151	41	47.3	41	27.1	61.7	67.3	42	36.8	17.9	29.9	38.6	41.8	54.8	53.9	29	36.5	52.6	48.8	61.9	60.4
0.58	33.2	28.7	26.8	25.9	42.8	51.3	14.6	26	7.3	26.5	36.3	30.4	38.4	42.5	30.2	34.7	40.9	42.3	45.8	48	25.9	23.9	45.4	46.9	23.4	21.2	33.05	51.3	4.28047	41.2	46.2	40.5	27.8	62.6	69.5	42.1	37.8	18.6	29	41.3	42.9	54.2	55.4	30.6	40.1	51.9	49.5	63.3	57.6
0.59	33.5	29.2	27	26.4	42.3	51.8	14.5	27.2	7.4	27.5	35.9	31.8	38.6	42.6	29.8	35.4	40.8	41.9	45.9	49.1	25.9	24.6	45.9	45.8	24.3	20.5	33.2923	51.8	4.34347	41.5	48	41.8	28.7	65.1	68.9	41	34.7	17.9	31.4	44.3	42.6	56.4	55	30.3	41.1	52	48.8	61.4	60.7
0.6	33.7	29.7	26.7	26.5	42.9	51	14.5	26.9	7.3	27.5	36.8	31.6	38.4	43.5	29.9	34.7	40.4	41.6	46.9	49.1	25.9	24.6	45	47.2	24.8	20.9	33.3846	51	4.36759	42.7	44	42.7	29.8	65	63.6	41.3	35.5	17.7	29.8	39.9	40.5	55	54.7	28.9	42.1	51.7	49.4	60.7	61.4
0.61	33.2	30.2	26.5	27.2	43.1	51.8	14.9	26	7.3	26.8	37.1	32.5	38	42.2	29.8	34.2	40.5	41.3	47.2	49.6	26	24.8	44.8	45.4	24.7	21.5	33.3308	51.8	4.35351	40.5	47.5	42.5	30.1	62.8	64.8	41.5	37.6	18.5	31.3	43.3	41.8	53.8	55.8	27.9	39.8	50.9	50.1	61.9	61.1
0.62	34.2	29.9	26.7	27.2	43.9	52.4	14.6	27	7.3	26.4	37.3	32.3	39.7	42.2	29.7	34.2	40.1	41.5	47	49.9	26.2	24.6	46	45.1	24.3	21.2	33.4962	52.4	4.39682	44.2	46.2	40.4	28.3	64.8	67.1	39.6	37.9	19.6	30.5	42.5	40.6	53.9	54.1	27.4	41.8	52.1	49.5	63.7	62.5
0.63	34.5	31.2	26.9	27.4	43.5	52.4	14.6	27.2	7.4	26.8	37	32.2	39	41.3	30.7	33	40.3	41.8	48.1	50	26.3	24.6	44.8	46.1	25.1	21.2	33.5923	52.4	4.4221	44.9	47	39.2	29.3	67.8	66.3	40.2	36.9	19.7	30.2	40.9	42.2	53.1	53.9	28.3	41.8	53.1	49.1	59.4	62.8
0.64	35.1	31.2	27.2	28.3	43.8	51.6	14.9	27	7.3	27.8	37.2	32.6	39.2	42.3	29.4	33.3	41	41.7	48.3	49.9	26.8	24.3	45.2	45	24.6	21.6	33.7154	51.6	4.45456	43.5	46.5	40.7	31.6	64.1	68.5	41.4	37.5	20.3	29.9	40.7	45.7	55.4	53.5	29.3	40.7	54.1	46.7	61.5	61.8
0.65	34.6	31.7	27.7	28	43.5	52.6	15.8	27.3	7.4	26.3	37.4	32.8	39.1	42.3	31.1	32.8	40.1	41.5	48	50.7	27.3	24.9	45.1	44.7	24.7	21.2	33.7923	52.6	4.47491	43.5	43.8	39.8	32	65.9	69.4	41	38	20.2	31	42.1	39.8	55.3	57	29	39	52.3	49.8	60.8	62.8
0.66	34.8	31.7	27	28.4	43.7	51.7	16	27.8	7.4	27.8	37.9	33	38.4	41.8	30.3	33.2	39.7	41.5	48.4	51.3	27.3	23.4	44.7	44.6	25.2	21.6	33.7923	51.7	4.47491	45.2	46	44	32.4	66.7	68.5	41.4	38.8	19	30.9	43.5	42.8	53.6	54.5	29	39.8	50.3	50.4	62	65.8
0.67	34.3	32.8	26.8	28.4	44.8	52.7	15.9	28	7.5	27.3	38.1	32.6	39.2	41.1	30.4	33	40.1	41.3	48.5	51.8	26.5	25.1	45.5	44.8	24.7	21.8	33.9615	52.7	4.51984	46.4	47.7	41.1	31.2	62.9	68.8	42.6	40.4	20.8	29.8	42.9	44.5	52.5	57.2	29	38.3	52.4	49.7	62.6	61.9
0.68	35.1	32.4	26.4	28.8	44.2	52.8	16.5	28.5	7.4	27.5	38.1	34	39	41.8	30.7	32.2	40.2	40.5	47.9	51.3	27	24.9	44.9	44	25.2	22.5	33.9923	52.8	4.52804	44.4	46.6	42.4	31.3	66	66.1	39.3	37.5	20.3	30.6	43.7	45	52.9	56.4	27.8	40.5	53.3	48.2	61.8	61
0.69	34.8	33.7	26.3	29.2	44.1	52.3	16.3	28.3	7.3	28.2	38.1	34.5	39	42	29.8	32.2	40	41.8	49.2	52.4	27.2	24.7	45.5	44.8	24	22	34.1423	52.4	4.56809	46.1	46.1	43.1	33.8	65.8	68.6	42.1	37.9	20.9	31.3	42.7	44.4	54.3	56.2	27.9	41.9	52.5	49.9	63.9	61.2
0.7	34.5	33.6	27.2	29.7	45.1	52.1	16.4	29	7.4	27.3	37.4	34.1	39	41.3	29.7	31.3	40.2	41.3	48.8	51	27.3	24.7	45.2	44.6	24	23.2	34.0538	52.1	4.54445	45.3	43.3	44.7	33.4	66.4	68.9	43.6	37.2	20.3	31.7	42.1	43.1	53	55.6	27.9	39.1	51	49.7	58.7	62.7
0.71	34.8	34.4	27.1	30.1	44.6	52.3	16.4	28	7.4	28	38.1	34.5	38.4	41.3	30.4	31.4	40.4	41.1	48.2	51.3	27.8	24.7	44.9	44.9	24	23.4	34.15	52.3	4.57015	45.9	44.7	40.4	33.4	64.6	68.7	41.8	37.9	20.2	29.6	44.3	44.4	51.8	55.7	28.7	41.9	49.4	49.9	61	61.6
0.72	34.1	34.2	27.3	30.5	45.1	53.2	15.9	28.5	7.4	27.7	38.1	35.4	39	40.7	29.9	31.2	40.5	40.4	49.2	51.6	26.8	24.7	43.9	44.3	22.8	22.8	34.0462	53.2	4.54239	44.2	43.3	44.5	30.9	64.2	64.2	42.1	40.5	21.4	32.6	43.2	44.2	54.2	53.3	29.3	42.1	51.4	50.5	61.9	62.9
0.73	34.5	35	28	30.8	46.1	53.7	16.4	29	6.6	27.2	38.4	35.4	38.5	41.3	30.7	29.8	39.9	40.4	48.4	51.4	27.2	24.6	44	44.4	23.4	23.5	34.1769	53.7	4.57735	45.3	45.3	40.7	32.1	63.4	68.3	41.8	38.5	19.7	31.7	43.2	44.3	52.1	55.5	29.8	42.5	49.2	47	61.6	62.3
0.74	34.5	35.2	27.9	31.7	45.8	53.5	16	29	7.4	26.8	38.3	36	38.6	41.4	31.2	30.9	40.3	40.4	48.5	51.3	27	24	44.6	46.3	23.2	23.9	34.3731	53.5	4.63005	42.1	45.9	42.6	32.1	66.2	68.3	40.9	36.9	21.8	30.2	39.6	45.8	54.2	52.9	28.3	41.6	49.5	48.3	60.2	63.1
0.75	34.6	34.3	27.8	31.1	46.2	53	17.2	29.7	7.1	27.2	38.3	35.3	39	41.3	30.7	29.9	39.4	40.5	49.4	52.5	27.8	23.6	44.9	44.9	22.8	24.4	34.3423	53	4.62176	44.5	43.5	43.5	32.6	60.9	65.4	41	42.1	22.4	33	41.3	42.4	55.4	56.8	29.5	40.5	49.8	47.8	62.5	63.4
0.76	33.5	35.2	27.8	31.4	46.2	54	16.4	29.4	7	27.3	39	36.1	38.8	40.9	30.6	30.7	39.7	40.6	50.3	51.8	28	24.3	45.2	44.9	23.4	23	34.4423	54	4.64872	43.5	44	43.5	34.9	64.8	65.8	42.1	41.8	21.9	33.1	44.8	44.8	55.4	55	29.4	40.9	52.4	45.1	62.8	61
0.77	34.5	35.5	28.2	32.2	46.6	53.7	16.7	30.1	6.6	26.8	38.8	35.5	38.7	41.3	30.2	30.4	40	40.1	49.3	51.3	27.2	24	44.5	45.4	23.1	23.7	34.4	53.7	4.6373	43.9	41.6	43.9	32.8	63.7	65.2	42.7	40.2	22.9	29.9	43.5	45.1	56.4	55	29.9	42.4	51.3	47.5	58.9	62.7
0.78	34.6	36	27.8	33	47.1	54.5	16.8	29.7	7.3	26.9	39.1	35.6	39.4	40.8	30.7	29.2	39.7	39.3	49.3	51.2	28	24.3	45	45.2	24	24.6	34.5808	54.5	4.68617	47	41.6	42.4	34.7	64.7	70	40.5	42.1	21.8	31.7	39.6	46.6	53.4	53.2	28.6	42.6	47.6	46.4	61.3	63.1
0.79	34.5	36	28	32.5	46.7	54	17.2	30.1	7.3	26.2	39	36.4	38.8	40.5	30.7	29.7	39	39.8	49.5	51.5	27.3	23.6	44.1	44.6	23.5	24.9	34.4385	54	4.64768	45	43.9	40.7	35	66.6	64.2	38.8	42	22.4	30.9	40.4	43.6	56.4	52.7	29.9	42.6	49.7	46.6	62.1	59.6
0.8	33.8	35.4	28.7	32.2	46.9	53.6	17.2	30.6	7.4	26.5	38.5	36.8	38.7	41.6	31.1	29.5	39.4	39.7	49.7	52.4	27.3	24.3	44.6	45.3	23.1	25.4	34.6038	53.6	4.69243	44.2	44.3	43.6	34.8	67.1	67.7	41.9	41	22.9	30.7	42.1	45.5	52.2	54.6	29.8	42.9	49.4	47.6	62.4	63.2
0.81	33.9	35.9	27.9	32.8	47.7	53.1	17.1	31.1	7.4	26	38.8	36.5	38.9	41.2	31.3	29	39.4	38.8	50.1	52.2	28	24	44	45.4	23.4	25.1	34.5769	53.1	4.68513	42.7	42.1	42.6	32.7	66.6	63.7	42.5	42.3	22.9	31.6	41	47.1	53.9	52.4	29.8	42.4	51.1	45.3	58.7	60.7
0.82	34.5	35.5	28.1	33.4	47	54.3	17.2	31.1	7.4	26.4	38.8	36.4	39	41.3	31.3	29.2	39.5	39	50.4	53	27.8	23.5	43.8	44.1	23.5	25.1	34.6385	54.3	4.70182	43.5	42.8	42.6	34.6	64.6	65.9	38.8	43.1	23.3	33	42.1	44.2	54.3	54	29.8	41	49	43.1	60.2	58.8
0.83	34.2	34.8	28.8	34.2	47.9	54.3	18	30.8	7.3	25.9	39.4	37.2	37.9	40.7	31.1	29	39.4	39	49.9	53	27.3	24.3	43.8	46	23.8	25.9	34.7654	54.3	4.73634	45	43.6	41.5	33	62.4	67.2	42.2	43.3	23.9	31.4	40.5	46.8	53.9	54.1	29.1	42.1	49.6	42.6	58.4	61
0.84	34.2	36	29.2	34.2	47.4	54	18	31.3	7.3	25.8	39.2	36.8	38.4	41	30.6	29.2	39	38.2	49.9	53.6	28	23.4	43.1		23.7	25.9	34.296	54	4.60931	44.5	40.5	43.5	33.8	64.7	65.9	41.9	43.8	23	30.6	45.3	47	53.9	53.8	30.5	39.9	48.3	45.9	62.3	65.7
0.85	34.5	35.9	28.8	34.2	47.9	53.6	18	32.6	7.3	24.9	39	36.6	38.5	41.5	30.7	29.2	39.1	38.5	49.7	52.3	27.8	23.5	43.3		23.7	25.4	34.26	53.6	4.59964	40.9	40.9	41.2	33	62.9	64.9	41.8	44.5	23.8	32.1	42.2	47.5	53.9	50.2	29.4	41	46.3	45.3	63.5	64.3
0.86	33.4	36.1	28.5	34.2	47.1	54	17.5	32.4	8.1	26.1	39	36.9	38.3	40.9	30.4	28.8	38.8	37.7	50.7	53	28.6	23.6	41		23.7	26	34.192	54	4.58139	40.7	40.9	43.6	32.4	65.7	65.7	41.7	44.3	23.4	32.4	40.1	48.5	53.9	50.8	27.8	42.9	48.3	45	61.3	62.3
0.87	34.2	36.3	29.2	34.5	47.8	54.2	18.3	32.5	8.3	25.3	39.3	36.1	37.8	41.7	30.8	28.8	38.1	37.9	50.5	52.4	28.7	23.5	42.5		23.7	25.1	34.3	54.2	4.61038	46.3	40.5	40.6	32.3	61.9	66.9	38.1	42.3	24	31.7	40.8	47	52.6	51.5	29.8	39.1	48.5	46	62.9	64.7
0.88	33.9	36	29.2	34.9	48.5	55	18.4	32.2	7.8	25.8	39	37	38.4	41.2	31.2	29	38.4	38.1	50.4	53.2	28.2	23.5	42.6		23.4	26.2	34.46	55	4.65349	42.1	42.1	42.2	34.7	64.7	67.9	42.5	45	24.5	30.9	42.1	45.5	54.3	51.6	26.6	42.6	47.3	44	60.9	59.8
0.89	33.7	36.9	29.7	33.9	46.8	53.8	18.8	32.5	8.6	25.3	39.7	36.3	36.9	40.9	31.1	28.5	38.1	37.4	50.1	52.7	28.8	23.6	43		24	25.7	34.272	53.8	4.60286	43.9	41	43	34.7	66.7	64.5	41.2	44.1	25.5	31	41.8	47	53	53.9	31.2	41.5	48.5	44.9	62.2	59.8
0.9	34.2	37.1	29.7	34.8	47.6	53.3	19.2	32.8	7.8	25.7	38.4	37.3	38.2	41.2	30.6	28.8	38.1	37.3	50.4	52.9	28.8	23.1	42.5		23.5	26	34.372	53.3	4.62976	43	40.7	45.4	34.7	63	67.1	39.4	45	25.7	32.3	43.1	49	51.1	53.2	29.8	40.9	45.8	42.6	56.6	60.5
0.91	33.4	37.1	29.2	35.3	47.8	52.9	18.7	33	7.9	26.2	38.6	37.3	37.5	41	30.9	29	38.1	37.5	50.4	53.1	28.3	23.5	42.5		24.9	26	34.404	53.1	4.63838	41.6	41.9	43.9	33.7	63	66.6	42.5	45.3	25.6	32.7	42	48.6	54.1	52.8	29	42.9	47.9	43.5	58.8	64
0.92	34.6	37.2	29.4	34.9	47.7	54.7	19.1	32.6	8.2	25.9	38	38.3	37.9	40.2	31.6	28.9	38.1	38.5	51.1	52.7	29	23.8	41.8		24	26	34.568	54.7	4.68271	42.5	42.1	40.4	34.2	65.3	68	40.8	45.8	25.3	28.6	43	46.6	53	51.9	28.3	43.4	47.5	43.6	59.4	59.8
0.93	33.8	37.3	29.7	35.3	47.1	53.9	20.1	33	8.2	26.2	38.7	38.4	38.1	40.5	30.7	28.8	37.9	37.6	50.7	53.4	28.8	23.1	42		24	26	34.532	53.9	4.67296	40.2	44.8	42.8	35.1	64.2	66.1	42.1	45.9	25.2	31.7	41.7	46.9	52.4	53.5	30.1	43.2	46	42.1	62.2	63.8
0.94	34.3	37.5	29.7	34.7	47.8	52.4	19.8	33	8.2	26.5	39	37.3	38.4	40.8	30.2	28.2	38.1	36.6	51	53.7	29	23.4	41.5		23.4	26	34.42	53.7	4.6427	40.8	42.1	41.8	32.8	62.7	67	43.2	44.7	27	30.9	44.6	47.6	51.8	50.6	29.2	41.8	46.9	41.5	63.4	62
0.95	33.9	36.6	29.4	34.7	46.6	55.3	19.9	32.8	8	26	38.4	37.9	37.9	40.7	30.2	28.2	37.9	36.6	50.4	52.9	28.8	23.4	42.2		23.7	25.7	34.324	55.3	4.61684	43.5	41.6	41.7	34.8	60.6	62.8	39.4	45.8	26.5	30.2	42.1	45.9	51.7	51.3	28.4	39.6	46.6	38.6	62.9	61.3
0.96	33.9	37.3	29.2	34.9	48.2	54.1	19.7	32.1	8.3	25.4	39	37.4	37.9	40.5	30.4	27.6	36.3	36.8	49.4	52.3	28.8	23.4	41.3		23.7	25.9	34.152	54.1	4.57068	45.7	43.1	42.2	36.3	61.2	66.2	37.9	47.1	26.1	31.9	43.5	46	53.9	50.4	29	41.6	46.6	40.7	60.4	62.4
0.97	33.3	37.7	29.7	35.4	47.6	54	20.6	31.9	8.3	25.1	38.2	37.3	38	40.2	30.5	27.8	36.9	37	50.4	52.9	28.5	23.4	41.8		23.5	25.1	34.204	54	4.58461	43.7	39.9	41.8	35	63.7	63.6	42.1	42.8	26.6	32.7	46.3	46	51.5	53.3	29	42.7	45.4	44.3	61.5	61.9
0.98	33	37.3	29.7	35.5	47	52.9	19.4	33.2	8.4	25.9	38.8	37	37.7	40.3	29.9	27.8	36.9	36.4	49.8	53.2	28.8	23.4	41.5		23.5	25.1	34.096	53.2	4.5557	42.8	39.8	42.9	36.3	63.5	64.3	43.2	45.8	26.5	33.7	44.8	45	49.1	53.5	29.4	41.3	45.3	43.2	58.6	59.7
0.99	32.8	37.9	29.5	35.6	47.3	54.5	21	33	9.1	26.2	38.9	37.5	37.3	40.6	29.3	27.5	37.3	36.1	50.5	52.9	29.3	23.1	41.8		24	25.2	34.328	54.5	4.61791	40.6	42.5	42.4	35.4	66.1	64.6	44.3	48.4	25.2	33	44.8	46.3	51.2	48.8	29.9	42.6	44.9	43.2	64.1	62.1
1	32.3	37.7	29.9	35.9	47.4	52.6	20.5	33.4	9.1	25.7	39.4	37.9	37.4	40.9	29.4	28.1	36.7	36.5	50.7	53.7	29	23.7	42.2		23.5	25.6	34.368	53.7	4.62868	40.4	42.3	39.5	35.7	61.1	63	43.1	43.2	26.7	31.4	44.8	44.4	53.4	49	29.4	42.8	41.9	41.3	61.8	58.4
1.01	33.8	36.9	30.2	35.7	47.8	52.3	20.6	33.4	8.5	26.2	39	37.5	37.5	40.3	29.4	27.9	36	35.3	51.5	53	28.5	23.4	41.7		23.5	25.7	34.224	53	4.58997	43.5	40.4	43.1	33.7	63.8	67.1	42	46.5	25.3	28.7	43.5	45.6	51.8	52.5	29.1	42.6	44.4	41.1	57.7	62.9
1.02	33.4	37.3	29.2	35.3	47.7	52.8	21.2	33	9.1	26.8	39.2	38.2	36.4	39.5	29.9	27.6	35.5	35.3	51.8	54	29.1	23.4	41.8		23.8	26	34.292	54	4.60823	44.9	41.5	43.1	36.3	60.8	64.8	41	42.5	27.1	32.7	43.6	45.9	50.5	50.9	28.6	40	44.2	38.8	56.6	59.2
1.03	32.5	37.3	29.7	35.3	47.4	53.1	19.9	33.3	9.1	25.9	38.1	37.9	37.7	40.4	30.3	28.3	36.3	35.7	51.5	52.9	28.8	23.1	41.4		23.8	25.7	34.216	53.1	4.58783	43.5	42	43.2	36.7	64.3	62.7	44.2	41.8	25.8	32	42.9	46.8	51.1	51.7	27.5	42.6	44	42.4	61.5	61.1
1.04	32.5	37.3	29	35.8	48.2	52.7	20.9	33.4	9.9	26.4	38.7	38.1	36.3	40.8	30.2	27.9	36	34.4	50.7	52.7	29	22.8	42		22.8	25.1	34.144	52.7	4.56854	44.7	42.9	44	38.7	64.3	66.6	45	47.5	28.4	32	41	47.9	51.9	48.2	29.9	44	39.6	42.6	59.8	61.3
1.05	33.4	37.5	29.9	35.6	47.3	52.3	21	32.4	9	25.4	38.7	38.1	37.1	40.1	30.1	26.9	35.3	35.7	50.5	52.9	28.8	23.1	42.2		23.7	25.1	34.084	52.9	4.5525	44.8	40	44.3	39	61.1	59.6	42.9	48	27.1	31.2	44.8	44.3	52.2	50.2	29	41	40.4	40.9	58.1	60.7
1.06	32.8	37.1	29.4	35.6	47.8	53.4	21.3	33.5	9.8	26.2	39	38.1	37.7	39.7	29.8	27.5	34.7	35.6	51.7	53.6	28.8	23.4	41.5		24.3	25.4	34.308	53.6	4.61253	41.2	39.4	42.3	39.6	64.2	64	44.8	43.1	26.6	29.8	45.8	45.8	47.7	47.8	27.8	41.4	42	39.9	59.8	63.3
1.07	33	36.8	29.1	36.1	47.4	52.4	21.6	34.2	9.1	26.7	38.7	38.1	36.9	40.1	30.4	26.9	34.8	35.3	51.7	52.7	29	23.1	42.7		24.1	25.1	34.24	52.7	4.59427	44.4	40.2	40.9	36.7	62.2	62.9	42.5	44.2	27	31.4	44.2	46	49.3	49.9	28.6	41.5	40.7	42.2	60.8	61.9
1.08	33.4	38.2	29.1	36.7	46.8	53.1	21.2	34.8	9.9	26.4	38.7	39	37.3	39.9	30.6	28	34.7	35.2	51.5	52.8	28.9	22.9	41.5		23.7	25.1	34.376	53.1	4.63084	43.5	41.3	42.6	37.5	64.1	65.3	43.5	46	27.5	31.7	47	49.1	52.1	51.2	28.5	42.1	43.1	39.6	61.4	60.8
1.09	32.8	37.2	30.8	35.9	47.4	51.6	20.1	34.2	9.1	25.9	38.4	38.3	37.1	39.9	29.9	27.5	35.1	35.6	51.5	52.7	28.8	22.8	41.8		23.4	25.4	34.128	52.7	4.56426	42	40	44.5	39.1	63.8	65.6	45.3	45.8	27.8	32.4	43.5	48.1	51.9	48.1	29.8	41	40.9	40.6	59.4	61.7
1.1	33.3	35.8	30.3	35.7	47.7	53.1	20.2	34.7	9	26.2	38.8	38.7	37.1	39	30.4	27.3	34.3	34.7	52.1	53.6	29	22.8	41.8		23.1	25.8	34.18	53.6	4.57818	45.5	39.8	43.5	39.6	58.8	63.6	44.8	47	26.6	32	44.8	47.9	50.2	49.3	29.8	37.3	40.5	40.2	62.7	63.6
1.11	33.1	36.5	29.8	35.6	48	52.2	21.2	35	9.8	25.9	39	38.5	36.9	39.7	30.9	26.7	33.8	34.7	51.2	53.7	27.4	22.8	41.7		22.8	25.2	34.084	53.7	4.5525	43.2	40	42	38.7	60.7	65.4	42.6	47	28.3	31.2	43.5	48.3	50.2	50.1	31	37.9	38.7	39.7	58.7	62.2
1.12	32.2	36.9	30	35.2	46.9	50.8	20.9	34.7	10.5	26.5	39.4	38	36.9	39	30.7	26.7	34.1	33.4	51.2	53	27.3	23.1	42.4		23.4	24.8	33.92	53	4.50879	42.1	42.6	42.8	40.1	61.3	63.8	45.8	42.3	28.3	30.5	44.8	46.7	48.7	51.1	30.5	42.4	38.8	37.8	61.4	60.6
1.13	32.9	37	29.4	34.5	47.4	52.3	21	35.2	10.5	26.8	39	39.1	37	39.2	30.7	27.3	32.8	34.2	52.6	52.7	28.2	23.3	41.7		23.7	24.8	34.132	52.7	4.56533	41	41.9	43.5	40.4	63.8	63.1	44.5	45.8	28.6	30.9	44.8	46.3	53.3	52.8	30.2	42.6	39.3	38.1	60.1	57.5
1.14	32.9	36.6	28.9	35.9	46.9	51.5	20.6	35.1	11.2	26.5	38.4	39	37.2	39.3	30.4	26.4	33	34.2	51	52.6	28.6	22.8	41.9		23.4	25.2	33.98	52.6	4.52476	45.1	41.9	42.6	37.1	61.1	61.6	41.8	45.9	27.8	29.9	41.4	48.8	48.5	48.5	29.1	39.6	39.1	40.5	60	56.9
1.15	33	36.4	30.9	35.3	47.6	51.8	20.2	35.2	10.5	26.4	38.5	39.2	36.9	39.3	29.4	26.4	33.4	33.7	50.9	52.3	28	22.5	41.5		23.4	24.9	33.904	52.3	4.50454	41	41.6	40.4	41.6	58.2	61.7	43.2	44.2	27.8	31	44	49.2	49.6	51.1	30.1	38.4	37.8	41.8	59.2	61.1
1.16	33	36.2	29.9	35.8	47.4	51.7	20.9	34.6	11	27.2	39.3	38.8	35.9	39	30.4	26.5	33.1	34.7	51.6	53.5	28	22.5	41		22.8	25.1	33.996	53.5	4.52902	40.7	41.7	41.5	39.6	61.9	65.7	43.6	44	27.4	29.1	45.1	46.3	51.3	47.5	29.4	38.7	38.7	39.8	57.3	57
1.17	32.6	36	30.2	35	47.4	52.5	21.8	34.9	11.7	27	38.5	38.8	36.1	39	29.8	26.3	33	33.9	51.2	52.8	28.2	22.8	41.1		23.4	25.1	33.964	52.8	4.5205	45.3	40.6	40.4	39.1	60.3	64.2	44.3	47.1	26.9	31.4	45.5	47.1	50.2	50.1	29.8	39.6	39.6	39.1	61.5	59.3
1.18	32.2	35.3	29.6	34.2	47.1	51.8	21.8	34.7	11.7	26.4	39	39.4	36.5	38.6	29.9	25.4	31.9	33.5	50.8	51.8	29.4	22.8	40.8		22.8	25.1	33.7	51.8	4.4505	45	41.3	42.3	40.9	62.4	64.9	42.5	41.6	28.4	30.1	44.9	47.5	50.4	47.5	30.9	38.1	37.5	39.7	59.5	60.3
1.19	33	35.2	29.7	34.9	47.1	51.4	21.8	35.3	11.9	26.9	38.5	38	36.4	38.6	29.7	26.3	31.7	32.9	51	53.1	29.4	22.2	41.3		22.4	25.4	33.764	53.1	4.46742	42.9	42.1	44.2	39.3	62.2	63.3	40.4	44.3	29.1	30.2	43.5	45.8	49.4	50.8	29.1	39.9	38.5	41	57.1	59.3
1.2	33	35.3	29.7	34.5	47.3	49.3	21.8	35.3	12.3	26.4	39	39	36.1	38.8	29.7	26	31.5	33	50.8	52.4	29	21.8	41.3		23.1	25.3	33.668	52.4	4.44205	42.1	39.9	44	39.6	60.3	62.2	42	45.9	28.4	31.8	46.4	49	49.7	48.3	30.2	39.6	37.9	39.1	60	58
1.21	32.4	35.5	29.7	34.7	47.6	50.8	22.2	34.8	12	25.9	38.5	38.7	36.3	39	29.2	25.7	31.9	33.7	51	52.9	29	22.3	40.8		22.6	25.1	33.692	52.9	4.44838	44	41.8	42.1	40.9	60.5	60.5	42.3	46	28.3	32.1	45.4	49.7	49.9	47	32	41.8	37	40.4	57.7	58.5
1.22	33	35.6	30.2	34.3	46.3	51.7	22.8	35.3	12.5	26	38.5	39	36.4	38.6	29.7	25.4	32	33.7	51.3	51.9	29.8	21.9	40.6		22.8	24.8	33.764	51.9	4.46742	42.8	39.5	44.2	40.3	59.7	63.5	39.2	43.4	28.6	31.7	41.4	49.4	48.3	50.1	31.3	38.2	36.3	37.6	59.6	60
1.23	32.2	36.1	29.7	34.3	47.3	52.3	23.4	35.1	12.9	26.2	38.7	39.1	36.3	38.4	30.7	25.1	31.9	33	48.8	51.9	28.6	22.2	40.9		22.8	24.7	33.704	52.3	4.45155	42.6	39	39.9	39.2	59.9	61.8	39.6	46.5	28.6	31.4	45.1	49	46.8	50.2	31.9	39.6	34.5	37.3	58.3	59.5
1.24	32.4	35.2	29	34.2	47	51.2	23.1	35.1	13.5	26.4	38.5	39.2	36.2	38.5	29.7	25.1	30.9	32.4	50.3	52.3	28	22.8	40.8		22.8	24.9	33.58	52.3	4.41886	46	37.9	42.1	39.5	60.5	63.7	40.4	44.6	29	31	47.9	47.8	48.5	48.5	31.3	40.1	37.3	41.5	58.2	59.5
1.25	32.4	35.6	29.4	34.5	47.6	51.5	23.1	35.3	14.6	26.4	38.1	38.4	35.9	39.2	29.7	25.7	30.7	32.7	49.2	51.3	28.5	22.2	40.2		22.3	24.6	33.564	51.5	4.41465	45	40.8	42.1	41.1	61.6	59.8	37.5	45.3	29.9	30.6	44.3	48.9	47	51.5	32.7	40.2	36.7	37.3	60.9	58.3
1.26	32.6	35.3	29.7	34.7	47.5	51.3	23.1	34.9	14.5	26.5	38.6	38.1	36	38.8	30.6	25.1	31.1	33	50.8	52.8	28.3	21.8	40.5		22.8	24.3	33.708	52.8	4.45261	45	40.7	40	39.1	58	60.1	40.5	45.4	29.2	30.5	45.5	49	46	46.3	30.9	40.7	37.5	37.5	58.2	54.3
1.27	32.9	34.7	28.5	35.4	46.9	50.5	23.9	35.3	15	26.2	38	38.4	36.1	37.7	30.9	25.1	30.9	33.3	50.9	53.1	28.5	21.7	40.1		22.9	24.9	33.672	53.1	4.4431	44	39.4	40.8	41	61.3	59.1	40.4	43.7	27.9	29.3	44.1	46	50.1	47.3	31.6	39.5	34.7	38.1	57.9	59.6
1.28	32.5	35.1	29.2	35.3	47.4	51.2	23.4	35.3	15.4	26	38.5	38.8	36	38	30.6	26.2	30.7	33.3	49.9	52.3	28.7	21.9	40.5		22.8	25.8	33.792	52.3	4.47483	42.9	41	43.4	38.5	61.2	60.8	37.7	44.1	25.8	29.4	42.7	47.8	47.3	47.5	32.4	39.7	35.2	36.3	57.5	56
1.29	33	35.3	30.4	35.7	47	51.2	22.8	34.9	15.8	25.9	38.4	38.5	35.3	38.4	30.9	25.3	30.4	33	49.8	51.2	29.2	21.2	40.6		21.8	24.7	33.628	51.2	4.4315	42.1	39.3	40.6	41.5	58.5	60.4	39.3	46.5	27.1	31.3	45.7	48	45.1	47	32.6	40.5	33.3	38.1	56	57.9
1.3	32.7	35.7	28.7	35.6	46.9	50.9	22.6	32.7	15.9	25.9	37.6	39	35.3	37.9	30	26	30	33.4	49.4	51.9	28.6	21.8	40.1		22	24.9	33.42	51.9	4.37685	40.5	42.1	42.6	42.1	58.9	61.5	40.9	47.4	29.1	30.6	44.2	48.9	48.7	48.9	31.5	37	34.7	39.4	57.2	56
1.31	33.2	35	29.8	35.8	47	51.5	23.2	34.2	15.9	26.2	37	39.5	34.7	39.1	29.9	25.1	29.9	33.3	50.1	51.8	28.5	22.5	40.8		20.8	24.6	33.576	51.8	4.41781	46.4	43.5	44.9	39.1	59.4	59.8	39.1	45.8	29.4	28.6	46.4	48.9	47.4	46.5	30.9	36.9	34.7	37.9	57.8	56.2
1.32	32.5	35.3	29.7	36.3	47.3	51	23.4	33	16.8	26.5	37	38.2	35	37.7	30.5	24.8	29.5	33.6	49.8	49.7	28.8	22.3	40.8		21.8	24.6	33.436	51	4.38104	47.3	41.8	41.4	37.9	61.5	61.8	39.6	42.9	29.8	30.2	43.5	48.2	46.3	44.8	31	40.4	33.7	39	55.4	55
1.33	32.8	35	29.5	34.7	46.1	50.6	23	33.1	17.2	25.8	38.8	39.4	34.9	37.8	30.7	25.1	29	33.2	49.7	51.7	29.3	22.3	39.4		21.8	24.3	33.408	51.7	4.37371	41.4	43.5	43.2	43.2	56	60.9	40.4	43.5	28.4	30.6	44	49	43.7	48.9	30.2	37.3	35.6	36.3	57.6	58.3
1.34	32.4	35.4	29.5	35.2	47.7	50.9	23.4	33.1	17.2	26.5	37.8	38.8	34.8	38.2	30.1	24.6	29	33.3	49.1	51.3	28.3	21.6	40.6		21.7	24.6	33.404	51.3	4.37266	43.5	43.1	43.3	41.8	60.6	60.9	38.7	39.7	29.8	30.2	41.8	47	48	47.5	31.9	37.1	33	38.4	59.2	56.6
1.35	33.8	34.7	29.6	35.8	47.2	50.2	23.4	32.2	17.2	26.3	37.4	39.5	35.1	38.5	29.9	25	29	33.6	49.6	51.5	27.5	21.2	40.1		22.3	24	33.384	51.5	4.36742	44.6	40.8	44.5	41.5	58.8	59.4	39.3	43.2	29.4	29.4	44.3	51.1	48.5	46	31.1	36.6	34.4	40.7	57.5	56.4
1.36	33.4	35.3	30.7	36.1	46.8	48.9	23.4	32.2	17.2	25.1	37.3	39.4	35.1	38.4	29.9	24.7	28.5	33.5	49.4	50.9	27.5	21.8	40.1		22.8	24.2	33.304	50.9	4.34652	47	40.2	43.4	43.5	59.3	59.4	39.3	44.2	28.3	29.9	40.7	48.9	45.7	46	32.1	37.9	31.4	37.2	57.2	54.7
1.37	33.4	36	30.7	35.5	47	50.4	23.4	31.7	17.6	25.9	37.7	38.6	35.4	37.9	28.8	24.6	28.5	33.2	50.1	51.3	27.6	22.3	39.7		22.8	23.1	33.328	51.3	4.35278	46.4	41.6	41.9	39.8	57.9	56.8	37.9	44.2	28.4	29.5	45.1	49.4	41.9	44	31.3	36.9	33.7	38.2	58.8	55
1.38	32.5	36	30.7	36	46.3	50.8	23.1	31.6	17.5	26.4	37.1	38.4	35.1	38.1	30.3	23.6	28.3	33	48.8	51.3	28.5	21.9	40.5		21.3	23.7	33.232	51.3	4.32774	46.1	39.2	42.9	37.2	59.8	61.4	35.7	41.9	29.1	29.8	45.3	47.6	47.4	48	32.8	37.9	35.5	38.7	59.2	56.4
1.39	32.6	35.7	29.2	35.7	46.6	51	24	31.3	17.2	26.5	37.5	38.8	35.4	37.2	29.7	23.2	28.3	34.1	49.4	52	28	21.6	40.1		21.9	23.4	33.216	52	4.32358	47	41.3	45.1	41.5	58.6	61.6	36.3	42.7	27.8	27.5	44.3	48.8	47.8	50	32	37.3	34.2	38.4	58.4	52.6
1.4	33.4	35.5	29.7	36.7	46.2	48.7	22.8	31.7	18.8	26.2	38.3	38.7	34.2	37.3	30.7	24.6	28.5	33.9	49.4	50.5	28.5	20.9	39.9		21.8	24	33.236	50.5	4.32879	45.8	42.1	42.1	42.1	56.7	59.9	36	42.4	28.7	31.1	46.8	48.6	47.4	45.5	31.6	37.9	33.6	38.6	57.4	55.2
1.41	33.4	36.1	31.5	36.1	47	49.9	23.7	31.1	18	26.2	37.1	38.5	35.3	37.3	30	23.7	28.5	33.3	49.5	51.6	28.1	21.3	40		21.6	24.3	33.324	51.6	4.35174	48	39.6	42.8	44.2	56.7	60.9	36.9	38.2	29.1	29.5	42.6	46.3	44.3	48.6	29.4	38	33.4	39.1	59.3	56.2
1.42	33.1	36.4	30.7	36	46.3	50.1	24.3	30.7	18	26.2	37.4	38.4	35.5	37.6	30.6	23.7	28	33.3	49.2	51.5	27.3	21.2	39.4		22.3	23.7	33.236	51.5	4.32879	47.4	39.3	41	43.5	58.6	60	36.3	40.2	29	28.9	46.3	45.8	46.6	47.1	33.3	37	34.2	38.8	58.7	55.3
1.43	33.7	37.3	30.7	35.7	47.4	49.8	24	31.8	17.9	26.2	37	38.5	34.5	36.8	29.7	23.4	27.2	33.4	50.1	51.6	27	21.6	39.4		21.9	23.4	33.2	51.6	4.31941	48.8	40.5	41.8	39.9	57.2	58.4	36	44	29.8	30.2	45.9	47.5	43.4	44.9	30.9	36.9	33.7	36.7	60	53.9
1.44	33.9	36.9	30.2	36.3	46.1	49.8	24.3	31.1	17.9	25.6	37.7	38.3	35.2	36.8	29.9	23.7	28.8	32.6	49.8	50.1	27.3	21.2	38.6		21.8	24	33.116	50.1	4.29758	49.5	41.4	44	40.8	57.1	59.1	36.7	43.6	29.8	30.2	43.5	50.1	46.8	47.4	29.8	37	32.6	37.5	56.8	53.5
1.45	33	37	30.3	36.5	44.7	50.4	24.9	30.7	17.9	26.2	37.1	37.6	34.7	37.1	30.4	24.3	28.3	33.4	48.7	50.9	27.2	21.6	39.4		21.9	23.6	33.112	50.9	4.29655	48.5	41.6	44	43.6	58.6	57.9	35.9	42.9	27.9	30.9	47.3	49.9	46.3	44.7	31.7	36	32	33.8	51.5	54.6
1.46	34.2	37.1	30.6	36.7	45.7	50	24.9	30.8	18.4	26.5	36.9	37.9	34.9	37.4	29.8	23.7	27.2	32.8	49.7	51.3	27.2	21.2	39		22.3	23.1	33.172	51.3	4.31213	44.9	41.5	40.7	42.8	60.3	59.4	36	42.1	29.5	30.2	45	47.3	43.5	47.1	33.7	37.3	32.7	37.9	53	51.2
1.47	33.2	36.6	31	36.4	46	49.4	25.2	30.9	18	26.8	37.9	38.1	34.7	37	30.7	24	28	33.7	49.8	50.8	26.9	21.2	39.2		21.9	23.3	33.228	50.8	4.3267	49.3	41.8	41	42.1	55.6	56.6	36.3	42.4	29.9	29.9	44.3	47.8	44	46.3	32.4	36.6	34.7	39	54.2	53.9
1.48	34.2	37.7	31.1	36.3	46.4	49.5	25.7	31.1	18.3	26.6	38.1	38.3	34.7	36.9	30.4	23.4	28.5	33.5	49.9	51	26.5	21.9	38.8		22.4	23.3	33.38	51	4.36638	46.6	44	41.3	42.6	56.1	58	36.3	42.1	28.4	29.9	46	48.8	46.1	46.2	31.4	37.2	32.7	36.4	54.8	54.3
1.49	33.4	37	31.1	37.2	47	49.1	25.2	31.3	17.9	26.8	38.3	39	35.1	36.8	30.8	23.7	28	32.1	50.1	50.5	27.3	21.5	39		21.2	22.9	33.292	50.5	4.34339	48.1	42.2	42.6	43	59.2	61.1	35.7	41	29	30.6	44.8	48.1	46.8	45.3	32.8	34.7	32.3	36.1	54.4	55.2
1.5	33.6	37.7	31.3	37.3	47.1	50	25.4	31.7	18	26.4	37.3	38.2	35.3	36.3	30.7	23.9	28.5	32.8	49.5	50.4	27.3	21.6	39		21.8	22.8	33.356	50.4	4.3601	47.6	41	42.9	42.5	57.3	58.2	35.7	41.8	28.7	29.8	45.9	45.9	41.9	45.7	31	35	33.4	37.6	53.6	53.9
1.51	33.9	38.3	31.2	37.2	46.1	48.8	25.1	30.9	18.8	27	37.3	38.1	34.1	36	29.3	23.7	28.3	33.3	50.1	51.1	26.5	21.2	38.9		21.8	22.8	33.192	51.1	4.31733	49	43.4	40.7	44	58.4	59.8	34.7	41.7	29.2	28.7	44.5	49.7	45.9	44.5	31.4	34.7	33.9	34.6	53.3	52.1
1.52	34.9	38.4	30.8	37.1	46.5	49.7	25.9	30.8	19.1	26.8	37.3	38.5	34.2	35.9	30.2	23.4	28.3	33	49	50	26.5	20.5	39		21.8	23.3	33.236	50	4.32879	47.5	42.6	42.3	44.5	58.1	56.8	36.3	41.4	29.9	29.4	44.5	49.3	42.7	42.9	32	35	32.9	36.8	54.1	52.3
1.53	35.1	38.7	31	36.9	46.6	48.8	26.2	31.2	19.1	26.4	37.1	37.9	34.8	36.5	30.4	24.6	28.6	32.9	49.4	49.1	27.2	21.8	38.4		21.9	22.6	33.328	49.4	4.35278	46.2	41.1	42.4	46	55.2	56	37.7	42.2	27.9	31.4	47.4	48.9	45.1	42.7	32.4	37	35	36.4	52	53.9
1.54	34.7	38.4	31.2	37	46.1	48.3	25.9	31.5	19.2	25.9	37.1	37.9	33.9	36	29.8	24.3	28.7	32.2	49.2	50.5	26.8	20.9	38.1		21.8	23.1	33.14	50.5	4.30382	49	42.8	42.3	44.1	56.1	58	36.6	42.2	28.8	29.1	46.5	51	45.1	45.2	32.3	34.7	34.4	37.9	54.5	53.4
1.55	34.2	38.2	31.5	37.2	45.9	49.2	26.2	31.1	19	25.8	37.7	37.3	33.7	35.5	29.9	24	28.5	32.6	49.7	49	27	21.2	37.9		21.8	22.8	33.076	49.7	4.28721	47.1	42.8	41	43.9	53.8	55.4	36.4	41.1	29	27.5	47.2	50.1	45.2	45	31.3	36.9	33.6	37.3	49.7	53.4
1.56	33.9	37.1	32	37	46.7	48.7	26.8	30.8	19.4	26.3	37.3	37.5	34.2	35.6	29.2	23.7	28.5	33.3	49.1	50.1	26.8	21.6	38.3		21.2	23.1	33.128	50.1	4.3007	47.8	41.9	42.4	44	58.3	58	37	39.9	28.8	29.1	43.9	46.3	45.9	45	31.4	36.9	30.3	37.3	49.2	53.9
1.57	34.5	38.7	32.2	36	46.6	49.8	27	31.8	20.2	26.2	37.3	37.9	33.7	35.5	29.7	23.7	28.7	32.2	48.8	49.6	26.8	20.9	38.4		21.5	22.9	33.224	49.8	4.32566	49	42.7	40.5	44.5	54.7	56.2	35.2	37.3	29.9	29.8	44	48.5	44.7	44.3	32	34.3	33.7	36.7	53.8	51.3
1.58	34.2	39.5	31.5	36.5	46.4	48.5	26.8	30.9	19.9	26.2	36.7	38	33.6	35.6	28.8	23.1	28.5	32.6	48.2	50.2	26.3	21.3	37.9		21.8	23.1	33.044	50.2	4.27892	45.8	44.8	41	40.9	58.8	55	36.8	41.3	29.6	28.6	45.3	49.2	40.2	46.6	32	32.4	33.1	36.9	54.9	55
1.59	33.9	38.6	31.7	36.4	47.1	48.2	26.9	31.1	20.1	26.4	37.9	38.4	33.8	35.3	29.2	23.7	29	33.1	49.3	49.4	27.2	21.1	36.8		21.8	23.1	33.18	49.4	4.31421	47.5	42.2	40.7	44.6	58.4	52.2	37.9	39.6	29.8	28.2	46.9	50.3	45	46.3	32.4	34.7	34.5	37.9	51.8	52.8
1.6	35.2	38.4	31.7	36.4	47.1	48.9	26.8	31.6	19.7	26	36.4	38.6	33.2	35.4	29	24.6	29.2	32.4	49.4	50	26.4	20.2	37.7		21.3	22.5	33.124	50	4.29966	48.7	38.6	41.3	44.9	56.2	54.8	35.6	37.4	29.1	28.3	45.7	49.7	42.6	47.5	29.8	34.7	34.4	36.9	53	51.8
1.61	34.9	38.4	31.7	35.8	46.9	48.5	27.3	32.1	19.8	25.9	36.9	37.9	33.9	35.5	29.2	23.9	29.2	31.7	49.3	47.6	27.3	20.7	38.4		21.2	22.8	33.072	49.3	4.28617	49	42.6	40	40	55.4	55.3	37.1	37.3	29.1	28.7	45	50.1	46.1	45.6	33.4	35.5	34.8	36.7	53.3	50.2
1.62	35.7	38.2	30.2	36	46.2	49	26.5	32	19.9	26.3	37.1	38.4	33.5	35.5	28.8	24.2	28.6	33	48.8	48.8	26.5	21	38.4		21.2	22.3	33.044	49	4.27892	48.5	42	37.6	43.6	55	58.8	35.4	40.2	28.6	29.9	45.7	46.3	42.6	45.6	32	34.7	35.5	35.1	52.3	51.3
1.63	35.7	38.4	31.1	36	46.6	48	27	32	19.9	26.1	36.7	37.7	33.2	34.7	28.9	24	29.3	32.1	49	46.6	25.9	21.2	37.9		21.2	21.9	32.844	49	4.22728	47	43.2	40	44.6	58.4	55.2	34.8	40.4	28.4	29.4	45.6	44.9	42.6	45.8	33.3	36.8	35.7	36.3	51	51.1
1.64	35.7	38.5	32	35.4	46.5	48.2	27.6	32.1	21	26.7	37.5	37.7	33.7	34.7	29	24.2	29.2	32.1	48.1	49	26.3	21.6	37.7		20.1	22.5	33.084	49	4.28928	46.3	43.5	40.4	44.2	54.4	56.7	35.5	39.1	29.8	28.7	42.8	47.2	42.1	41.8	33.4	35.2	35.7	36.1	50.1	49.5
1.65	35.3	39.1	31.3	36	46.6	48	27.2	31.5	21.1	26.8	37.7	38.3	33.5	34.9	29	23.7	28.6	32.4	49.2	48.8	26.9	20.9	38.3		21.1	22.5	33.148	49.2	4.30589	45.5	42.1	41.3	43.5	54.3	56.3	33.9	37.9	29.1	29.8	42.7	47.7	44.8	42	33.1	36.3	35	37.2	51.1	50.2
1.66	35.1	38.5	31.8	35.3	46.2	47.9	26.7	31.7	19.9	26.5	37.1	38.3	33.5	34.9	29.2	23.7	29.2	33	48.5	48.1	26.8	21.3	38.6		21.6	22.8	33.048	48.5	4.27995	46.4	40.4	42.9	41.9	53.4	55.1	33.5	39.4	27.8	29.4	46.5	47.6	41.6	44.2	31.5	35.4	35	33.7	52.2	50.2
1.67	36	38.4	31.3	35.8	46.7	47.8	27.3	32.2	21.1	26.6	36.9	37.1	33.4	36	29.2	24	28.5	32.2	48.5	48.5	26.9	20.5	38.4		21.1	22.5	33.076	48.5	4.28721	44	41	41.3	42.4	57.5	55.9	35.1	37.4	27	29.8	45.9	46.6	44.2	44	31.1	33.7	35.7	36.3	53.6	47.8
1.68	34.6	38.8	31	34.7	46.2	47.6	27.5	32	20.9	26.8	36.7	38.1	33.4	35.1	29	24.1	29	32.2	48.7	48.1	26.4	20.9	39.2		20.4	21.6	32.92	48.7	4.24686	47.6	42.6	40.5	45.9	57.1	52.6	33.7	36.7	29.4	28.7	46.1	47	43.5	42.5	33.5	33.4	35.4	35	50.1	49.9
1.69	35.6	38.1	31.8	35.4	46.4	48.2	26.3	32.1	20.2	26.2	36.6	37.4	32.9	33.2	28.8	24.3	29.4	32.3	49.5	48.3	26.8	20.3	39		21.1	21.9	32.884	49.5	4.23758	45.9	42.4	43.8	43.6	55.2	54.9	32.7	39.4	28.6	27.1	45.1	47.5	44.5	44.8	32	35.3	33	33.7	50.3	50.4
1.7	36	38.1	31.7	36.4	46.5	48.1	28.1	32	21.2	26.4	36	37.4	33.5	33.9	29.2	24.4	29.5	32.6	47.4	47.5	26.5	20.5	39.2		21.6	21.8	33.02	48.1	4.2727	46.3	41.8	43.4	45	57.4	53.1	34.7	37.9	28.7	29	46.1	45.7	46.1	43.9	31.3	35	34.7	34.7	50.1	49.4
1.71	36	37.7	32	36	46.2	47.9	27.5	32.2	21.2	26.6	36.1	38.1	33.5	34.5	29.8	24.1	29.3	32.5	48.4	46.8	26.5	21.5	39		21.3	22.2	33.076	48.4	4.28721	48	41.6	42.1	44	57.5	53.8	33.7	38.2	28.3	28.1	45.9	49	42.3	44.5	32	32.1	36.9	34.7	50.2	49.7
1.72	35.1	38.6	31.6	35.5	46.3	47.8	27.3	32.4	21.6	27	37.3	38.1	33	34.7	29.8	24.2	29.2	33	48.4	46.6	25.9	21.2	39.2		21.2	22.5	33.1	48.4	4.29343	48.7	41.8	43.3	40.7	54.4	54.3	34.4	37.6	28.7	29.1	43.1	46.2	41.2	45	33.1	33	34.7	34.7	50.3	49
1.73	35.2	38.4	31.3	36.4	45.9	47.9	26.8	31.6	21.2	26.5	36	37.5	32.1	34.2	29.3	24.6	29.8	33	48.3	46.6	26	20.9	39.1		21.3	21.9	32.872	48.3	4.23449	46.6	39.3	40.8	44.5	53.6	54.7	34.4	37.9	29.4	27.9	42.4	44.1	40.9	45	33.3	34.7	36.6	34.7	51.5	49.1
1.74	34.9	37.4	31.1	35.4	46	47.9	27.2	31.7	20.5	26.5	36.8	37.3	33	33.7	29.2	24.6	29.7	32.8	48.2	46.6	26.2	20.6	39.2		21.9	21.9	32.812	48.2	4.21904	44.9	42.9	38.5	44.8	56.8	54.4	34.6	38.5	28.3	28.2	44.3	47	41.5	45	32.8	36	36.3	35	51	50.1
1.75	35.6	37.5	31.7	35.2	46.2	47.4	27.7	32.4	21.2	26.4	36.5	37.1	32.8	33.2	29.2	25.1	29.3	32.6	48.7	46.6	27	20.3	40.1		21.5	21.9	32.928	48.7	4.24893	44.6	39.1	40.4	43.5	55.5	53.1	34.4	38.5	28.6	27.7	46.3	45.1	40.9	43.5	33.3	34.2	34.1	34.1	51	48.1
1.76	36	38.1	31.8	36.7	45.9	46.4	27.5	32.2	21.5	26.4	36.9	37.3	32.2	33.5	29.2	23.8	28.8	32.7	47.7	46.9	26.2	20.5	39.1		21.8	21.8	32.836	47.7	4.22522	47.7	40.7	39.1	40.2	53.4	53.9	34.7	39.1	29.9	29.1	44.8	49	40.4	44.3	31.2	33	33.7	34.4	51.5	49.2
1.77	35.8	37.9	31.3	36.1	46.6	47.1	26.8	32.2	20.9	26.2	36	37.7	33.1	33	28.7	24	29.7	33.1	48.7	46.6	26.3	20.2	39.2		21.6	21.8	32.824	48.7	4.22213	45.6	37.2	41.6	45	55.6	54.5	35.7	36.9	28.3	27.5	43.2	46.1	40.5	44.2	31.9	32.8	33.4	35.4	47.5	46.6
1.78	36	36.9	31.1	36	47	46.5	27.2	31.8	20.2	25.9	35.4	37.4	32.5	33.3	28.6	23.8	29.2	32.1	48.6	45.5	26	19.8	39.4		21.6	21.9	32.548	48.6	4.15143	46.1	41.3	41	43.6	55	54.1	32.3	38.2	29.1	27.4	44.3	47.1	40.9	44.2	31.6	32	35.3	35	50.6	47.2
1.79	36.3	36.9	31.5	35.7	45.4	46.7	27.5	32.6	20.9	26.4	35.8	37.7	32.5	33	29	23.8	29.9	33.1	48.8	46	27	20.2	38.2		21.5	21.8	32.728	48.8	4.19747	46	40	41.3	44.2	52.5	49.8	35.4	36.2	29.3	28.2	43.6	44.2	40.5	42.8	32	31.4	35.4	35.5	50.3	48.7
1.8	36	37.1	31.3	35.2	45.2	44.6	27.2	32.2	21.2	26.5	35.7	37.1	33	32.6	28.8	24.1	29.7	32.4	48.4	46.2	26.4	20.5	39.1		21.6	22.2	32.572	48.4	4.15755	46	40.9	39.1	41	54.8	55.5	34.4	37.9	28.6	27.1	44.8	44.9	40.6	39.9	33	32.8	35.2	33.7	48.9	47.3
1.81	36.1	36.9	31.7	33.9	45.9	46.6	28	33	21.1	26.5	36.9	37.3	32.2	33	28.5	23.7	29.4	31.7	47.8	45.5	26.3	20.3	38.4		20.9	21.8	32.536	47.8	4.14837	45.8	40.9	42.1	40.2	55.8	54.8	34.7	35.6	28.3	28.4	41.8	46.9	39.7	41.6	32.3	31.4	36.7	34.5	48.6	49
1.82	36.2	37.3	32.1	35.7	45.6	46.2	28.1	32.2	21.2	26	36.2	38.1	32.4	33	27.8	24	29.5	31.8	47.9	45.5	26.4	20.5	38.4		20.5	21.7	32.572	47.9	4.15755	46.4	41.2	41.3	42.3	50.5	50.6	35	34.1	30.1	27.6	44.2	44.5	41	42.4	31.9	31.7	34.5	34.4	46.2	49.2
1.83	36.1	38.1	31.5	34.7	45.9	46.6	27.3	32.1	21.3	25.9	35.9	37.6	33	32.6	27.2	23.6	29.7	31.6	48.2	45.5	26.2	19.8	38.3		21.3	21.4	32.456	48.2	4.12799	45.4	41.1	43.5	41.8	54.2	51.5	33.1	37.5	29.8	29	42.8	46.3	40.5	42.3	31.6	33.8	35	31.1	49.1	46.7
1.84	36.4	37.4	32.1	36	45.4	46	27.8	31.7	21.6	26.7	36.3	36.8	32.6	32.8	28	23.4	29.4	31.8	47.8	45.8	27	19.8	38.5		21.2	21.3	32.544	47.8	4.15041	41.9	39	43.6	41.3	52.6	51.9	33	35.4	29.4	27.8	42.6	48.2	39.2	40.5	33.7	33.1	34.2	32.3	48.4	47
1.85	36.4	35.7	31.3	35.8	45.2	45.2	28	32.2	21.2	26	36	37	32.6	33.2	28.3	23.5	30.9	32	48.1	45.7	26.4	19.8	38.7		21.2	21.1	32.46	48.1	4.12901	43.4	40	40.7	41.5	55.8	53.5	33.7	36.3	29.5	27.5	42.2	47.4	41	41	34.1	32.4	36	31.5	45.3	49.7
1.86	35.3	36.5	31.3	35.8	44.5	46.2	28	32	21.4	26.2	35.3	37.9	32.4	32.8	28	23.4	29.9	31.7	47.3	45.4	26.7	20.2	37.4		21.6	21.2	32.336	47.3	4.09752	42.2	38.4	42	41.8	53.5	52.6	35.7	36.3	29	27.8	41.5	45.1	39.6	42.9	34.1	32.7	34	32.1	46.9	45
1.87	36.5	36.9	31.7	34.9	44.3	46.5	28.5	32.2	21.3	26.5	35.4	37.5	32.2	32.9	28.5	23.4	29.7	31.1	47.4	45.9	26	19.8	38.3		20.9	20.9	32.368	47.4	4.10564	45.5	40.6	43.2	44.2	55	53.7	33.4	36	28.4	27.9	43.5	46.6	39.6	42.8	33.6	32	34.8	33.5	48.3	48.4
1.88	36.9	36.2	32.6	34.9	44.9	45.8	28	32.2	21.6	26.1	35.8	36.5	32.2	32.2	28.5	23.3	29.7	31.1	46.8	45.9	26.5	19	38.3		21.3	21	32.292	46.8	4.08638	44.3	36.3	39.6	44.4	50.2	52.2	33.8	37.3	28.5	27.9	39.5	47.6	40.4	42.1	31.3	31.9	35.6	32.8	48.1	46
1.89	37	36	33.3	34.8	45.2	45.9	28.5	32	21.2	25.9	36	37.1	31.5	33	28.5	23.4	29.4	31.3	47.4	44	25.8	19.9	37.9		21.6	21	32.304	47.4	4.08942	44	36.3	39.9	43.7	53.5	50.8	34.1	36.8	27.6	27.9	42	47.5	37.2	44.2	33	32.8	36.6	33.4	44.5	45.2
1.9	36.4	36.7	32.6	35.4	45.1	45.3	28	31.3	21.1	25.1	36.2	37.1	31.1	32.2	28.8	24.6	29.7	31.8	47.3	45	26	20.2	38.3		21.9	20.9	32.324	47.3	4.09448	44.3	39.7	41.3	42.8	52.1	50.4	33.5	36.5	28.2	27.9	40.2	48.5	37.3	43.9	31.6	33.6	34.6	32	48	43.5
1.91	36.8	37.2	32.8	35.1	44.4	45.3	28	32	20.8	25.1	36.2	36.9	31.1	32.1	28.8	24.7	29.7	30.7	48.1	44.3	26.3	19.8	38.3		21.5	20.9	32.276	48.1	4.08233	45	39.8	42.8	43.4	52	52.6	36.3	32.1	29.2	27.9	41	45.7	39.8	41	32.4	33.4	34.2	32.2	48.4	46.1
1.92	37.3	36.4	32.4	34.7	44.2	45.2	27.2	31.3	21.1	24.6	35.7	36.9	31.8	32.8	28.5	24	29.9	30.8	47.5	44.4	25.1	19.5	37.7		21.5	21.1	32.064	47.5	4.02888	45.9	39.8	41.9	42.6	50.8	52.7	29.9	34.5	25.4	24.9	40	42.6	39.1	40.4	29.8	32	36	34	47.5	46.7
1.93	36.6	35.1	33	34.7	44.8	46.4	28.5	31.7	21.2	23.4	35.6	37	31.8	32.6	28	23.5	28	30.7	47.5	45.5	25	19.8	37.1		21.2	20.8	31.98	47.5	4.0078	44.3	40.8	39.6	42.3	48.9	49.7	32.9	36.3	27.9	27.9	42.9	47	37.3	41.5	32	31.6	34.9	32.3	46.4	47.5
1.94	37.5	36	33	34.1	44.8	46.5	28.8	31.4	20.8	24	35.3	35.4	31.3	32.5	28.9	24	29.5	30.7	47.4	44.7	26	19.8	37.5		21.2	21.2	32.092	47.4	4.03592	39.5	39.5	38.7	43.9	53	50.2	34	33.9	27.8	26.3	44.6	44.2	40.2	42.6	31.6	30.9	34.6	31.6	46.4	48.4
1.95	37	36	33.6	34.7	44.5	45	28.8	32	20.9	23.1	36	36	31.1	32.8	28.5	23.7	29.2	31.1	47.4	44.7	25.8	20.2	37.1		21.9	20.5	32.064	47.4	4.02888	43.5	37.8	41.3	42.9	53.9	50	33.2	33	28.8	27	44.9	47	37.8	41.3	30.1	30.9	34.7	30.4	47.3	46.4
1.96	37.4	35.7	33.4	33.5	44.5	45.7	29.5	31.6	21	22.8	34.9	36.5	31.1	32.6	28.2	24.6	28.8	30.7	46.2	44.2	25.4	19.9	37.5		21.2	21.2	31.924	46.2	3.99377	44.5	39.6	42.3	43.2	51.9	51.5	32.5	32.9	28.7	26.9	44	44	36.3	41	31.3	32.5	33.6	32.7	49	43.7
1.97	38	35.9	33	34.3	44.2	46.3	28.8	31.5	20.9	22.8	35.2	36.1	31.1	32.2	27.7	24	28.3	30.2	46.9	45.7	25.2	19.4	37.4		21.2	21.2	31.9	46.9	3.98777	45	39.3	42.3	42.7	51	49.6	31.9	35	28.3	27.4	41.1	45.9	38.1	39.7	30.1	32.7	34.1	32.4	46.8	48.7
1.98	38	35.3	33.7	34.6	43.2	45.4	29.2	30.9	20.9	22.8	35.3	35.1	30.9	32.9	28.3	24	29.3	29.7	47	45.5	25.2	19.8	36.8		21.9	21.5	31.888	47	3.98477	43.1	37.9	40.1	41.3	52.4	49.2	31.4	35.8	27.9	27.1	42.4	48.3	37.5	42.1	30.8	29.7	34.7	31.6	44.3	44
1.99	36.3	36.2	33.7	34.8	44.3	45.3	29	31.9	21.2	22.8	36.4	35	31.1	32.8	28	24	28.2	30.6	47	44.5	25.4	19.9	37		21.2	20.9	31.9	47	3.98777	42	39.1	42.3	44.6	51	50.5	29.9	35.6	28.3	25.2	42.6	47	39.6	37.5	30.7	31.5	35	31.3	45.1	47.6
2	37.9	35.9	33.4	34.5	44.2	44.3	29.2	31.1	21.5	22.8	34.7	35.1	30.4	32.5	28	23.6	28.2	30.7	47.2	44.2	25.4	20.2	37.2		21.3	20.9	31.776	47.2	3.95683	43.2	37.1	40.6	43.2	53.7	52.4	30.7	34.7	27.1	27.4	42.6	45.3	37.9	37.9	30.4	31.3	33	32	46.4	47.6
2.01	37.9	36.1	33	34.4	45	44.9	29.5	30.7	21.2	23.5	35.8	35.9	30.7	32.6	27.8	24.3	28	30.2	46.9	44.9	25.1	19	36.5		21.2	20.6	31.828	46.9	3.96979	42.1	40.2	41	41.4	54.3	50.1	31.3	34.3	27.8	26.6	44.3	48.3	38.1	37.9	32	29.7	34.7	30.5	47	46
2.02	37.3	36	33.4	34.5	43.6	44.9	29.3	31.1	20.1	22.8	35.5	35.3	30.6	31.9	27.3	24.6	28	30.2	46.5	44.8	25.4	19.6	37.1		21.1	21.2	31.684	46.5	3.93395	40.9	40.7	42.6	40.1	51	44.6	32	33	28.7	27.9	43.7	45.9	39.3	39.1	31.6	30.9	34.8	30.9	47.6	47.5
2.03	37.9	35.7	33.9	34.7	43.3	43.4	29.2	31.1	21	24.3	36	36.1	30.7	33	27.5	24.6	28	29.7	46.7	44.9	25.3	19.8	36.5		20.9	21.2	31.816	46.7	3.9668	40.9	37.9	39.6	44.6	49.7	52.2	30.9	32.3	28.7	27.1	42.1	47.3	37.5	39.8	32.3	29.5	33.1	29.1	41.9	48
2.04	38.4	34.9	33.3	34.7	43.4	44.7	28.9	31.1	20.5	23.4	35.7	32.9	30.8	32.2	27.6	24.6	28.3	30.4	46.3	44.9	25.1	20.3	36.8		20.7	21.2	31.644	46.3	3.92402	42.1	41.1	41.9	39.8	49.2	46.3	30.9	32	28.8	26.7	43.6	47.5	36.9	39.1	32	32	34.1	29.9	45	44.3
2.05	37.7	35.5	33.5	33.7	43.4	44.4	28.5	31.1	21.2	23.4	35.8	34.3	31	32.9	26.7	24.3	28	30	45.8	44.2	25.4	20.3	37.6		21.2	20.3	31.608	45.8	3.9151	44.7	37.9	42.7	44.3	49.5	45.9	30.2	32.1	27.9	25.3	42.1	46.1	37.4	39.5	33.3	29.8	33.4	31.3	45.5	46.1
2.06	38.5	34.9	33.7	34.2	43.6	44.9	29.1	30.8	20.9	23.1	35.2	34.8	30.4	33.5	27.3	24	28	29.7	46.2	44.3	25.4	20.3	36.4		21.2	21	31.656	46.2	3.927	45.8	37.2	43.5	42.5	48.2	47.8	29.8	31	28.8	26.7	40.4	46.3	39.3	39.6	31.9	31.2	32	30.3	45.1	47.3
2.07	37.7	35.4	34.1	33.7	43.7	45.1	29.3	30.4	21.3	23.4	36	34.6	30.6	32.8	26.4	23.4	28.2	29.2	46.2	43.6	25.1	20.2	37.2		21.3	20.6	31.58	46.2	3.90817	43.6	39.6	42	43.2	49.4	46.2	31.7	30.2	26.7	26.1	39.9	43.7	37.3	41.8	31.4	31.2	31.6	29.1	44.9	44.9
2.08	38.1	34.6	34.2	33.4	43.5	45.1	29.4	30.2	21.6	23.4	35.6	35.1	29.7	32.1	26.9	22.8	27.9	29.8	46.7	43.4	25.2	19.8	37.2		19.7	21	31.456	46.7	3.87753	43.4	38.7	42.4	43.6	52.2	48.5	32	30.6	29.1	25.3	41.1	46.1	36.7	40.6	28.1	29.8	31.3	29.8	47.1	45.6
2.09	38.4	34.6	34.7	34.2	44.1	44.1	29.2	29.7	21.6	22.4	34.9	35.2	29.7	32.6	26.9	23.2	27.3	29.7	45.9	43.5	25.1	20.2	37.4		20.2	20.5	31.412	45.9	3.86669	45.6	36.3	38.7	42.9	48.1	48.7	31.4	31.3	27.4	27.5	41.5	43.4	40.2	39.8	31.4	31.3	33.7	29.1	44.5	44.9
2.1	38	34.9	34.2	34.3	43.3	44.5	29.2	29.7	21.2	22.8	34.5	35.5	30.2	32.2	27.2	22.4	27.2	29.4	45.8	43.5	25.5	19.8	36.9		20.5	20.9	31.344	45.8	3.84997	44	38.4	42.2	43.5	46.1	46.3	30.6	31.4	28.3	27.2	43.2	45.9	38.1	39.3	28.6	30.6	33	29.9	41	42.3
2.11	38.1	35	34.8	34.7	43.3	45.1	29	29.7	21.2	22.8	35.2	34.7	30.4	32.4	28.2	22.7	27.3	29.3	45.8	43.5	24.3	19.9	37.3		20.9	20.2	31.432	45.8	3.87162	42.4	36.3	45	41	48.5	47.4	29.5	31.6	27.5	26.6	39.1	46.3	38.5	37.1	29.8	30.9	32.8	29.1	46.7	43.5
2.12	37.3	33.1	34.8	34.2	42.6	44.3	29.7	29.5	21.1	23.4	34.3	34.6	29.9	32.1	27.3	23.4	27.8	29.7	44.6	43.9	24	19.8	36.7		20.9	20.9	31.196	44.6	3.8137	41.5	37.8	42.6	40.9	51.6	46.3	29.8	31.7	27.8	26.2	40.5	45.5	38.2	39.9	30.5	29.7	33	29.1	44	44
2.13	38.6	34.2	34.2	34.2	42.6	44	29.3	29.7	21.8	22.8	35	34.8	30	31.9	27	23	27.3	29.5	45.8	43.3	24.6	19.8	36.5		21.2	20.5	31.264	45.8	3.83034	42.7	40.4	42	41.4	48.3	47.9	29	31.3	28.3	25.2	39.4	42.5	37.8	39	29	31.6	33.1	29.8	46	43
2.14	37.5	34.7	33.9	34.7	42.3	44.4	29	29.7	21.3	23.4	34.9	34.7	30	32.2	27.2	23.4	26.5	29.3	44.9	44	25.1	19.2	35.9		20.6	20.8	31.184	44.9	3.81077	39.9	39.6	40.4	42	48.7	47	28.6	27.8	27.4	25.3	42.7	45.9	37.9	38.2	29.8	30.5	32	29.7	45.8	45.8
2.15	38	35.3	33.6	34.2	42.8	42.8	29	29.8	21.2	23.4	35.2	34.5	29.8	31.9	28	22.8	28	28.9	44	43.2	24.8	19.8	37.2		19.9	20.2	31.132	44	3.79807	44.4	39.3	40.2	40.4	51.1	48.5	29.9	27.8	26.9	25.8	42.6	42.6	37.3	39.4	27	29.8	32	30.1	45.3	44.2
2.16	37.3	34.7	33.4	34.8	44.1	44.4	29.3	29	21.5	23.4	34.8	34.2	29.7	32.2	27.2	23.1	27.8	28.4	45	43.5	25.1	19.9	36.5		20.5	19.8	31.184	45	3.81077	44.3	41	42	42	47.5	46.2	29.8	28.4	27.9	24	38.7	45.1	37.8	37.8	29.4	27	33	29.8	45.7	44
2.17	37.4	34.1	33.9	33.9	43.2	44.1	29.8	29.5	21.9	23.7	33.5	34.8	29.5	30.8	27.2	24.2	26.8	29.2	45.1	43.5	24.8	19.6	36.3		20.3	20.9	31.12	45.1	3.79514	44.2	39.6	42.3	41.5	45.3	49	28.5	29.8	29.1	24.4	42.1	44.2	36.1	37.8	31	31.4	32	29.1	42	43.5
2.18	37.4	34.7	33.4	33.4	43.4	43.6	29.8	29	21.6	23.4	34.2	34.9	29.7	32.5	27	23.7	26.5	29.1	44.3	42.6	24.8	19.9	36.6		20.3	20.5	31.052	44.3	3.77857	44.8	38.1	42.9	40.2	44.3	46.8	28.3	29.4	27.4	24.8	38.8	41.7	36.9	36.7	27.9	31.7	33.1	29.2	47.5	42.4
2.19	38	35.3	33.7	33.4	43.2	44.4	29.7	29.2	20.9	23.4	33.9	34.2	29.7	31.1	27.2	24.6	27.3	29	44.4	43.1	25.1	19.1	35.7		20.5	19.8	31.036	44.4	3.77468	45	39.1	42.2	40.9	50.4	46.3	28.7	26.6	28.2	24.4	42.1	47.6	37.3	36.9	27.8	32.3	31.4	29.8	42	42.6
2.2	37	34.5	33.6	33.9	42	44.1	29.7	30.2	21.2	23.1	34.6	33.7	29.2	31.1	27.2	24.5	27	29	44.8	42.8	25.1	19.6	36.4		19.8	20.2	30.972	44.8	3.75913	44.9	39	40.4	43.2	48.3	46.8	28.2	29	29.1	24.3	40.7	45.3	35	38.6	30.2	30.5	32.4	29.9	46.8	46.1
2.21	37.3	34.9	33	34.2	42.7	43.8	29.2	29.7	21	23.7	33	33.5	29.2	31.1	27	24.3	26.3	29	44	43.1	25.1	19.8	36.5		19.9	19.8	30.844	44	3.72812	42.5	38.2	42.6	43.1	45.2	45	27.9	29.4	27.5	24.4	41.6	41.8	37.2	39.4	31.4	29.4	32.1	29.3	44.5	43.5
2.22	37.3	34.8	33.5	33.4	43	43	29.5	29.9	21	23.4	33.3	34.5	29.7	31.6	27	24.6	27.3	29.7	43.1	42	25.2	19.1	36.6		19.8	19.8	30.884	43.1	3.7378	42.8	39.7	42.6	40.5	49	45.9	29	26.2	28	24.3	39.6	45.6	35.6	37.8	29.4	29.5	31.1	28.3	44.4	43.2
2.23	37.1	34.8	33.9	33	43.5	43.4	29.2	29.9	21.2	23.5	33	33.9	28.9	30.8	26.2	24	26.4	29.3	43.6	42	25.4	19.5	35		20.3	20.2	30.72	43.6	3.69821	44.1	37.8	41.8	42.9	48.7	47	28.3	28.1	27.8	24.4	41.2	46.8	36.2	37.3	30.6	30.5	30.2	29.1	40.4	45
2.24	36.1	34.9	33.9	33.4	43.3	44.3	29.7	29.9	21.2	24.3	33.7	34.3	29.3	31.1	26.8	24.1	27	28.5	43.5	42.4	24.9	19.8	36.5		20.3	19.9	30.924	44.3	3.74749	43.1	37.8	40.5	43.3	45.6	43.2	28.4	28.4	27.4	23	40.7	46.9	38.1	38.2	30.2	29.1	31.4	27.6	44.1	44.2
2.25	36.7	34.8	33.4	33.3	40.4	43.4	29.3	29.9	20.9	23.7	33.5	33.5	29.7	30.7	26.5	24.6	27	28.8	43	41.9	24.6	19.1	36.3		20.3	19.7	30.6	43.4	3.66937	44	38.6	43.9	42.3	48.9	46	27.4	28.7	27.9	22.4	41.8	44	36.3	36.6	30.5	28.6	31.3	28	40.2	45.5
2.26	36.7	33.7	34.2	34	42.8	43.6	29.2	30.2	20.7	23.4	33.7	35.3	29.2	30.6	25.7	24.3	26.4	29	42.9	42.1	24.6	19.5	35.8		19.5	19.5	30.664	43.6	3.68474	41.8	38.9	41	42.6	45.9	43.5	27.6	27.5	27.2	21.3	40.4	46.1	37.2	37.8	29.4	29.8	31.9	28.4	44.2	42.9
2.27	36.3	34.1	33	33.5	43	43.3	29.7	30.1	21	23.1	33.9	34.5	29.5	30.8	26.2	23.7	26.5	28.2	43	41.8	24.9	19.8	35.2		19.8	19.1	30.56	43.3	3.65978	43.5	38.2	42	44.1	46.5	46	27.5	27.4	27.8	21.9	41.7	46.3	37.3	37.9	29	29	31.4	28.5	45.6	44.2
2.28	36.2	34.7	34.4	33.6	43	43.8	29.3	30.7	21.2	24.3	32.8	34.2	29.2	30.8	25.7	23.1	26.4	28.3	42.7	41	25.1	19.5	35.1		19.8	19.1	30.56	43.8	3.65978	41.6	39	42.4	43.1	45	44.7	29	27	27.5	21.8	41.8	43.2	38.4	38.1	28.6	29.1	31.4	26.9	42.5	44.7
2.29	37	34.8	33.5	33.5	43.2	43.6	28.7	29.7	20.3	23.9	32.9	33.4	29.1	30.7	25.9	23.1	26.2	28.8	42.3	41.3	24.9	19.1	35.1		20.3	19.1	30.416	43.6	3.62537	45	37.8	42	38.3	47	45	29.1	28	27.8	21.4	41.3	44.2	37	37.3	31.3	29.4	32	28.3	45	40.1
2.3	36	34.9	33.6	33.2	42.6	43.1	29.3	30.2	20.5	23.4	32.8	34.5	29.6	30.1	25.9	23.1	26.5	29.3	42.4	40.9	25.1	19.5	34.7		19.8	19	30.4	43.1	3.62156	45.9	38.2	41	40.4	46	42.1	27.7	27.7	27.8	20.8	41.3	43.2	34.1	36.9	29.3	29.4	31.4	28.8	45	43.5
2.31	35.8	34.6	33.4	33.1	41.5	43.2	28.1	29.7	20.5	23.6	32.8	33.4	29.4	30.7	25.9	23.1	26.2	28.8	41.8	41.2	25.1	19.1	34.2		19.5	19.6	30.172	43.2	3.56744	45.8	39	40.5	42.2	47.5	40.4	29.3	28.7	27.8	20.8	42.3	46	36	36.4	29.7	29.8	30.6	26.9	42.2	43.5
2.32	36.4	34.8	33.6	34.2	42.6	44.3	28.1	29.9	19.8	22.5	33	33.7	29.7	30.4	26.1	22.8	25.3	28.8	42.6	40.6	25.3	19.1	33.4		19.1	19.6	30.228	44.3	3.5807	44	39	42.6	44.6	45.3	44	29.4	28.3	27.4	20.2	40.3	46.3	37.9	34.6	28.3	30.1	29	27.8	42.2	43.9
2.33	36	34.8	33.2	33.4	42.5	43.3	28.5	29.4	20.5	23.4	33	33.4	29.3	30	26.2	22.8	26	29	42.2	41.2	24.9	19.6	32.8		18.4	19.1	30.116	43.3	3.55421	43.5	37.3	38.7	40.5	47	41.3	29.1	29	26.5	20.8	37.9	41.1	38.7	37.2	29.1	29.8	31.3	27.9	43.9	42.3
2.34	36.3	34.2	33.4	33.1	42.6	44.3	28.5	29.3	20.5	23.4	32.4	34.2	29.2	30.4	25.6	23	26	29	42.2	41.6	25.2	19.1	33.5		19	19.6	30.224	44.3	3.57975	44.7	35	40.4	42.9	44.9	44.6	27	27.8	27.2	21.8	38.8	44.4	37.9	38.7	29.8	28.6	31.8	27	44.7	43.6
2.35	35.9	34.8	34.1	34.1	42.3	43.5	28.5	28.6	20.2	22.8	32.6	34.2	29.2	30.4	25.9	22.8	26.1	28.5	41.6	40.9	25.4	19.6	34.2		19.2	19.1	30.18	43.5	3.56933	40.2	39	38.4	40.5	47.2	44.9	27	27.1	26.6	21.9	39.6	46.2	37.9	39.1	28	29.8	28.8	27.4	44.7	43.6
2.36	36.1	34.8	33.4	33.6	42.1	42.8	28.6	28.9	20.9	23.1	31.7	33.3	29	30.1	25.4	22.5	25.9	28.5	41.9	40	25.1	19.9	33.5		19.5	19.1	29.988	42.8	3.52406	45	42.1	41	41.6	46.3	41.9	26.7	26.6	27.5	20.8	39.1	44.5	37.2	37.3	29.4	30.2	30.2	27.8	44.9	42
2.37	35.3	35.3	34.2	32.3	40.3	43.5	27.9	29.2	19.9	22.8	32.6	33.2	28.4	30.6	25.9	22.8	25.9	28	41.7	40.3	25.1	20.1	33.6		18.5	19	29.856	43.5	3.49311	42.6	41.5	40.1	42	48.7	42.5	28.3	26.9	26.7	21.5	37.8	43.9	38.7	37.5	29.1	30.3	28.7	27.8	45.2	40.8
2.38	36	35.5	33.4	33.3	43.1	43.5	27.8	29	19.9	22.9	31.1	33.7	28.7	29.5	25.1	23	25	28	40.8	40.9	24.9	19.9	32.9		18.9	19.1	29.836	43.5	3.48843	43.9	37.6	41	40.4	47.5	40.3	26.7	27.1	27.9	20.9	39	43.3	36	37.2	29	29.1	28.4	28.6	44.2	40.1
2.39	35.9	35.4	33.7	33	41.1	42.7	28.4	29.2	19.9	22.8	32.2	34.5	29.2	29.9	26	23.4	25.4	29	41.1	40.4	25.2	20	32.6		19.1	19.6	29.988	42.7	3.52406	44.2	37.2	40.5	40.9	45	45.3	27.8	26.6	27.5	21.3	41.8	45	36.7	36.3	28.4	29.1	29.1	27.8	44.3	42.5
2.4	35.9	35.4	33.9	33.3	40.9	42.7	27.9	29	19.8	22.9	31.8	34.2	28.6	30.4	25.1	22.8	25.2	28.5	41.3	41.4	25.8	19.5	33		18.7	19.1	29.884	42.7	3.49966	42.6	39.6	42.2	38	45	39.7	29.1	26.6	25.8	20.9	42.1	44.3	36.2	37.2	28.3	29.2	27.6	27.3	40.1	42.1
2.41	34.7	35.3	33.3	34.5	41.3	43	28.3	28.7	19.9	22.5	31.8	33.5	28.5	29.7	25.4	22.7	25.4	29	41.3	40.1	25.1	19.8	33.1		19.1	19.1	29.804	43	3.48095	45.8	39.1	41	43.3	46	42.3	29.1	26.1	27.4	21.8	37.7	46	36.2	36.9	28.6	29.4	29.9	27	40.6	40.5
2.42	35.3	34.8	33.7	33	41.8	42.6	28.5	29.2	20.5	21.9	31.8	34.2	28.4	29.4	25.2	23	25.9	29	40.8	40.4	25.2	19.8	32.2		19.6	19.6	29.832	42.6	3.48749	44.5	37.3	40.8	39.5	45.9	42.3	27.9	27	27.9	21.9	39.5	46.7	35.9	36.9	26.6	29.9	30.2	24.4	41	43.6
2.43	35.3	34.9	31.7	33.7	42.2	43.2	28.5	28.6	20.2	22.5	31.8	34.7	28.4	29.2	23.7	23.6	25.4	28.3	41.2	39.4	24.6	19.5	33.1		18.8	19.5	29.68	43.2	3.45205	41.5	37.9	43.9	40.2	44.5	44.6	27.9	27	27.9	22.4	37.3	46.1	37.3	36	27.8	29.4	29.1	25.8	44.1	42.2
2.44	35	35.4	33.9	33.7	42.6	43.2	28.5	29.2	19.9	23	32.2	34.4	28	29	24.6	24	25.1	28.8	40.6	40.3	24.6	19.5	32.4		19.2	19.1	29.848	43.2	3.49124	42.4	37.9	41	39.3	44.7	44	27.9	26.7	27.1	23.5	39.1	41.3	34	37.5	28.7	28.6	29.4	25.8	42.7	41
2.45	33.9	33.9	33.4	32.7	41.3	43.2	28.5	29	20.5	22.2	31.8	34.5	28.8	29.7	25.2	23.6	25.1	28.5	39.7	39.8	25.4	18.4	31.9		19.2	19.1	29.572	43.2	3.42697	40.8	39.9	40.9	41.7	45.8	42.4	27.8	26.7	27	21.7	39.1	43.5	34.4	35.6	29.1	29.1	27	27.5	42	38.4
2.46	34.7	35.4	33.2	33.5	41.9	43.1	28.4	29.3	20.5	22.8	31.7	34.4	28	29	24.7	22.8	25.6	29	40.9	39.7	25.4	19.5	32.2		19.9	19.1	29.788	43.1	3.47721	46.1	38.4	42.1	39.1	46.5	43.3	27	25.3	26.5	22.3	39.3	43.8	36.6	34.3	29.2	27.8	29.5	25.7	42.6	39.8
2.47	34.7	35.4	33.4	33.3	42	42	29.2	29	20.2	23.4	31.3	33.9	28.5	29.2	24.2	23.5	25.1	28.5	40.9	39.4	24.9	19.8	32.2		19.5	19.6	29.724	42	3.46229	45.5	37.9	38.7	39.6	44.3	40.4	27.8	25.3	25.3	23	39.1	45.5	33	36.3	29.8	27.1	29.5	27.1	38.3	42
2.48	35.6	35.2	31.7	33.4	41.5	42.9	28.5	28.3	20.9	22.7	31.4	34.8	28	29.2	23.9	24.1	24.9	28.2	40.6	39.6	24.8	20.2	32.4		19.8	18.8	29.656	42.9	3.44646	41.3	38.1	43	39.3	47.7	42.5	28.3	25.3	27	23.1	40.4	42.3	34.8	38.1	29.3	27.8	28.4	25.8	39.2	40.9
2.49	35.3	35.6	34.5	33.4	41.3	42.5	28.2	28.3	19.8	23	32.4	34.5	28	29.3	24.6	23.4	25.2	28.1	40.8	39.4	25.1	20.2	31.7		19.9	19.5	29.76	42.5	3.47068	41.5	39.6	40.7	41	43.4	40.2	25.8	25.3	27	21.8	40.4	43.5	32.6	37.9	28.9	27.5	28.7	25.3	41.8	40.5
2.5	34.7	35.9	32.5	33.3	42	42.3	28.8	28.5	19.8	22.9	32.2	34.2	28.5	28.8	24.8	23.3	25.1	27.8	40.9	39.4	24.9	20	31.8		19.2	19.1	29.628	42.3	3.43996	42.8	37.2	37.3	39.1	43.6	40.2	26.9	25.7	27.8	22.8	37.3	43.5	35.3	35.7	29	26.2	27.9	26.1	39	38.1
2.51	35	34.9	33.2	34.2	41	41.8	29.3	28	20.1	23.1	32.1	34.2	28	28.5	25.1	22.9	24.8	27.8	40.1	39.1	25.1	19.9	31.9		19.1	18.8	29.52	41.8	3.41493	41.3	37.5	42.5	39.6	44.9	42.2	26.6	25.2	26.2	23.1	39.6	46	35.1	34.3	28	27.1	28.3	25.3	39.9	37.8
2.52	34	35.2	32.6	33.5	41.3	42.7	28.5	28.5	20.2	23.4	32	34.8	28.5	28.8	24.9	22.8	25.1	28	40.5	39.5	24.9	19.5	32.2		19.2	19.1	29.588	42.7	3.43068	43.5	39.6	41.2	39.6	43.1	41.2	27.4	25.2	26.2	20.2	39.1	42.9	35.9	36.8	26.4	27	27.8	25.2	37.8	42.1
2.53	35.3	35.2	33.3	33.4	40.7	42.5	29	28	19.8	23.4	31.8	33.6	28.3	28.5	25.4	22.8	24.7	28	40.5	38.5	24.6	19.6	31.3		19.1	19.1	29.456	42.5	3.40014	40.4	39.6	42.1	37.9	43.4	41.5	27	24.3	26.1	20.3	40.4	45.2	34.5	34.5	27.9	28	29.1	24.4	42.6	40.3
2.54	34.2	35.3	33.4	34.9	41.1	42.9	29	28.2	20	23.1	31.8	33.4	28.2	29	25.8	22.8	25.2	27.9	39.7	39.4	24.5	19.6	30.9		19.1	18.7	29.524	42.9	3.41585	41.4	39.1	40.2	40.2	43.4	41	27	24.3	24.9	19.7	39.5	44.3	33.7	36.1	27.5	27	29	23.9	42.6	41.8
2.55	34.1	35.1	33.3	35.2	40.8	43.2	29	27.2	19.9	23.3	31.9	34.8	27.9	28.8	25.1	23.1	25.7	28.2	40.1	38.3	24.6	19.6	31.1		19.8	19	29.564	43.2	3.42511	44.4	39.6	39.1	39.5	46	42	27	24.3	25	21.8	39.1	45.1	32.4	36.6	28.7	27.5	27.8	25.3	39.5	39.1
2.56	34.3	35.3	33.4	34.2	40.2	41.5	29	27.2	20.3	23.4	32.2	34.2	27.8	28.6	24.6	22.8	25.2	28	40.4	38.5	24.6	19.6	31.4		19.1	18.8	29.384	41.5	3.38353	41.7	36	41.5	39.1	46.4	43.5	25.7	25.8	26.1	21.8	41.6	45.6	34.3	36.2	26.6	27.1	27.8	25.2	40.1	40.9
2.57	34.5	34.1	33.5	34.2	40.6	41.8	28.7	28	21	23.4	31.8	34.5	27.2	28.3	25.5	22.3	24.8	28.1	39.5	39	24.8	19.6	30.9		18.8	19.1	29.36	41.8	3.37801	42.7	38.4	40.9	39.8	44.2	42.1	27	26.1	25.8	20.2	41.2	44.3	32.1	33.4	27	27.5	27.9	23.8	41	39
2.58	34.3	35.2	33.5	34.7	41.4	41.9	29	27.2	20.5	23.4	31.8	34.9	27	28.8	25.4	22.8	25.1	27.9	38.6	39	24.8	19.1	31.1		19.1	18.8	29.412	41.9	3.38999	43.1	38.4	41	39.1	44.6	40.8	27	25.2	24.8	20.2	41.6	40.5	31.6	35.1	27	27.8	25.2	23.9	37.7	42.1
2.59	34.9	35.2	33	34.3	39	41.9	29.3	27.2	20.6	23.3	31.8	33.9	27.8	28.5	26	22.7	24.3	28.6	39.7	39	24.7	19	30.7		19.6	19.6	29.384	41.9	3.38353	40.5	38.1	39.8	37.3	44.5	41	27.3	26.2	26	19.7	37.9	42.7	32	36	29.1	28.4	27.5	24.9	42.6	40.5
2.6	35.1	35.8	32.6	34.2	40.7	41.8	29	27.2	20.7	23.4	32.8	34.6	27.2	27.2	25.1	22.8	24.7	27.5	39.5	39.4	24.6	19.1	30.7		19.6	19.1	29.376	41.8	3.38169	43.5	41	41.5	37.8	46.3	42.1	27.9	26.1	26.1	19.7	41.6	41.9	32	35	27.8	27.8	27.5	23.9	42.6	40.7
2.61	34.5	35.7	32.1	33.5	40.9	41.5	28.5	27.2	19.8	23.1	31.8	33.9	27.2	27.8	25.4	23.4	25.1	28.1	40.1	38.4	24.4	19	29.3		19.1	19.2	29.16	41.5	3.33214	42.4	38.4	39.9	39.1	42.5	41.8	25.8	25.6	25.9	20.3	41.3	43.6	32.4	34.1	29.1	27.4	27.7	23.4	41.3	38.5
2.62	34.1	35.1	33	33.4	40.9	40.9	28.3	27.2	20.2	23.5	32.2	34.8	26.7	27.2	25.1	23	24.6	26.9	39	38.6	24.7	19.8	30.6		19.1	19.1	29.12	40.9	3.32301	42.7	39.2	39.7	37.9	44	42	28.1	25.3	24.8	18.5	42.9	44.7	33	34.1	29.1	27.4	26.7	24.1	41.3	39.7
2.63	35	35.9	32.8	33.7	40.4	42.3	28.3	27.8	20.6	22.8	31.7	34.7	26.4	27.7	24.6	22.8	24.7	27.9	39	38.2	25.2	19.1	30.6		19.2	18.7	29.204	42.3	3.34221	38	38.3	39.8	37.2	43	42.1	27.9	26	25.2	18.5	41	42.3	30.6	36.2	28.6	27.8	25.8	22.3	39.9	39.9
2.64	33.9	35.5	32.1	33.2	39.4	41.3	28.5	27.3	20.2	23.1	32.2	33.5	26.4	27.7	24.5	23.1	25.1	27.9	39	38.2	24.8	19.1	30.7		19.9	18.7	29.012	41.3	3.29841	43.1	38.7	39.6	39.9	42.5	42.9	27.8	24.9	24.7	19.7	40.4	45.9	31.7	35	29	27	24.4	21.7	39.2	37.5
2.65	34.5	35.3	32.2	33.7	39.9	41.2	28.8	27.2	19.9	22.7	31.7	34.2	26.7	27.3	24	23.4	24.6	27.3	38.7	37.7	25.2	19.8	29.3		19.5	18.6	28.936	41.2	3.28115	44.3	38.1	37.9	40.7	42.6	39.6	27.5	25.5	25	19.1	38.2	44.5	31.3	35.1	28.9	27.9	26.1	22.3	37.5	36.7
2.66	34.9	34.8	32.4	33.6	40.9	41.1	28.5	26.7	19.8	22.8	31.5	34.2	26	26.9	24.8	23.4	24.3	27.3	38.6	38	24.5	19.2	30		19.1	18.8	28.884	41.1	3.26936	41.9	39.2	38.2	36.7	42.6	40.4	26.9	25.5	23.5	18.4	40.8	42.9	33.2	34.8	29	26.1	26.1	20.8	38.5	39.1
2.67	34.7	34.5	31.8	33.1	40.9	41.7	28.5	27.3	19.8	23.5	32.5	33.4	26.4	27.9	24.5	24.6	24.3	28	38.8	38.2	24.5	19.4	29.7		19.1	17.9	29	41.7	3.29568	43.5	40.2	39	38.2	45	41.5	27	24.1	24.3	18.5	40.6	43.6	32	34.9	27.8	27.8	24.6	20.2	39.9	41
2.68	34.8	35.5	32	33.7	40.4	41	29.3	26.5	19.5	22.3	32.1	33.7	26.4	27.5	24.6	24.9	24.9	27.2	38.8	38.3	23.8	19.1	29.2		19.1	18.7	28.932	41	3.28024	42.9	39.3	39.1	37.2	42.1	42.1	27	24.7	23.9	19.1	40.6	39.9	33.1	33.8	28.3	26.3	25	18.1	41.2	39.6
2.69	34.7	34.5	31.9	33.2	39.9	41.3	29	27.2	19.6	22.5	32.8	33.7	26.5	27.5	24.8	24	24.6	26.6	38.4	38.4	24.6	19.4	29.7		19.1	19.3	28.928	41.3	3.27933	42.7	38.9	37.8	39.8	44.5	41	27.5	24.8	23.9	19.1	39.5	42.6	30.6	34.8	28.4	25.9	25.2	17.5	37.6	38.1
2.7	34.9	35.3	32.8	33.7	39.2	41.1	28.8	26.8	19.6	22.8	31.9	34.5	25.9	27.5	25.1	24.6	24.8	26.5	38.6	38.5	24.6	19.2	30		19.2	19.2	29.004	41.1	3.29659	42.9	37.2	40.1	40.2	45.3	39.3	25.3	25.3	23.4	18.5	38.7	42.9	32	35.5	29.6	24.8	24	18	37.7	38.4
2.71	34.2	35	32.2	32.9	40.4	41.4	28.3	26.3	19.8	22.2	32.5	33.9	26.2	27.5	24.9	23.6	24.6	26.9	37.9	38.5	24.6	19.8	29.3		19.8	18.7	28.856	41.4	3.26303	40.2	39.2	40.4	37.6	45.5	40.4	25.2	25.3	22.4	20	39.6	44.7	30.1	34.8	28.9	25.9	25.8	17.7	39.2	41.6
2.72	33.6	35.3	31.5	33.1	39.8	40.5	28.6	26.5	19.9	22.8	33.1	34	26.6	26.8	25.4	24.6	24.3	27.3	38.5	38.4	24.1	19.6	29.6		19.5	19.2	28.904	40.5	3.27389	45.3	41	39.1	36.9	44.3	40.9	26.7	24.3	21.8	19.7	40.8	41.9	30.1	33.8	27.4	23.7	24.8	15.7	39.5	37.2
2.73	34.9	34.7	33.2	32.4	39.7	40.4	28.5	26.4	19.2	22.8	31.7	34.2	25.9	27.2	25.1	24.6	24.6	26.8	37.3	38.1	25.1	19.5	29.3		19.8	18.4	28.792	40.4	3.24857	40.2	37.6	37.6	37.3	44.5	38.1	27.1	25.2	23.9	20.1	41	44.6	32	34.8	28.5	24.9	23.2	15.8	40.4	39.1
2.74	33.8	34.8	31.9	33.5	39.6	40.1	27.9	26.9	19.2	21.8	32.5	33.8	25.9	27.7	24.9	24.8	24.6	25.9	37.4	38.3	24.6	20	29.3		18.8	18.7	28.668	40.1	3.22065	37.8	39.6	40.7	37.2	41	38.7	26.2	24.3	22.9	20.2	39.3	45.9	29.8	34.2	27.8	24.9	23.3	15	38.4	41
2.75	35.1	34.2	33.3	33	40.1	40.4	28.5	26.1	19.5	22.5	32	34.4	25.6	27.5	25.2	24.6	24.6	25.1	37.3	38	24.6	19.6	29.7		19.1	18.7	28.748	40.4	3.23865	43.5	39.6	40.9	38	41	38.1	27	24.3	23	20	37.9	46.8	29.8	31.3	27.4	24.3	22.9	11.9	36.4	39.5
2.76	33.6	34.2	32	32.8	40.3	40.5	28.5	27	19.9	21.8	32.2	32.9	25.9	27.7	25.5	24.5	24.6	25.9	37.3	38	24.6	19.1	29.8		19.4	19.1	28.684	40.5	3.22425	43.9	39	41	39.1	41.3	41.5	25.3	25	21.8	19.8	39.6	44.3	31.3	35.1	27	23.8	23.8	11.5	38.7	37.8
2.77	33.7	34.7	33.3	32.2	39.5	40.5	28	27.2	18.3	22.8	32.5	34.2	25.7	27	25.1	24.6	24.1	26	37.3	38	24.9	19.1	29.6		19.1	18.8	28.648	40.5	3.21616	41.9	39.6	40.7	40.3	41.8	40.3	25.7	25.3	22.4	20.5	42.1	40.9	29.1	33.7	27.9	24.9	24.3	9.2	39.1	38.1
2.78	34.5	34.7	32.9	33	38.2	40.2	28.5	26.8	18	22.4	32.4	34.9	25.1	27	25.4	24	24	26	37.3	38.8	24.9	19.5	29.2		19.4	18	28.604	40.2	3.20629	38.7	38.7	37.6	37.2	39.6	36.6	26.7	25	21.9	21.8	39.7	41.6	30.9	34.7	27	25.3	22.3	8.6	40.6	39
2.79	34.7	34.2	33	32.8	39.4	40.2	28.5	27.2	18.4	22.5	32.7	33.7	25.7	26.7	25.7	23.4	23.8	25.6	37.2	38.4	25.2	18.8	29.1		19.1	18.4	28.576	40.2	3.20001	38.7	41.3	37.9	38.4	42	38.9	25.7	24.4	20.2	20.8	40.4	45.3	27.8	33.7	25.9	24.2	23.9	6.5	40.4	39.1
2.8	34.9	34.8	32.8	33.2	38.7	40.4	28.8	26.9	18.3	22.4	32	34.2	25.9	27.4	25.3	23.4	24	25.1	37.5	38.5	25.1	19.2	29.7		19.1	18	28.624	40.4	3.21077	39.6	36.4	37.9	39.3	40.3	40.2	25.4	24.4	19	21.5	37.3	44.6	29.8	34.7	26.9	26.1	22.4	6.4	37.3	38.8
2.81	33.1	35	32.5	32.1	39.2	39.7	28.7	27.3	18.7	22.5	31.8	34.7	25.1	26.9	24.1	23.4	24.4	25.1	37.6	37.9	25.2	19.6	29.8		19.2	18.3	28.476	39.7	3.17765	42.4	37.2	39.6	35.7	42.6	42	24.4	23	18.5	21.1	38.1	41.7	29.3	31.6	26.6	25.3	22.4	6.5	37.2	41
2.82	35.3	33.4	32.2	32.6	39.2	37.9	28.7	27.5	18.3	21.5	32.2	34.1	24.8	27.2	24.8	24.1	24.3	24.5	37.7	37	25.4	19.6	30.1		19.1	18	28.38	39.2	3.15626	41.6	37	39.3	35.4	44.2	40.3	25.3	23.4	17.8	20.2	38.4	41.1	28.7	33.4	27.7	25.2	21.3	6.1	37.5	36.7
2.83	34.9	33.7	33.5	33.5	39.4	39.8	28.8	27.3	17.9	21.5	32.2	34.1	25.1	27.2	25.1	24.3	23.5	25.1	36.9	36.9	24.6	19.1	29.5		19.1	18	28.44	39.8	3.16962	42.6	38.1	36.9	38.2	40.7	36.9	24.3	23	17.1	20.1	39.1	42.4	27.4	34	26.6	24.3	21.8	6.1	36.1	38.7
2.84	34.7	34.2	33.3	33.1	39.3	39.7	29	27.5	18.3	20.9	32.6	33.7	25.7	27.2	24.6	24.1	23.2	24.3	36.5	37.2	24.6	19.1	29.2		19	18	28.36	39.7	3.15182	42.8	40.5	42.1	38.5	40.9	39.2	25.3	24	17.8	19.6	39.1	41.5	30.1	33.7	26.6	26.9	22.9	6.2	40.4	38.5
2.85	34.3	34.2	32.6	33.5	38.8	40	29	27.2	17.9	20.2	32.6	33.9	25.1	26.9	24.2	24.7	24.6	24.6	36.5	37.2	24.9	19.1	29.2		19.4	18.1	28.348	40	3.14915	41.8	38.4	39.9	36.3	42.1	39	23.9	23	17.8	19.6	40.7	42.2	26.6	33.6	25.8	25.2	21.9	6.1	39.6	39.4
2.86	34.3	33.4	32.4	32.8	39.4	39.7	28	26.4	18.1	19.8	32.4	33.9	25.1	26.5	23.9	24.6	23.7	24.2	35.9	37.7	24.9	19.5	29.3		19.1	18.3	28.132	39.7	3.10134	43.2	39.3	38.6	39.3	40.7	39.6	26.6	22.9	17.2	20.2	39.9	44.2	28.6	30.2	27	25.3	22.4	6	37.6	38.2
2.87	34.1	33.1	33.3	33	39	39.4	28	27	18	20	32.2	34.2	25.4	26.5	23.5	24	24	24	37.7	37.4	24.2	19.2	29.2		18.6	18.1	28.124	39.4	3.09958	43.1	36.7	39	37	40.9	39	24.8	22.3	18.3	19.7	39.1	42.9	25.9	32.7	27.8	25.2	20.9	6.1	36.3	38.7
2.88	34.3	33	33.4	32.5	39	38.5	28.9	26.8	18.1	19.3	32.1	33.6	24.6	26.5	23.4	24	23.4	23.1	36.9	37	23.9	19.1	29		19	18	27.896	39	3.04953	44.3	39.5	39.1	38.8	42.5	37.4	25.7	23	19.7	20.9	40.7	42.4	26.5	32.7	27.1	24.3	21.3	6.2	38.1	38.8
2.89	34	32.8	32.4	33.4	38.8	38.9	28.1	26.6	18.4	18.3	31.9	34.2	24.9	26.5	23.1	24.2	24.5	22.8	36	37.6	24.5	19.2	29		19.5	18	27.904	38.9	3.05128	43.1	39.3	39.6	36.6	41.6	40.2	25.2	22.9	20.1	18.4	42.4	41.4	26	33.4	27	24.4	20.8	6.2	36.3	38.1
2.9	34.9	33.7	33.1	34.7	38.6	39.4	28.8	26	18.4	19.5	32.1	33.7	24.6	26.5	23.1	25.1	24.6	22.8	36.5	36.9	24.6	19.1	28.5		19.1	17.2	28.06	39.4	3.08549	44.2	40.7	38.3	37.9	39.7	34.7	25.2	23	20.3	19.7	38.1	39.1	26	33.6	27.1	23.9	20.8	6.1	37.2	39.6
2.91	34.2	33.2	33.8	33.7	39	39.8	28.8	26.2	18.2	19.8	32.6	34.2	24.6	26.2	23.1	24.6	23.5	22.5	36.3	37.3	24.5	19.5	28.5		19.2	17.6	28.036	39.8	3.08021	44.5	37.2	37.2	38.7	40.6	37.9	24.9	22.9	19.8	21.3	37.4	41.6	25.3	32.9	27	24	19.7	6.1	39.1	36.5
2.92	34.7	32.8	34.2	33.7	39	39.1	28.3	25.6	18	21	33	33.5	25.2	25.9	23.1	24.5	23.4	22.4	37.1	36.9	24.3	19.1	28		19.2	17.2	27.968	39.1	3.06529	44.4	37.5	39.8	38.1	40.7	39.6	25.3	23.4	21.9	20.9	42	41.5	25.2	32.4	27.9	23.3	19.7	6	36.3	38.1
2.93	34.8	33	33.6	32.5	37.5	38.8	27.8	26	18	20.2	32.6	33.1	24.6	25.9	23.1	24.7	23.4	22.5	36.9	37.1	24.2	19.1	27.8		19.5	17.6	27.772	38.8	3.02248	44.8	38.4	39.5	40.2	41.8	38.4	24.2	21.8	24	19.7	39.8	40.4	25.3	33.6	27.5	22.9	18.4	6	36.9	39
2.94	33.3	33.3	33	33.5	38.1	38.8	28.5	25.9	18.8	20.9	31.9	32.6	24.6	26	23.4	25.1	22.8	22.2	36.6	37.3	24	19.1	28.6		19.1	17.2	27.784	38.8	3.02509	42.4	37.1	39.3	39.1	39.9	39.3	24.8	22	23	20.3	39.8	42.3	23.3	32.2	27	22.4	18.5	6.1	39	40.5
2.95	34.7	33.4	33.4	34.5	39	39.4	27.8	25.9	18.3	20.5	32.7	33.5	25.1	25.9	23.4	25.1	23.4	22.2	35.4	36.5	24.8	19	28		18.8	18	27.948	39.4	3.06091	42.7	37.7	39.6	41	40.5	36.9	24.3	21.7	24	20.2	40	41.6	21.9	32.1	28.3	23.3	17.2	6.2	35.4	37.9
2.96	34.9	33	33.2	34.1	37.9	38.6	28.2	27	18.4	21.2	32.8	34.5	25.1	25.7	23.5	24.8	23.4	21.8	36.4	37.3	24.6	19.1	27.5		19.1	17.2	27.972	38.6	3.06617	43.5	35.9	39.1	39	37.5	36	24.2	21.3	23	20.2	40.2	42.9	20.8	32.7	27.5	23.3	16.5	6.2	35.6	38
2.97	34.7	33.4	33.9	33.3	39	37.9	28.5	25.9	18.4	19.9	33.1	33.4	24.6	26	24	25.1	23.5	22	36.2	37.2	24.3	19	27		19.2	17.5	27.88	39	3.04603	43.5	34.1	39.6	39	36.4	36.1	23	22.7	24.9	19.6	40	44.3	22.3	32.1	27.4	22.9	15	6.3	38.1	39.1
2.98	34.8	33.9	33.6	33	37.6	38.8	28	26.5	18	20.9	32.4	33.2	25.1	25.2	23.4	24.6	22.9	21.2	35.9	37.2	24	19.1	27.3		19.1	17.1	27.712	38.8	3.00943	41.5	34.9	39.9	39.8	37.9	37.8	24	21.8	25.2	18.5	40.6	44.2	21.3	30.6	27.5	24.3	15	6.2	37	37.6
2.99	34.2	32.9	33.4	33.3	38.3	37.7	28	26.2	18.3	21.2	32.2	33.3	25.1	25.7	24.2	24.8	22.8	20.2	36.4	36.7	24.7	19.5	26.8		19.6	17.2	27.708	38.3	3.00856	42.5	36.5	40.7	39.1	41.8	36.3	24.3	21.8	25.3	19.6	40.3	42.6	20.2	32.4	27	22.3	12.4	6.3	36.3	39.3
3	33.9	33.5	33.4	32.1	37.3	37.7	27.5	26.5	17.5	20.5	32.5	33.1	25.1	25.4	24.6	24	22.5	19.6	35.9	36.4	24.6	19.1	27.2		19.1	17.6	27.464	37.7	2.95581	45	39.2	39.8	39.6	41	37.8	24.3	21.9	25.2	18.6	40.6	41.9	20.3	32	27.8	22.9	13.3	6.3	36.9	36.3
3.01	33.8	33.2	33.7	33	38.4	37.3	28.5	26.5	17.6	21	32.8	33.7	24.8	25.3	24	24	22.8	19.1	35.9	36.8	25	19.1	26.5		19.6	16.8	27.568	38.4	2.97824	44.2	35.9	38.7	39.6	39.7	35	23.4	20.8	24.4	18.4	40.8	40.4	19	31.3	28.3	24	10.6	6.3	36.6	39.8
3.02	34.5	33.3	33.8	33.1	37.3	37.7	27.3	26.4	17.2	20.9	32.1	33.7	24.6	25.3	23.3	23.5	22.5	18.8	36	36.5	24.2	19.5	26.7		18.8	17.1	27.364	37.7	2.93432	41.5	39.4	39.1	39.8	38.2	34.9	24.4	21.9	22.3	19.7	40.5	41.3	17.2	30.4	26.5	23.8	11.4	6.1	37.2	38.7
3.03	34.9	33.1	33.4	33	37.3	37.3	28	26.3	17.3	20.2	32.2	33.3	25.7	25.9	23.4	23.7	22.2	18	36.1	36.3	24.6	19.5	26.2		18	17.6	27.34	37.3	2.92918	39.4	40.2	39.7	39.4	38.8	37.3	23.4	21.3	23	18.9	40.9	40.6	17.2	31.9	27.8	24.4	9.2	6.1	38	38.7
3.04	35.3	33.3	34.5	32.7	37.7	37.1	28.3	26.2	17.6	20.2	32.2	32.2	25.1	25.4	22.8	23.4	21.6	17.1	34.7	36.4	24.6	19.8	25.9		19.6	17.2	27.236	37.7	2.90693	45.8	35.7	38.1	39.2	38.4	37.2	24.7	20.1	22.9	18.5	40.9	40.4	15.9	30.6	27.5	24.9	8.3	6.2	37.9	35.7
3.05	34.7	32.8	33.7	33.4	37.5	37.1	28	26.5	17.6	21.2	32.6	32.5	24.3	24.6	23.6	24	21.6	16.3	36.1	36.1	24.2	19.5	25.9		19	16.4	27.168	37.5	2.89244	44.3	38.9	39.3	39.6	37.2	35.7	24.9	20.8	22.5	20.2	40.5	42.1	13.4	31.7	27.5	22.9	6.4	6.2	37.2	39.1
3.06	34.2	32.9	34.3	33.1	38.1	36.2	28.3	27.1	16.7	19.5	31.9	33	25.4	24.5	22.8	23.7	21.6	15.9	36.4	36.3	24	19.2	25.4		19.1	16.7	27.052	38.1	2.86779	42.7	40.5	38.6	39.6	37.3	34.8	23.4	21.9	23.4	18.9	40.2	41	13.4	29.8	24.3	25	6.8	6.1	37.5	37.9
3.07	35.4	33	34	32.8	37.7	36.1	28.6	25.8	17.2	19.9	32.4	32.5	25.5	24.8	22.8	23.7	21.6	14.9	35.9	36.3	23.8	18.2	25.1		19.1	16.6	26.948	37.7	2.84578	45.5	36.2	38.1	38.4	37.5	34.4	24.3	20.1	23	18.5	41	41.8	11.7	29	25.3	24.2	6.1	6.1	37.8	39.1
3.08	35.2	32.5	33.8	33.4	38.1	35.9	29.3	25.9	16.8	19.8	32.6	32.2	25.1	24.6	21.8	23.4	21.5	14.5	35.8	35.9	24.6	19.2	24.9		18	15.8	26.824	38.1	2.81965	44	35.5	36	37.8	37.9	36	23.4	20.8	23	19.4	41	41.3	10.6	29.9	27.1	25.1	6.2	6.2	36.6	37.9
3.09	34.8	33	33.5	31.9	37.3	36.8	27.9	26.5	16.8	19.9	33.1	32.4	25.7	25.1	22.8	23.6	21.2	13.4	36.2	36.1	24.3	18.4	25.1		19.1	16	26.836	37.3	2.82218	40.4	40.5	39.3	37.7	37.2	37.6	22.4	21.9	21.9	18.6	39.1	41.5	9.3	27.8	26.7	24.3	6.1	6	36.7	36.2
3.1	34.9	32.2	35.1	32	38.3	36.1	28.7	25.7	17.2	19.1	31.8	30.6	24.9	24.2	22.4	24.3	20.9	12.8	35.7	36.2	23.8	19.2	25.2		18.7	16.8	26.672	38.3	2.78779	41.5	40.5	38.7	40.6	38.5	35.6	23.8	20.8	21.9	18.4	38.5	42	8.4	26.6	25.2	23.5	6.1	6.1	37.4	36.8
3.11	34.2	32.4	33.9	32.2	37.3	35.2	28.1	25.9	17.3	19.1	32.6	31.7	25.1	24.2	22	23.6	21.2	11.8	36.2	36.3	24	18.9	25.3		18.8	15.9	26.528	37.3	2.75777	46.3	37.3	38.7	37.7	35	35	22.9	21.9	22.9	17.9	37.9	40.4	8.1	27.9	25	21.8	6.3	6.2	37.2	38.7
3.12	33.9	32.5	35.2	32.2	37.2	36.1	28	26	17.2	18.8	32.6	31.7	25.7	24.6	21.2	23.7	19.8	9.9	36	36	24.3	18	24		18.8	15.8	26.368	37.2	2.7246	44.3	37.9	37.5	39.8	39	36.4	22.9	21.8	22.9	17.7	42.1	42.4	7.6	27	25.3	22.3	6.2	6.1	36.3	39.6
3.13	34.7	33.2	32.9	32	37.1	36.1	28.1	26.2	17.2	18.8	31.9	31.8	25.1	25.1	21.2	23.7	20.9	8.4	35.5	35.4	24.3	17.8	24.2		18.8	15.9	26.252	37.1	2.70068	39.9	35.6	36.3	40.8	38.8	34.4	24.3	21.8	21.3	18.4	39.9	41	6.8	25.2	26.8	22.5	6.4	6.5	36.9	38.4
3.14	34.2	33	34.3	31.5	38.3	35.5	28.2	25.9	16.3	19.1	31.5	30.7	24.7	24.1	21.2	23.3	20.2	7.2	36.3	35.5	24.6	18.7	24.2		18.3	15.8	26.104	38.3	2.67032	44.5	39.6	37.9	39.6	36	33.8	22.9	21.9	22.9	17	41	39.6	6.5	22.9	27.2	21.3	6.1	6.2	35.8	37.5
3.15	35.6	32.8	34.2	32	37.2	34.5	28	24.7	16.4	18.7	31.7	30.3	24.6	23.9	21.1	23.1	21	6.8	36.5	36.2	25.2	18	24.2		19.1	15.8	26.064	37.2	2.66214	44.5	37.2	39.1	39.5	37.3	34.6	23	20.3	22.3	19.2	40.2	40.2	6.2	21.3	24.1	20.1	6.2	6.2	33.8	39.3
3.16	34.5	32.8	34.7	32.8	37.1	34.2	27.9	25.1	16.4	18	31.2	29.6	24.6	24.9	21.1	23	19.8	5.1	35.3	35.6	24.7	18.8	24.3		18.1	15.9	25.82	37.1	2.61253	42.3	37.2	38.4	38.4	34	35.7	21.3	20.8	22.4	19.3	41.3	40.3	6.4	20.1	25.6	18.7	6.3	6.2	36.4	37.9
3.17	33.7	33	34.7	32.2	37.5	35.3	28	25.8	16.6	17.9	31.9	30	24.6	23.8	21.6	22.9	19.9	5	36.4	35.3	24.7	18	23.4		19	15.9	25.884	37.5	2.6255	43.5	39.6	38.1	35.2	35.6	33.5	22.9	20.2	20.8	18.4	40.5	41.7	6.8	19	26.7	20.1	6.2	6.2	35.5	38.7
3.18	34.7	32.4	33.8	33	37	35.2	28	25.7	15.8	18.3	31.9	29.8	23.1	23.8	21.5	22.8	19.5	5.1	36	35.3	24	19.1	23.4		18.8	14.5	25.7	37	2.5883	41.4	36.3	38.9	40.4	35.4	35.7	23	20.2	21.8	17	38.1	40.8	6.3	17.2	26.1	21.2	6.3	6.4	37.2	37.9
3.19	34.7	32.5	33.8	33.1	37.3	34.6	28	26	16.4	18	31.7	29	22.8	24.3	22.2	22.8	19.1	5.1	35.7	36	24.6	18.7	22.8		18.8	15	25.72	37.3	2.59233	43.5	35.7	36.3	36.4	36.7	34	21.9	20.2	21.8	17.9	41	40.5	6.3	14.9	26.7	20.2	6.5	6.2	37.5	37.9
3.2	34.5	32.6	34.7	33	37.1	33.5	27.8	25.7	15.8	17.5	31.7	28.5	22.8	24.5	22.1	22.2	19.1	5.1	36	35.3	24.7	19.1	22.5		18.3	15.4	25.58	37.1	2.56419	42.2	39.6	39.6	37.5	38.1	34.1	22.9	20.2	21.8	17.9	38.7	40.2	6.2	13.3	25.2	20.8	6.2	6.2	35.5	37.4
3.21	33.4	32.6	34.8	33.3	36.3	34.2	28	25.5	17.1	17.6	31.7	28	21.9	25.2	22.8	21.9	19.1	5.1	36	35.5	24.6	18.8	23.1		18.9	15.4	25.632	36.3	2.57462	43.1	37.5	40.8	37.7	37.9	32.2	22.9	20.2	20.2	17.2	38.4	37.8	6.4	13.3	26.1	21.3	6.4	6.3	36.3	37.9
3.22	33.3	31.9	34.5	33	36.8	34.2	28.5	25.4	16.3	17.5	31.7	27.8	20.6	24.6	22.8	22.8	19	4.9	35.5	34.2	24.7	19.1	23.4		18.8	15.4	25.468	36.8	2.54178	41.6	40.4	40.3	40.2	34.3	33	23.3	19.6	20.3	17.1	42	39.3	6.3	10.4	26.9	22.4	6.2	6.4	35.9	36.8
3.23	34.7	32.6	35.2	32.2	36.3	33.1	28.1	25.7	16.4	17.2	32	28	19.9	24.6	22.5	21.7	19	5	35.5	34.7	24.6	19.2	23.4		19	15	25.424	36.3	2.53301	42.9	39.1	36.8	37.9	36.3	32.4	22.8	20.2	21.4	17.2	39.6	39.6	6.3	9.4	26.2	21.8	6.2	6.4	36.8	37.5
3.24	33.3	33	34.2	33	36.9	33	28	25.1	16.8	17.2	31.7	27	19.8	24.6	22.5	22.2	19.1	5	35.8	34.9	24.6	19.2	22.8		19.6	14.6	25.356	36.9	2.51948	45.8	38.4	38.5	41	35.5	34.6	22.9	18.4	21.5	17.2	40.4	37.2	6.3	8.5	26.9	20.9	6.2	6	32.7	36.4
3.25	33.2	32.9	33	33.2	36.3	33.2	27.8	25.4	17.2	16.4	31.5	27	18.4	24.8	22.8	21.8	18.8	5.1	35.5	33.9	24.9	19.2	22.8		19.1	14.6	25.152	36.3	2.4791	45	37.2	38.4	41.3	35.7	31.6	21.8	18.5	20.3	17.2	38.1	39.6	6.3	7.6	26.6	20.9	6.2	6.2	34.4	36.9
3.26	33.3	32.2	33	32.8	36.3	32.6	28	25.1	16.4	15.8	31.6	26	17.2	24.6	22.5	22.5	18.8	4.8	35.6	34.3	24.6	19.6	22.6		18.8	15	24.96	36.3	2.44139	43.5	38.1	39.8	40.2	33	33.1	21.3	18.5	20.8	15.9	40.4	39.6	6.4	6.9	25.7	21.3	6.2	6	36.9	36.2
3.27	33.5	32.8	32.8	32	36.4	32.2	27.8	25.9	16.8	15.8	31.3	26.2	15	24.3	22.4	22.8	18.3	4.8	35.2	35	25.1	19.6	22.8		19.2	14.5	24.9	36.4	2.42967	43.7	39.6	39.8	40.2	35.1	33.7	20.2	18.6	21.3	17.2	40.2	37.3	6.2	6.5	27	20.9	6.2	6.5	36.7	37.6
3.28	33.2	33	33.4	32.6	36.3	30.7	28	25.4	17.3	15.7	31.8	25.9	12.9	24.2	22.8	22.8	17.5	4.9	35.5	35.1	25.1	19.2	23.2		19	14.6	24.804	36.3	2.41097	42.9	39.6	40.1	38.4	34.6	33	20.1	19	20.9	16.5	38.8	40.4	6.4	6.3	26.8	20.3	6.2	6.5	35.4	36.8
3.29	33.4	33.5	33.5	31.7	34.7	31.7	27.8	25.4	16.6	15.9	32	25.1	11.7	23.4	22.3	22.7	18	5.1	35.8	35.1	24.8	19.2	22.5		19.9	14.5	24.652	35.8	2.38151	42.4	37.8	39.7	39.3	35.1	33.7	20.2	18.5	21.9	16.5	38.9	39.1	6.5	6.4	26.1	19.7	6.2	6.5	36.4	34.5
3.3	33.4	33.3	32.9	32	36.6	31.1	28	25.6	17.2	15.9	32.2	24.6	11.2	24	21.8	22.8	18	5.2	36	34.2	24.6	19.7	22		19.2	14.5	24.64	36.6	2.3792	42.4	36.2	37.1	41.8	36.3	29.9	18.4	18.7	21.9	15.9	39.9	39.3	6.6	6.3	27	19.7	6.4	6.2	36.4	34.9
3.31	33.9	33.4	33.1	32.8	36	30.6	28	25.4	17.3	15.8	31.6	24	9.9	24.3	21.8	23.4	17.5	5.3	35.5	33.6	24.6	18.8	21.6		19.1	14.4	24.468	36	2.3461	40.9	41	40	40.9	32.8	29	19.4	18.7	20.7	16.6	38.9	39.6	6.9	6.2	26.2	18.5	6.1	6.2	35.7	37.5
3.32	33.8	33.7	32.9	33.1	35.8	29.7	28.7	25	16.2	15.9	31.7	24.3	8.2	23.4	21.6	23.1	17.5	5	35.7	34.7	25.1	18.7	21.8		19.1	14	24.348	35.8	2.32314	43	39.1	40.3	38.7	32	29.4	19.1	19.2	21.4	15.9	39.8	38.1	6.6	6.6	26.6	17.8	6.1	6.2	34.7	37.5
3.33	33	32.4	33	32.2	36.4	29.4	28.5	24.6	16.3	15.9	31.1	23.4	8.2	23.4	21.2	23.5	17.5	4.9	35.8	33.4	24.3	19.9	21.6		18.8	14.5	24.128	36.4	2.28135	45.8	39.6	39.6	41.6	30	32.4	18.4	20.3	21.6	15.9	40.6	37.8	6.8	6.8	26.1	17.2	6.4	6.2	34.1	36.6
3.34	33	33	32.4	30.9	36	29.5	28	25.1	16.4	15.9	31.7	22.8	7.3	23.5	21.2	23.4	17.2	5.1	35.4	34.2	24.6	19.5	21.9		18.7	14	24.028	36	2.26248	45.7	39	37.9	40.4	31.6	32.3	19.1	19.7	19.6	16.4	39.5	36.3	6.8	6.5	27	17.2	6	6.3	34.3	35.4
3.35	33.3	33.2	34.1	31.7	35.4	28.7	28.5	24.9	15.8	15.4	31.9	22.2	6.3	23.7	21.2	22.8	16.3	5	36	34.9	24.7	19.1	20.9		18.8	13.4	23.928	36	2.24368	44.6	39.7	36.4	37.5	31.9	32.7	18.5	18.4	20.9	15.8	38.8	39.6	7.1	6.4	26.7	17	6.2	6.2	35.1	36.7
3.36	33.3	33.4	33.3	33.2	35.3	27.8	28.4	23.9	16.4	15.9	31.6	19.9	4.9	23.4	20.5	22.8	16.7	5.3	35.8	35.1	24.3	19.9	21.2		19.3	13.4	23.8	35.8	2.21974	42.8	38.6	39.1	40.2	32	31.3	18.4	19.2	21.8	16	40.2	38.7	6.6	6.2	25.2	15.7	6.2	6	34.4	34.7
3.37	33.1	33	33	32.6	35.4	26.7	27.8	24.4	16.4	16.8	31.3	19.1	5.1	22.8	21.6	22.5	16.7	5.1	35.3	34.9	24.4	19.6	20.9		19.2	13.5	23.648	35.4	2.19148	41	40.7	37	41	29.4	29.4	17	17.8	20.1	16	37.3	37.9	7	6.2	24.9	17.1	6.2	6.2	32.7	35.3
3.38	33.1	33	33	32.6	34.7	26.2	28.5	24.4	15.8	15.9	31.8	19.6	4.8	22.8	20.5	22.8	16.8	5.1	35.3	34.8	24.6	19.6	21.2		18.4	12.8	23.524	35.3	2.16856	41.2	39.4	38.5	40.5	28.6	29	17.8	17.7	21.3	17	36.9	38.4	6.5	6.1	25.3	17.2	6.1	6.3	33	36.3
3.39	32.2	32.8	33.4	32.8	34.7	25.1	28.3	24.1	15.9	15.5	31.9	20.2	4.8	22.8	21.3	22.9	16.3	5	35.4	34.2	24.6	19.1	21.6		19.1	13.5	23.5	35.4	2.16414	40.9	39.7	38.7	40.5	30.6	29.4	17.8	17.8	19.7	15.9	40.8	38.7	6.4	6.1	25.7	16.3	6.3	6.2	32.7	33.7
3.4	32.1	32.4	33	32.1	34.9	24.2	27.8	24	15.8	15.5	32.2	21.1	5.1	22.2	21.8	22.2	16.4	5.1	34.7	33.5	24.2	19.1	20.5		19.1	13.5	23.3	34.9	2.12746	43.4	37.3	37.9	39.7	28.7	30.9	17.2	17.9	20.2	15.8	38.6	37.9	7.1	6.2	25.3	16.4	6.3	6.1	34.7	35
3.41	32.8	32.6	33	32.2	34.5	23.7	28.5	23.4	15.9	14.4	32.2	20.8	5	22.7	21.8	22.2	15.8	5.2	35.3	34.1	23.9	19	19.8		18.8	12.5	23.204	35.3	2.10996	44	36	39.1	40.9	25.2	29.7	17.1	17.9	20.9	16.5	38.1	37.8	6.3	6.1	25.7	17.1	6.1	6.2	33.7	35.4
3.42	33	33.3	33.3	32.8	33.7	23.1	28.6	23.6	15.9	14.1	31.6	20.2	5	22.5	21.5	22.5	15.4	5	35.2	33.5	24.1	19.2	20.2		18	12.5	23.112	35.2	2.09326	41.5	39.4	39.4	37.6	27.5	29	17.4	17	21.8	16.3	37.2	36.9	6.4	6	24.4	17	6.1	6	31.3	34.7
3.43	33.5	32.2	32.8	32.1	34.1	22.8	28.2	23	16.4	14	31.3	19.1	4.8	22.2	21.9	21.8	15.4	4.9	35.5	33.5	24.3	19.4	20.2		18.3	12	22.948	35.5	2.06366	44.8	40.9	39.1	41.4	25.3	29.3	15.9	17.1	21.4	16	37.2	36.6	6.6	6.2	24.7	17.8	6.3	6.1	33	33.3
3.44	33.2	32	32.2	32.6	33.2	21.7	28.3	23	15.9	13.5	31.1	18.3	4.8	22.3	21.5	21.8	15.9	5	35.5	32.4	23.7	19.5	19.9		18.4	12.1	22.712	35.5	2.02143	41.3	39.5	37.2	39.1	26.2	28.2	15	17.2	20.8	15.8	39.1	37.3	6.8	6.2	24.3	18	6.1	6.2	34.1	34.8
3.45	32.7	32.4	32.4	32.1	33.7	21.5	28.5	22.4	16.3	13.5	31.5	17.6	4.9	21.8	22.2	21.8	14.5	5.1	35.3	33	23.5	19.1	19.1		18.4	11.8	22.604	35.3	2.00225	44.5	37	38.7	39.8	25.3	29	14.3	17.2	20.2	15.7	37.9	35.6	6.4	6.2	23.8	18.4	6.3	6.6	32.3	35.4
3.46	33.1	31.3	33	32.7	33.4	20.3	29.1	21.6	16.3	13.4	31.1	18	4.9	21.5	21.2	21.6	14.5	5.1	34.5	32.4	24.6	19.9	18.9		18.1	11.7	22.488	34.5	1.98176	42.9	39.1	39.6	37.8	24.3	26.6	12.5	17.2	20.2	15.2	36.3	34.5	6.3	6.2	24	17.8	6.3	6.3	34	35.1
3.47	32.6	31.8	33.4	31.9	33.5	19.1	28.6	21.8	16.8	13.4	31.7	18	4.8	21.5	21.6	21.8	14.1	5.1	34.9	32.2	24.3	19.9	19.2		17.5	11.8	22.452	34.9	1.97542	45.5	39.4	40.2	42.5	23.8	27.4	10.4	17.2	20.2	15.5	37.9	33.7	6.3	6.2	24.8	17.7	6.4	6.1	33	34.5
3.48	33	33	33.2	33	32.7	18.3	29	21.8	16.8	13.4	32.2	16.7	5	21.9	21.6	21.8	13.5	5	34.7	32	23.7	19.9	19		18	11.2	22.416	34.7	1.96909	44	39.1	37.9	42.4	23.8	28.1	8.4	15	20.2	15.1	36.4	34.8	6.2	6.1	23.9	18.4	6.3	6.4	29.3	33
3.49	32.2	33	33.7	32.6	32.9	18.4	29.2	21.3	15.8	12.8	32.1	16.3	5.1	21.2	21.2	21.8	13.5	5	34.9	31.9	23.5	19.6	19.2		18	10.6	22.232	34.9	1.93689	41.8	38.4	37.2	37.9	22.9	28.2	8.2	16.5	19.6	15	38.4	35.8	7.2	6	24.3	17	6.1	7.1	32.9	34.3
3.5	33	32	33.7	32.3	33.3	17.5	28.1	21.6	16.7	13.5	31.9	17.3	5.1	20.4	20.7	21.8	12.5	4.8	34.9	32.2	23.4	18.4	18.4		17.6	11.1	22.088	34.9	1.91188	41.7	38.3	37.4	38.6	22.3	29	6.9	15.8	20.2	15	35.7	34.7	6.5	6	25.5	18.6	6.4	6.4	32.7	35
3.51	33	32.6	33.2	31.5	32.1	17.2	29.2	21.2	16.8	13.4	31.9	16.4	5	20.2	20.8	22.7	11.8	4.8	34.5	32.1	23.5	19.8	18.8		16.8	10.5	21.992	34.5	1.8953	43.5	38.4	38.7	37.8	20	27.8	6.8	17.2	19	14.2	35.2	34.8	6.8	6.2	24.3	17.1	6.1	6.5	30.9	32.7
3.52	32.6	32.5	34.3	31.5	32.2	15.8	29	21.2	16.7	12.9	31.7	16.5	4.8	20.5	19.8	23.1	12.5	4.9	34.2	32.9	23.4	19.1	18.8		17.2	9.9	21.92	34.3	1.88291	42	39.3	37.9	40.2	20.2	26.8	6.5	17.2	19.6	14.3	38.2	34.1	6.5	6.2	26.2	16.3	6.1	6.3	31.6	34.7
3.53	32.8	33	33.2	32.4	32.2	14.3	29.2	18.3	15.8	13.4	31.9	15.9	4.9	19.9	19.5	22.5	12.4	4.7	34.8	33	23.7	18.4	19.2		17.2	9.8	21.696	34.8	1.84462	44	38.1	39.1	40.1	20.2	25.5	6.6	15.9	19	15	39.3	33	6.3	6.4	24.8	16.2	6.3	6.4	30.9	31.9
3.54	32.6	33.1	33.2	32.2	31.7	14.4	29	16.7	15.8	12.9	30.9	15	5	19.5	19.4	22.2	11.7	4.8	34.9	32.2	23.4	19.1	18.8		17.2	9	21.388	34.9	1.79262	42.1	37.5	37.9	40.5	20.7	27.8	6.3	17.2	18.4	14.1	36	31.4	8.1	6.3	24.8	16.5	6.2	6.5	32.4	33.7
3.55	32.6	33.2	32.9	32.2	30.5	13.3	29.3	14.5	15.9	12.9	31.1	10.3	4.9	19	19	22.5	11.2	5.1	33.6	33.3	23.5	19.1	18.8		17.2	9.2	21.004	33.6	1.72883	42.6	38.5	38.1	39.9	19	26.9	6.4	15	18	13.4	37.6	32	7.3	6.2	23.8	15.8	6.1	7.8	32	31.9
3.56	33	32.6	33.2	31.8	31.1	12.4	30.4	7.5	15.9	13.2	31.7	8.2	4.8	19.1	19	23.1	11.1	4.9	34.2	32.8	23.5	19.1	18.4		17.2	9	20.688	34.2	1.6772	40.9	38.4	38.4	39.1	18.5	27.3	6.2	13.5	18.4	13.3	33	33	9.2	6.1	25.2	16.5	6	6.3	30.1	32
3.57	33.9	33.3	32.5	32.2	31.1	11.7	30.2	5.1	15.9	13.2	31.7	7.3	4.9	18.6	18	22.4	10.5	4.9	34.2	32.6	24.4	19	18.8		17.2	8.2	20.472	34.2	1.64236	45.8	37	39.2	39.2	17.7	25.8	7.1	13.5	18.9	13.3	36	31.4	7.8	6.2	23.8	15	6.1	6.5	30	31.9
3.58	32.8	33	32.6	31.9	30.7	11.8	30.2	4.7	15.9	13.1	31.3	6.6	4.9	18	17.6	22.5	10.5	4.9	33.6	33.1	23.7	18.7	18		17	7.3	20.176	33.6	1.59521	44.7	37.3	36.9	38.9	18.4	25.3	6.6	11.5	19	11.3	35.4	29.4	7	6.3	22.4	14.9	6.1	6.4	30.4	34.3
3.59	32	32.6	31.9	32.1	30.8	11.1	29.7	4.8	16.4	12.9	31.1	7.1	5	15.9	18	21.7	9.2	5.1	34.2	33.4	23.7	19.1	18		16.4	7.4	19.984	34.2	1.565	40.2	36.7	35.4	42	17.2	25.2	6.9	9.3	20.1	11.6	33.7	30.6	7.1	6.1	22.3	14.1	6.1	6.9	30.6	32.7
3.6	32.6	32.8	32.8	32.2	30.9	11.7	29.9	4.8	16.5	12.4	31.1	7.4	5	15.4	17.9	21.8	9.1	5.1	34.8	33.1	23.7	19.1	18		15.9	7.3	20.052	34.8	1.57567	42.3	39.6	35.8	41.1	16.7	24.3	6.5	6.6	20.2	11.6	37.3	30.2	8.1	6.2	22.9	15.1	6.4	7	32.1	33.7
3.61	33	32.8	33.4	31.3	30.3	10.4	29.7	4.8	16.1	12.9	31	7.4	4.9	13.9	18	21.8	8.1	5	34.1	33.1	24	18.8	18		16.8	7.3	19.876	34.1	1.54813	42.6	37.9	36.6	39.3	17.2	24.9	6.8	6.3	19	11.6	35.8	30.1	8.4	6.1	21.9	15.1	6	6.9	29.5	31.6
3.62	32.8	32.4	32.2	31.3	30.2	10.5	30.4	4.9	16.7	12.4	31.6	6.8	4.8	13.4	17.5	21.8	8.2	5	32.4	33.1	23.7	19.6	17.3		15.9	6.8	19.668	33.1	1.51589	42.2	37.8	37.4	40.4	17	24.4	6.6	6.5	19.7	9.2	33.5	29	8.9	6.2	23	14.2	6.2	7.3	30.9	33.1
3.63	32.8	33.3	32.8	32	29.2	10.4	30	4.8	16.5	12.4	30.7	7.3	4.9	11.7	18	21.5	7.3	4.8	33.7	32.1	24	19.2	17.5		15.9	6.5	19.572	33.7	1.50113	42.7	38.4	39	39.8	17.1	25.3	6.5	6.2	18.4	10.6	35.3	29.1	8.2	6.2	21.9	15	6.2	7.1	30	32.3
3.64	33	32.8	32.9	32.2	29.9	10.4	29.9	4.7	16.7	12.5	31.1	7.3	5	10.6	18.8	20.9	7.3	4.8	34.2	32.2	24	17.9	17.2		15.9	6.5	19.548	34.2	1.49745	42.4	39.3	38.6	40.7	15.7	26.1	7.2	6.5	20.2	9.4	34.6	27	8.5	6.4	21.8	14.2	6.1	6.3	27.1	32
3.65	33.3	32.8	32.2	32.6	30.5	10.4	30.7	4.8	16.4	13	30.4	7.1	4.9	9.8	19.2	21.2	7.3	5.1	34.1	31.7	24	18.8	16.7		15.4		20.1	34.1	1.58322	43.2	39	37.2	38.7	16	22.4	6.5	6	19.7	9.5	34.2	27.9	8.3	6.3	22.5	14.3	6.2	6.5	30.3	31.3
3.66	32.8	33	33.1	32.2	29.9	10.5	30.6	5	15.8	13.5	31.3	7.5	4.9	8.9	18.3	21.2	7.3	4.8	34.2	31.5	24.2	18.3	17.2		14.8		20.0333	34.2	1.57273	40.2	39.5	39	39.3	14.9	23.9	7.3	6.4	18.4	8.5	34	27.8	7.7	6.3	21.8	15	6.1	6.4	30.9	31.6
3.67	31.7	32.8	33.3	32.4	29.7	10.6	30	5.1	16.5	13.5	30.6	7.3	4.8	7.2	19.1	20.9	6.5	4.9	34	31.1	23.4	18.3	17.2		15.5		19.85	34	1.54408	39.1	35	35.9	37.9	14.9	23.3	7	6.3	19.2	8.1	34.7	26.2	7.8	6.3	22	14.9	6.5	6.5	28.3	31.2
3.68	31.5	33.1	32.8	32.6	29.2	10.5	30.4	4.9	16.8	13.5	29.9	7.2	5	7.1	19.2	21.2	6.6	4.9	33.9	31.7	24.3	18.8	16.8		15.4		19.8875	33.9	1.54992	41.9	40.4	37.2	39.9	14.1	22.4	7.4	6.3	18.4	7.1	32.5	25.2	8	6.2	20.9	13.4	6.5	8	28	31
3.69	30.6	33	32.9	33.1	29.5	10.6	30.7	5.3	16.3	12.9	30.7	5.7	4.8	5.7	18.7	21.8	5.8	5.1	32.6	31.2	24	18.7	16.4		15		19.6292	33.1	1.50991	42.6	37.3	37.3	40.7	15	23.4	6.8	6.4	18.5	6.6	34.7	25.2	8.2	6.3	22.1	15.1	6.2	6.5	29.8	31
3.7	32.4	33	33.3	32.4	29.2	10.6	30.7	5.1	15.9	13.5	31.1	5.1	4.9	5.4	18	21.2	6.2	4.8	33.4	31.1	24.6	18.3	17.2		14.5		19.6625	33.4	1.51505	42.6	36.9	37.1	38.1	15.1	23	6.5	6.5	19.7	7	33.3	26.1	8.1	6.2	22.4	14.2	6.3	6.8	27.5	32.9
3.71	32.1	33	32.8	33	29.5	10.5	30	5.1	16.3	13.4	30.6	5.2	4.9	5.1	17.9	21.2	5	4.9	33.5	31.1	23.8	18.4	15.9		15.5		19.5292	33.5	1.49457	40	35.7	37.2	39.3	13.3	23	6.9	6.3	19.6	6.3	33.7	24.3	8.1	6.2	23	13.4	6	6.5	29	30.6
3.72	32.1	33.4	33.3	32.2	29.3	10.5	29.9	5.1	16.4	12.9	30.4	5.8	4.8	5.1	17.1	21.2	5.1	4.9	33.6	31.3	23.9	18.8	15.9		14.6		19.4833	33.6	1.48756	41.4	36.9	37.3	37.8	14.4	22.4	7.6	6.6	19.6	6.3	34.3	22.9	8.5	6.1	22.9	13.2	6.5	6.4	29.1	31.8
3.73	33	33	33.4	32.6	29.7	11.3	31.1	4.9	15.9	13.6	30.4	6.5	4.8	5	17.2	21.6	6	5	33.8	31	23.2	19.1	15.9		14.6		19.6917	33.8	1.51955	39	34.1	34.8	40.2	13.2	22.4	6.6	7.4	18.5	6.1	32.4	21.8	8.2	6.5	22.9	13.2	6.1	6.1	29	30.5
3.74	32.2	33	33	33.4	29.7	11.1	30.9	5.1	15	12.9	30.4	6	5.4	4.8	17.2	21.8	5	5	33.7	31.1	23.6	19.1	15.8		14.6		19.575	33.7	1.50159	40.8	38.4	37.9	39.8	13.3	21.9	6.5	7.2	18.5	6.2	33.1	19.9	8.1	6.4	22.9	12.5	6.2	6.2	27.8	32.1
3.75	32.5	33.4	33.2	32.8	29.2	10.4	31.2	5.2	15.5	13.4	30.1	6.1	5.1	4.9	17.2	21.9	5.1	5.1	33.5	30.9	23.3	18.8	14.9		14.5		19.5083	33.5	1.49138	38.9	37.7	36.3	41.3	12.6	21.8	7	7.1	19.1	6.3	32.9	16	9.3	6.3	21.8	13.2	6.4	6.2	27.4	30.6
3.76	32.2	32.8	33.7	32.8	29.4	10.4	31.3	5.1	15.5	13	30.4	6.3	5	4.8	15.9	21.9	5	5	33.5	30.9	24.2	18.4	15.4		14.6		19.4792	33.7	1.48693	41	37.2	33	38.7	11.7	21.8	6.4	7.1	19.7	6.3	33	13.2	7.4	6.2	21.8	12.6	6.2	6.1	28.3	31.4
3.77	32.4	33	33.3	32.8	29.2	10.5	31.1	5.1	15	13.4	30.2	5.1	5.1	5.1	15.7	22.3	4.8	4.9	33.4	29.9	24.3	18.8	15.4		14.1		19.3708	33.4	1.47043	41.6	37.1	35	40.4	10.8	21.3	6.4	6.8	18.5	6.5	32.3	9.5	9.5	6.1	20.1	12.5	6.3	6.2	28.7	31.7
3.78	32.6	33.1	33.4	33	29.2	10.4	30.2	5.4	15.9	13.5	30.2	5.9	5.1	4.9	15.8	21.8	5.1	4.9	33.5	29.8	23.9	18.3	15		14.6		19.3958	33.5	1.47423	40.7	37.9	33.7	39.9	10.6	20.2	6.2	6.9	18.5	6.6	32.8	9.3	8.9	6.2	20.1	10.6	6.2	6.1	27	30.9
3.79	31.7	33	33.7	32.2	29.2	9.7	30.6	5	15.4	13.5	29.4	5.5	5.1	4.9	14.9	21.8	5.1	4.8	33	30.6	24	18.8	14.6		14.1		19.1917	33.7	1.44336	39.7	37.8	36.3	40	10.3	20.8	6.4	6.8	19.1	8	31.4	9.2	8.1	6.2	20.1	10.6	6.1	6.1	25.8	31.3
3.8	31.7	33	34.2	32.6	27.9	8.3	30.8	4.9	15.6	12.9	29.8	5.1	5	4.9	14.4	21.5	4.8	4.8	33	30.8	23.4	18	14.6		13.6		18.9833	34.2	1.41219	40.4	33.8	35.7	40.6	9.5	20.9	6.9	6.8	18.5	7.3	32.1	9.3	8.2	6	20	11.2	6.4	6.6	27.5	30.6
3.81	32.1	32.8	33	32	28.4	7.3	31.2	5.1	15.4	13.5	29.6	5.2	5	5.1	13.9	20.2	4.9	5	33.4	29.9	24	18	14.5		13.6		18.8792	33.4	1.39674	42.4	35.6	34.7	39.2	9.2	20.2	7.4	6.5	19	7.1	30.9	9.3	8.1	6.1	20.2	10.6	6.1	6.2	26.1	31.3
3.82	29.8	32.8	33	32.6	28.5	6.4	31.1	5	14.9	12.9	29.3	5.8	5	4.9	14.5	19.8	4.9	4.9	33	29.7	24.3	18	14		13		18.6708	33	1.36608	43.6	37.7	34.7	41.4	9.2	19.6	6.6	6.6	18.9	8	31.4	9.4	6.8	6.2	19.6	9.5	6.1	6.4	26.6	28.4
3.83	32.2	32.3	33	32.4	29	6.3	29.7	5.1	15	13.5	30	5.1	5.1	4.9	14.4	19.8	4.9	5	32.4	30.4	23.7	18.9	14		12.4		18.7292	33	1.37463	41.6	38.7	36.3	38.8	9.1	18.4	6.8	6.3	19.6	6.6	31.4	9.3	6.4	6.5	18.4	9.3	6.2	6.2	25.7	27
3.84	32	33.4	33.6	31.9	27.9	6.5	30.7	5.4	14.9	13.4	29.4	5.5	4.9	5	14.2	19.1	4.7	4.8	32.8	30.7	23.1	18	13.9		13.5		18.7208	33.6	1.37341	39.3	37.2	34.7	38.7	8.5	18.5	6.8	6.5	18.3	6.5	29.8	9.3	6.4	6.5	18.4	8.9	6.2	6	27	29.4
3.85	30.2	33	33.4	31.8	28.1	5.1	30.5	5	15.4	12.9	29.4	5.8	5.1	5	14.5	19.1	4.9	4.8	32.8	30.7	22.9	18	13.5		13		18.5375	33.4	1.34664	39.9	36.3	35	40.9	8.5	18.5	6.5	6.3	18.4	6.4	30.1	9.4	6.5	6.2	17.8	9.3	6.1	6.1	25.3	30.9
3.86	31.8	32.8	32.8	32.4	28	4.9	30.2	5.1	14.9	12.9	29.4	5.3	5.1	4.9	14.8	18.7	5	5.1	32.8	30.4	21.8	18	13.3		12.5		18.4542	32.8	1.33456	41.8	37.3	32.7	38.6	9.4	18.5	6.9	8.1	18.4	6.3	29.4	8.6	7.1	6.2	18.5	8	6.1	6.3	27	29.2
3.87	31.7	33	33.1	32.1	27.7	5.1	30.2	4.9	14.4	12.4	29.8	5.3	5.1	5	15.4	18.3	5	5	33	30	22.8	17.9	13		11.8		18.4167	33.1	1.32914	40.5	36.7	33.7	39.2	8	18.3	6.8	6.5	18.5	6.3	29.8	8.2	6.4	6.3	18.5	9.2	6.2	6.2	25.3	29
3.88	32.1	33.1	32.4	32.5	27.2	5.1	29.7	5	14.9	12.6	29.2	6.9	5	4.9	14.9	18.2	5.1	5	31.7	29.9	22.5	17.9	13		11.9		18.3625	32.5	1.32133	38.6	37.9	33.6	40.8	8.2	17.3	6.4	7.2	18.4	6.4	28.7	7.3	6.4	6.2	19.2	7.6	6	6.3	25.3	28.7
3.89	31.1	32.9	32.8	31.7	25.9	5.1	29.9	5.1	14.9	12.5	29.4	5.9	5.1	4.9	15.8	18.2	5.1	5	32.4	29.8	22.5	18.1	11.8		11.7		18.2333	32.8	1.30281	37.1	34.8	33.7	38.6	7.1	17	6.6	6.6	17.2	6.2	27.8	6.9	7	6.2	18.5	9.4	6.2	6.1	25.2	29.1
3.9	31.3	33	33.4	31.3	26.2	5	30.4	5.1	14.9	12.6	29.4	5.5	5	5	15.8	18.7	5.1	4.9	32	30.1	21.8	17.9	11.7		11.8		18.2458	33.4	1.3046	37.2	36	34.7	40.4	9.2	16.5	6.9	6.6	17.8	6.5	29.1	6.9	6.8	6.1	18.4	9.3	6.2	6.2	25.2	28.6
3.91	31.6	32.8	33.2	32.1	26.1	5.1	29.7	5.8	14.6	12.3	29.3	5.2	5.1	5.1	15.8	19	5	5	32.2	30.3	21.6	18	11.8		11.8		18.2708	33.2	1.30817	35.6	37.3	32.9	37.2	7.5	14.9	6.6	7.2	17.8	6.3	27.5	7.3	6.6	6.1	18.4	7.5	6	6.5	24.3	28.4
3.92	31.7	32.5	33.7	32	26.4	5.1	29.7	5.5	14.4	11.9	29.3	5.7	6.4	4.9	15.3	19.7	5	5	31.7	29.9	21.9	18	10		11.7		18.225	33.7	1.30162	34.7	37.5	33	37.9	7	15.8	6.2	6.6	16.4	6.6	25.8	7.4	6.4	6.2	19.1	8.2	6	6.3	22.3	29.4
3.93	32.2	33	33.4	31.8	24.5	4.9	30	5.8	14.5	11.6	29	5.3	5.3	4.8	15.9	19	5.1	5.1	31.1	30.4	21.3	17.3	8		11.8		17.9625	33.4	1.26439	32.8	37	33.3	40.9	6.6	15	7.2	7	17.1	6.4	26.6	7	6.4	6.4	19.7	8.2	6.2	6.4	23.4	30.2
3.94	32.1	32.2	33.4	30.1	24.9	4.9	30.2	5.7	15	11.7	29.2	5.8	5.2	4.9	14.9	19.8	5	5.1	32.8	30.1	21.2	17.2	7.3		11.6		17.9292	33.4	1.25971	29.8	34.8	32	41	6.9	14.1	6.3	7.1	18.4	6.4	26.6	7.8	6.9	6.3	19.7	8.4	6.2	6.2	23.7	29.8
3.95	32	32.2	33	32.4	24.9	5	29.2	5.5	14.5	10.4	29.2	5.5	5	5	14.9	19.6	4.9	4.9	32.5	29.7	19.9	17.2	7.4		11.3		17.7542	33	1.23523	21.3	35.4	32.2	39.4	8.2	13.3	6.5	6.5	16.9	6.2	26.1	6.8	6.4	6.2	19.1	7.9	6.5	6.3	23	28.6
3.96	32.2	33.1	33.3	32.1	24.4	4.9	29.3	5.6	15.5	9.8	29.2	5.5	5.1	4.9	14.6	19.8	5.1	4.9	32.6	29.9	19.8	17.2	6.5		10.7		17.75	33.3	1.23465	17.2	37.3	31.4	39.1	8.4	14.2	6.3	6.9	16.5	6.3	26.2	7.8	6.5	6.2	19.6	8.9	6.1	6.3	22.5	28.2
3.97	31.3	32.8	33.3	31.9	22.5	4.9	29.8	5.1	14.9	9.9	28.5	6.3	5	4.9	13.4	20.2	5	4.9	32.2	30.2	19.8	16.4	6.5		10.5		17.5083	33.3	1.20126	10.5	33	30.7	40.2	8	13.4	6.3	6.6	17	6.1	23.9	6.5	6.9	6	19.7	8.9	6.2	6.3	22.3	29.1
3.98	31.1	32.6	32.8	31.1	23.5	5.1	29.3	5.9	15	8.6	28.5	7.5	5	4.9	13.5	19.5	5.1	4.9	32.2	29	19.1	16.8	6.6		10.5		17.4208	32.8	1.18929	8.2	35.4	28.8	38	6.4	13.2	6.6	7.6	17.1	6.2	24.7	7.4	6.5	6.2	19.7	9.2	6.2	6.3	20.9	27.9
3.99	31.6	32.6	33.1	31.5	21.9	5.1	29.7	5.1	14.5	8.9	28.6	7.1	5	5	13.4	19.1	5.1	5	32	29.2	18.8	16.4	6.6		10.2		17.3125	33.1	1.17454	7.3	32.1	27.8	38	6.4	12.6	6.6	7.1	17.2	6	24.3	6.8	6.4	6.2	19.6	9.2	6.2	6.2	20.3	29.1
4	31.9	33.1	33.4	31.7	21.9	5	29.5	5.8	14.8	8.2	27.6	7.4	5.1	5	13.4	19	5.1	4.9	32.2	28.5	18	16.7	5.7		9.8		17.2375	33.4	1.16439	6.5	34.6	27.8	39.3	6.3	12.5	6.3	6.6	16.6	6.4	22	8.1	6.5	6.2	19.7	8.1	6.2	6.3	19.2	27.8
4.01	31.6	32.5	33.3	31.7	22.2	5	28.8	6.4	14.5	8.3	28.1	7.2	5.1	5	12.4	17.5	5	5	32.2	28.3	17.5	16.7			9.8		17.5696	33.3	1.20968	6.3	32	28.2	39.1	6.5	12.5	9	6.3	17.2	6.4	23.4	7.1	6.3	6.3	17.2	8.2	6	6.3	20.1	27
4.02	31.7	32.7	33.4	31.7	21.9	5	29.3	7.3	15	7.3	29	7.2	4.9	5.1	11.7	18	4.8	4.9	32	28.5	17.2	16.4			10.2		17.6174	33.4	1.21628	6	33.4	28	39.1	6.4	11.5	6.4	8.3	16.5	6.5	23.1	8.1	7	6.4	17.9	8	6.1	6.2	20.2	27.8
4.03	31.1	33.2	32.6	32	21.2	5.1	29.2	6.4	14.5	7.3	28.5	7.3	5	4.8	11.8	17.5	5.1	4.8	32.6	27.8	16.7	15.8			9.4		17.3783	32.6	1.18348	6.1	32	26.6	39.4	7.9	10.6	6.6	7	15.7	6.2	23.1	6.8	7.7	6.5	18.4	7.2	6.1	6.2	19.6	26.9
4.04	31.8	33	33.5	31.8	20.9	5.1	29	6.3	14.6	7	27.8	6.8	5.1	5	11.7	17.3	4.8	5.1	31.8	27.8	16.3	15.9			9.2		17.287	33.5	1.17108	6.2	29	23.4	39.7	6.4	11.6	6.6	6.9	15.8	6.4	20.1	7.5	6.9	6.4	17.7	8.5	6.1	6.2	20.2	26.7
4.05	31.2	33	32.2	32	20.5	5.1	28.8	5.5	15	5.3	27.8	7.3	5	4.9	11.7	17.2	4.9	4.9	31	28.2	14	15.9			9.7		17.0043	32.2	1.1331	6.2	22.8	22.9	40.4	7.2	10.6	7.7	7.1	15.8	6.1	20.3	7.8	6.5	6.2	17.7	9.1	6.1	6.3	19.8	27.8
4.06	32.1	32.6	33.3	31.3	20.8	5.1	29.8	5.2	15.1	5.1	28	7.4	5.1	4.8	11.8	16.3	5.1	4.9	31.2	27.8	12.9	15.5			9.1		16.9696	33.3	1.12847	6.2	18.3	22.6	39.1	6.6	10.4	6.5	7.8	15	6.2	17.8	7.3	6.4	6	17.2	8.9	6.2	6.3	19	26.7
4.07	31.2	32.6	33.1	31.3	19.8	5.1	29.4	6	14.5	5.1	28.8	7.3	5.1	4.9	12.5	16.6	4.9	5.1	31.6	28	10.5	14.5			8.9		16.8174	33.1	1.10832	6.3	12.4	22.9	39.9	7.1	10.6	6.5	6.5	14.9	6.2	15	7	6.8	6.3	17.3	8.1	6.4	6.2	19.6	25.4
4.08	30.5	33.4	33.1	31.6	19.5	5.1	28.5	5.2	15.5	5.1	28.8	6.5	4.8	4.9	11.7	16.4	5.1	4.8	31.1	27.8	8.3	14.6			8		16.5348	33.1	1.07139	6.2	7.2	22	38.4	6.4	10.5	6.9	6.6	14.9	6.3	14.9	6.9	7.4	6.3	17.1	8.1	6.3	6.3	19.7	27.9
4.09	31.1	33	32.5	32	18.3	5	28.5	5.3	14.5	5.3	28.5	6.6	4.9	5	12.4	14.9	5.1	4.9	31.2	27.5	7.3	13.9			7.6		16.3174	32.5	1.0434	6.3	6.3	20.2	39.3	6.2	9.5	6.9	6.8	15	6.1	14.9	6.4	6.5	6.2	16.5	8.4	6.3	6.3	19.1	26.6
4.1	31.5	33.6	34.2	31.8	18	4.9	28	5.1	15	5.5	27.5	7.3	5	4.9	11.9	14.5	5	4.9	31.9	28	5.6	13.5					16.7091	34.2	1.09409	6.2	6.1	18.4	37.8	6.2	9.2	6.3	7.1	14.4	6.2	15	9.2	6.8	6.2	14.9	8.2	6.2	6.2	18.4	27.2
4.11	31.1	33	33	32	17.6	5.1	29.3	5.1	15	5.2	28	7.3	5	5	11.6	14	4.8	5	31.1	27.3	6	13					16.5682	33	1.07572	6.2	6	19.6	38.1	6.4	9.3	6.8	6.9	13.3	6.1	13.6	7	7.5	6.3	14.9	8.1	6.2	6.3	18.4	26.4
4.12	31.3	32.8	33.5	31.7	17.6	5	28.2	7	15	5.4	28.5	6.7	5.1	4.8	11.7	13.4	4.9	4.9	32.2	27.5	5.1	13.1					16.6091	33.5	1.08104	6.4	6.2	18.4	36.3	6	8.1	6.4	6.8	11.5	6.2	12.6	6.8	7.2	6.2	15.7	8.3	6.2	6.2	19	26.9
4.13	31.1	32.8	33.6	32.1	15.8	5	28.5	5.4	15	5.6	27.8	7.3	5.1	4.9	11.7	14.4	4.9	4.8	32.2	27	5.3	12.3					16.4818	33.6	1.06453	6.2	6.1	19	36.7	5.9	9.2	6.6	7.6	11.5	6.3	11.6	6.4	7.2	6.4	14.9	8.1	6.2	6.2	18.4	26.4
4.14	31.1	33	33.9	31.8	16.4	5.1	28.2	5.1	14.5	5.4	27.3	7.3	5	5.1	11.7	13.5	4.8	5	31.1	27.5		11.7					16.881	33.9	1.11672	6.2	6.1	18.4	38.6	6.2	8.5	6.5	8.5	12.5	6.3	10.6	7.7	6.5	6.2	15.8	8.3	6.1	6.1	18.6	25.9
4.15	30.6	32.4	33.6	31.8	15.8	5	27.3	5.8	14.1	5.2	27.9	7.3	5.1	5.1	11.8	13.5	4.9	4.8	31.6	26.4		11.4					16.7333	33.6	1.09727	6.2	6.2	18.4	36.3	6.1	8.1	6.8	8.1	10.6	6	12.5	7.2	6.8	6.2	16.3	8.3	6.1	6.2	18.4	24.6
4.16	31.1	33	34.2	30.6	15.4	5	28.2	5.2	14.5	5.5	27.2	7.3	4.9	5	11.1	13.5	5	4.8	31.7	26.4		10.4					16.6667	34.2	1.08854	6.5	6.2	17	33.6	6.1	8.1	6.6	6.8	9.3	6.2	10.4	8.1	6.6	6.1	16.5	8.4	6.1	6.2	17.9	25.3
4.17	31.3	32.8	33.4	32.2	14.9	5	28	5.5	14	6.3	27	7.1	5	4.9	11.1	13.5	4.8	4.9	32	25.9		7.4					16.5238	33.4	1.06996	6.1	6.1	17.2	34.8	6	8.3	6.9	6.4	9.2	6	10.6	7.3	6.3	6.3	15.8	9.3	6.1	6	17.2	25.2
4.18	31.8	32.6	34.2	32.2	13.4	5.3	27.9	5.5	13.4	5.8	27.2	6.5	5	5.1	10.4	13.4	4.9	4.8	31.3	25.9		7.4					16.381	34.2	1.05154	6.1	6	17.3	36	6.2	8.5	6.6	6.6	9	6.3	9.5	6.9	7.2	6.1	15.8	9.2	6.1	6.1	18.5	25.2
4.19	31.1	32.2	32.7	31.7	12.4	4.8	27.2	5.1	13.9	5.2	26.7	7.4	5.1	5.1	10.5	13.5	5.1	4.9	32.2	25.7		7.4					16.1857	32.7	1.02663	6.3	6.3	14.9	34.7	6.2	8.3	7	6.4	6.9	6.2	9.4	8.2	7.1	6.4	15	8.9	6.3	6.1	17.8	26.7
4.2	31.1	32.4	33.4	32.4	9.8	5	27.8	4.8	13.4	5	27.2	6.5	5	5.1	9.8	12.9	4.8	4.9	31.8	25.9		6.9					15.9952	33.4	1.00261	6	6.1	15.9	32.1	6.1	7.2	6.5	7.1	7.5	6.5	7.5	8.9	6.5	6.2	15	8.1	6.3	6.3	17.2	25.8
4.21	30.7	33.1	33.3	31.7	7.3	5	27.5	5	13.9	5.2	27.7	6	5	4.8	7.3	12.9	4.9	4.8	31.6	25.9		5.5					15.6714	33.3	0.962423	6.1	6.2	15.8	29.7	6.1	7.6	6.4	6.6	7.1	6.1	6.6	8.2	7.2	6.3	14.9	8.9	6.3	6.2	17.1	26.6
4.22	31.1	33.7	33.5	31.7	6.5	5.1	27.5	4.9	13.4	5.6	26.3	6.5	5	4.8	7.4	13.4	4.8	5.1	31.3	25.2		5.2					15.619	33.5	0.956	6.2	6.1	14.2	28.4	6.3	7.7	6.2	7.1	7.1	6.3	7.2	8.7	6.9	6.4	14.2	8.3	6	6	16.4	25.6
4.23	31.1	31.5	33.8	31	5.4	5.1	26.8	5.1	13.5	5.2	26.4	6.6	5	5.1	7.3	12.4	4.9	4.9	32.2	25.9							15.96	33.8	0.998193	6.3	6.4	13.3	32.2	6.5	6.9	6.9	6.5	6.6	6.8	7.2	8.8	7.2	6.3	13.3	8.2	6.2	6.3	15.8	25.6
4.24	30.8	33	33.7	31.8	5.1	5.1	27.1	5.1	14.4	5.5	25.4	7.4	5.4	4.9	6.6	11.7	4.9	5.1	30.7	26.5							16.01	33.7	1.00446	6.1	6	13.4	29.4	6.3	6.6	7.1	7.1	6.5	6.5	7.1	8.4	6.6	6.3	13.4	9.2	6.3	6.2	16.4	24.9
4.25	30.7	32.8	32.8	31.6	4.8	5.1	27.2	5.1	13.5	5	25.9	7.3	5.1	4.9	7.2	11.1	4.9	5	31.1	26							15.855	32.8	0.985102	6.2	6	14.2	30.3	7.1	7.1	7.1	6.4	7.1	6.3	7.4	7	6.5	6.2	13.2	8.3	6.2	6.4	15	24.9
4.26	30.2	32.4	33.3	31.5	4.9	5.2	27.5	5	13.7	5.1	25.2	5.5	5.1	4.9	6.2	10.4	4.8	4.9	31.1	26							15.645	33.3	0.959179	6.3	6.3	13.3	29.6	9.4	6.9	6.4	7	8	6.4	8.1	8.3	7.1	6.1	11.2	8.8	6.1	6.2	15.1	24.3
4.27	30.6	33	33.4	32	5.1	5.1	26.8	5.1	14.2	5.4	25.4	5.7	5.1	4.9	6.3	10.4	4.9	5	31	25.7							15.755	33.4	0.972715	6.1	6.1	13.3	28.3	8.2	6.5	6.5	8	6.6	6.8	8.3	8.1	6.5	6.3	10.4	8.9	6.2	6.3	14.9	23.3
4.28	28.8	32.2	33.5	31.6	5	5.1	26.2	4.9	14.4	5.1	25.1	5.5	5.2	5	5.1	10.3	5.1	4.9	31.1	25.7							15.49	33.5	0.940268	6.2	6.2	13.3	27.1	8.1	8.1	7.4	7.7	8.1	6.5	8.4	9.4	6.5	6.2	9.2	8.2	6.1	6.2	14.9	24.4
4.29	30.4	32.7	33.3	31.6	5.1	5.1	26.5	5.1	14.1	4.9	24.2	5.4	5	5.1	5	9	4.8	4.9	31	25.7							15.445	33.3	0.934812	6.2	6.1	14.2	27	6.5	8.1	7.4	6.4	8.3	6.3	9.3	7.6	6.5	6.2	8.9	7.9	6.1	6.2	14.3	23.3
4.3	28.7	32.4	33.1	31.5	4.9	4.9	26.5	5	14.5	4.8	24	5.3	5.9	4.9	5.1	8.9	4.7	4.9	30.7	24.8							15.275	33.1	0.914347	6.3	6.2	13.2	25.3	6.5	6.5	6.6	6.5	8.2	6.4	8.3	7.2	6.5	6.1	8.2	7.3	6.2	6.2	13.3	22.9
4.31	28.5	31.7	32.8	31.6	5	5	26.2	5.1	14	5.1	24	6.2	5.2	4.8	5.4	8.2	4.7	4.7	30.6	24.8							15.18	32.8	0.903009	6.1	6.3	13.3	25.2	6.5	6.3	7.2	7.1	6.8	6.2	8.1	7.5	7	6.2	8.1	8.4	6.2	6.2	14.2	23.5
4.32	24.5	32.2	32.9	31	4.7	5.1	25.7	5.5	14.5	4.9	24.3	6	5.8	5	5.2	7.3	5	4.9	30.6	24							14.955	32.9	0.876439	6.4	6.4	14.1	23.6	6.5	6.6	6.5	6.8	7.4	7.1	8.2	7.4	6.6	6.2	8.1	7.5	6.1	6.2	14.2	22.4
4.33	28	32.2	33.1	31.1	4.9	5.1	25.1	5.1	13.3	4.9	23.4	6.7	5.5	4.9	6.2	7.2	5.1	4.9	30.1	23.7							15.025	33.1	0.884663	6.2	6	13.3	24.3	6.5	6.3	7	6.3	7.8	7	8.1	8	7	6.3	7.6	8.1	6.1	6.3	13.3	22.9
4.34	29.2	32.1	33.4	31.2	4.9	5.1	25.2	4.9	14	4.8	23.7	5.5	5.1	5	5.3	6.5	4.8	5	29.7	23.7							14.955	33.4	0.876439	6.1	6.1	13.3	22.9	6.6	6.6	8.1	7.1	7.6	7	9.3	8.1	6.8	6.1	7.2	8	6.3	6.1	13.4	23.9
4.35	26.4	32.8	33.4	32	4.9	4.9	24.8	5.1	14.5	5.1	23.2	5.5	5	5	5.5	5.8	5.1	4.9	29.7	24.7							14.915	33.4	0.871756	6.2	6.1	12.4	22.4	8	6.3	7.7	6.4	6.4	6.4	8.2	7.5	6.4	6	7	8.1	6.2	6.3	13.3	22.9
4.36	25.9	31.9	31.2	32	4.8	5.1	24.6	4.9	14.6	4.8	22.8	5.1	5.2	4.9	5.4	5.4	5.1	4.7	29.7	24.6							14.635	32	0.839333	6.2	6.3	11.4	20.2	7.1	6.4	6.3	6.6	6.6	7.2	9.3	6.5	6.2	6.1	6.5	8.1	6.1	6.2	11.4	20.9
4.37	24.3	31.7	33	31.7	5.1	4.9	24.2	5.1	13.9	5	22.8	5.3	5.1	4.9	5.2	5.2	5	4.9	29.4	23.4							14.505	33	0.824488	6.2	6.2	12.5	21.3	6.5	6.5	7.2	6.6	7.2	8.6	9.2	8.3	6.4	6.2	6.5	8.4	6.4	6.3	10.5	22.9
4.38	23.9	31.8	33.8	31.3	4.8	5.1	24.3	5.1	14.6	5	22.6	5.4	6.3	5.1	5.6	5.1	5	4.8	28.5	24							14.605	33.8	0.835895	6.3	6	13.1	21.9	6.4	6.5	7.1	7	7.1	8.1	8.4	8.2	7.3	6.1	7.3	8.1	6.2	6.2	9.2	22.9
4.39	21.4	31.8	33.7	30.7	4.8	5.1	24.6	5.1	14	5.1	21.8	5.5	5.1	4.9	5.3	5.3	4.9	4.8	29.2	24.6							14.385	33.7	0.810902	6.2	5.9	12.5	19.8	6.4	6.3	8.3	6.2	6.4	6.6	9.3	8.1	6.4	6.2	9.3	8.9	6.2	6.1	8.2	22.8
4.4	21.4	31.7	33.9	30.6	4.8	5.1	24.7	5	13.9	5	21.8	6.5	5.1	5	5.8	5.3	4.8	4.9	29.7	23.7							14.435	33.9	0.816549	6.4	6.2	12.9	19.1	6.3	6.5	7.6	7	7.1	8.1	8.2	7.7	7.8	6.4	9.1	8.2	6.1	6.4	9.1	22.3
4.41	19.1	31.7	33.4	31.8	5	4.9	24.2	5.1	14	5.1	22.2	6.6	5.1	4.9	5.4	5.3	4.9	4.9	30.5	23.4							14.375	33.4	0.809775	6.2	6.3	12.9	18.5	6.4	6.4	8.1	7.2	6.5	8.4	9.3	8.6	6.9	6	7.2	9.2	6.2	6.2	9.2	21.3
4.42	18	32	33.1	30.9	4.9	5	24.6	5.1	13.5	5.2	21.2	5.8	4.9	4.9	6.4	5.1	4.9	5.1	30	23.4							14.2	33.1	0.790179	6.2	7.3	12.6	19	6.4	6.6	8.1	6.6	6.4	6.9	8.8	8.3	6.3	6.1	8.4	9	6.1	6.2	9.2	22.2
4.43	16.8	32.1	33	29.4	4.8	5.1	24.2	5.1	13.5	5.1	21.2	5.3	5.1	5.1	6.4	5.8	5	4.7	29.3	22.5							13.975	33	0.765336	6.2	6.5	12.5	18.5	6.3	6.4	8.2	6.5	6.4	7.7	8.5	8.2	7.1	6.1	8.3	8.1	6.2	6.2	9.1	21.2
4.44	14.7	32.2	33.1	31.1	4.8	5.1	24	5.1	13.5	5.1	21.2	5.4	4.9	5.1	7	4.9	5	4.9	29	22.8							13.945	33.1	0.762054	6.3	6.3	12.1	18.5	6.3	6.8	7	7	6.5	7.7	8.8	6.5	7.2	6.3	9.2	8.1	6.5	6.3	9.2	22.3
4.45	13.4	31.7	32.1	30.9	5.1	5	22.8	5.1	13.5	5	21.8	6.1	5.8	5.1	5.9	5	5.1	4.8	29	22.8							13.8	32.1	0.746289	6.1	6.8	11.4	17.2	6.4	6.3	7.1	6.6	7	8.1	8.1	7.9	7.2	6.2	9.1	8.1	6.2	6.3	9.2	22.3
4.46	11.8	31.8	33	31.1	4.8	5	22.8	5.1	13.5	4.9	21.2	5.7	5.1	5	5.8	5.2	5.1	4.9	28.2	21.8							13.59	33	0.723748	6.4	6.8	12.5	16	6.4	7.3	6.6	6.9	6.4	6.8	8.8	7.1	6.4	6.3	9.2	8.8	6.1	6.6	9.3	21.8
4.47	9.7	31.7	32.8	31.2	4.8	5.1	23.3	4.8	13.5	4.9	21.2	6	5.1	4.9	5.7	5.1	5.1	4.9	27.8	21.8							13.47	32.8	0.711023	6.3	7.9	11.6	16.4	6.8	6.3	8	7.3	6.2	7.1	8.8	6.6	6.4	6.4	9.2	9.2	6.5	6.4	9.1	21.9
4.48	7.7	32.1	33.5	30.4	4.8	4.9	22.8	5.8	13.5	4.9	20.9	5.7	5.1	5.1	6.2	5	5.1	4.9	28.3	22.1							13.44	33.5	0.70786	6.2	6.8	11.5	15.9	6.5	6.5	7.9	6.8	6.3	8.2	8.1	6.6	7.2	6.4	9.2	9.5	6.1	6.4	9.2	22.1
4.49	7.2	32.2	33.3	30.4	4.8	4.9	22.9	5.4	13.4	4.8	20.2	6.6	5.1	5	5.7	5.7	5.1	4.8	27.3	21.8							13.33	33.3	0.69632	6.1	6.3	10.2	15.7	7.1	6.2	6.6	7.3	6.5	7.2	9	7.2	6.5	6.3	9.1	8.2	6.3	6.2	8.4	21.9
4.5	5.8	32.6	33.7	30.7	4.8	5.1	22.6	5.5	13.5	4.8	21.1	6.5	5.1	4.8	6.4	6.6	5	4.8	28.3	21.8							13.475	33.7	0.711551	6.1	7.3	10.7	14.9	7.2	6.5	7.2	8.1	6.4	7.2	8.3	8.2	6.3	6.1	9.3	8.3	6.2	6.2	8.1	20.1
4.51	5.5	32.1	33	31.3	4.9	5.1	22.3	5.4	13.5	4.9	20.4	5.8	5	4.9	5.8	5.5	5.1	4.9	27.8	21.1							13.215	33	0.684357	6.3	6.5	10.8	15.8	6.6	6.3	7.2	6.4	6.5	7.6	8.6	8.3	6.3	6	9.2	8.2	6.2	6.3	8.6	20.5
4.52	5.8	31.7	33	29.5	4.8	5	22.3	6	13.5	5.1	20.3	6.3	5	4.9	6.6	5.4	5.1	4.8	26.7	21.2							13.15	33	0.677642	6.1	6.3	10.6	15.7	6.3	6.5	7.7	6.6	6.4	7.7	8.2	8.1	6.3	6.2	8.3	8.3	6.3	6.3	7.9	20.1
4.53	5.5	31.8	33.4	29.9	5	5.3	22.9	5.5	12.9	5.1	19.9	5.5	4.9	4.9	6.2	5.1	5.1	4.9	27	20.4							13.06	33.4	0.668398	6.3	6.4	12.5	14.8	7	6.3	7.1	6.8	6.1	7.3	8.1	7.1	6.3	6.2	9.2	8.1	6.3	6.2	7.9	19.6
4.54	5.3	32	33.7	29.7	5.2	5.2	22.1	5.7	13.4	5.2	19.1	5.1	5.2	4.9	5.6	5.1	5.1	4.8	27.2	21							13.03	33.7	0.665331	6.4	6.4	11.5	14.9	6.5	6.5	7.3	7	6.2	6.9	9	7.1	6.3	6.1	9.3	8.3	6.4	6.3	7.2	19.7
4.55	5.4	31.8	33.4	30.4	5.1	5	22.9	6.1	13.4	5.1	19.2	5.1	5.5	4.9	5.2	5.2	4.9	4.9	26.2	20.1							12.99	33.4	0.661252	6.2	6.3	11.3	15	6.5	7.1	7.1	8.1	6.2	6.5	6.6	7.8	6.5	6.1	9.4	7.7	6.2	6.4	6.9	18.9
4.56	5.8	31.7	33.4	29.9	5.1	4.9	21.8	5.3	12.9	5.1	19.2	5	5	4.9	5.2	5	5	4.9	25.6	20.5							12.81	33.4	0.643053	6.2	6.2	11.4	15	6.2	6.6	7.2	8.4	6.4	6.3	6.5	7.8	6.6	6.1	9.4	8.1	6.1	6.3	6.4	20.4
4.57	5.5	32.1	33.5	29.9	5.1	5.2	22.3	6.5	13.4	5.6	19.1	5.4	5.1	5	5	4.9	4.9	4.8	25.9	20.5							12.985	33.5	0.660743	6.2	6.2	9.5	13.3	6.2	6.3	7	7.2	6.4	6.6	7.1	8.3	6.6	6.1	8.5	8.1	6.3	6.3	6.5	19.8
4.58	5.8	30.8	32.8	29.7	5.1	5.1	22.5	6.5	13.5	5.5	19.1	5.1	5.7	5.1	5.1	5.1	5.1	4.7	25.7	20.2							12.91	32.8	0.653132	6.2	6.4	9.4	13.2	6.2	6.5	8.2	7	6.6	6.6	7.1	7.8	7.2	6.4	8.2	9.2	6.2	6.3	6	20.4
4.59	5.1	32.6	33	30.2	5.3	5.2	22.2	5.5	13.5	7.3	17.9	5.1	5.1	4.9	5.1	5.1	5.1	4.7	26.2	20.6							12.985	33	0.660743	6.5	6.4	9.2	13.3	6.4	6.3	8.4	7.7	6.8	6.3	7.4	6.6	7	6.4	8.2	6.8	6.3	6.9		19.7
4.6	5.1	31.9	32.8	30.9	5.8	5	21.9	5.5	13.4	7	18	5.1	5.1	4.9	6	5.5	4.9	4.9	25.4	20.5							12.98	32.8	0.660234	6.2	6.2	10.5	13.3	6.4	6.5	9.2	7.3	7.5	6.6	7	7.1	6.4	6.5	9.2	6.9	6.4	6.5		18.2
4.61	6.3	32.2	32.9	29.9	5.1	5.1	22.5	5.6	13.4	6.3	17.1	5.1	5.6	4.9	5.1	5.5	5.1	4.7	25.1	21.2							12.935	32.9	0.655664	6.2	6.3	10.6	12.6	7.2	6.2	8.5	8.4	7.1	6.8	7	7.3	6.3	6.5	8.4	7.6	6.2	6.2		18.4
4.62	5.1	32.1	33.4	30.2	5.2	5.5	21.2	6.4	13.4	7	18	5.1	5	5	6	5.2	5.2	4.9	25.1	20.9							12.995	33.4	0.661761	6.2	6.1	11.5	12.5	6.4	6.4	8.7	8.5	7.8	6.9	7.3	7.4	6.5	6.3	8.1	8	6.2	6.2		20.1
4.63	5.3	32.1	33.5	29.7	5.6	5.7	21.2	5.5	13	7.3	17.2	5.1	5.3	4.9	6.3	5.8	5.1	5.1	25.4	20.8							12.995	33.5	0.661761	6.3	6.2	13.5	12.5	6.4	6.9	9.2	7.7	7.8	7.4	8.3	8.2	6.4	6.4	9.1	7.5	6.3	6.4		20.8
4.64	5	31.7	33.4	29.5	5.1	5.1	21.2	5.6	12.6	7.1	18	5	5.1	4.9	6	6.5	4.8	5	25.7	21							12.915	33.4	0.653638	6.1	6.3	13.3	12.9	6.4	6.5	9.2	8	8	6.5	7.1	7.1	6.9	6.5	9.2	6.9	6.4	6.4		19.7
4.65	5	31.2	32.1	29.5	5	5	20.9	5.1	12.9	6.4	17.2	5.1	5.2	4.9	6.3	5.1	4.7	5.1	24.9	20.5							12.605	32.1	0.622636	6.2	6.4	14.1	13.4	6.8	6.4	8.1	7.1	7.8	7.7	8.9	8.4	7.1	6.4	9.2	7.3	6.3	6.4		19.6
4.66	4.9	32	33.2	29.9	5	5.2	21.2	6.6	12.9	6.6	17.6	5.5	4.9	4.9	6.1	4.9	4.8	4.9	25.4	19.5							12.8	33.2	0.64205	6.4	6.3	15.8	13.3	6.5	6.4	8.4	7.2	6.9	6.8	8.1	9	6.4	6.4	8.1	6.8	6.4	6.4		19
4.67	4.7	31.7	33.4	28.7	5.1	5.2	20.6	5.8	12.6	7.3	16.4	5.1	5.1	5.1	6	5.1	4.7	5.1	25.1	19.9							12.635	33.4	0.625603	6.2	6.1	14.9	13.3	6.4	6.8	8.5	8.1	8.9	6.8	7.2	7.2	7.9	6.4	6.5	8	6.5	6.3		17.7
4.68	5	31.3	32.9	29.4	5.2	5.1	19.8	5.1	12.9	6.9	16.4	5.3	5.8	4.9	5.2	5.1	5	4.9	25.2	19.1							12.525	32.9	0.614758	6	6.4	14.2	12.6	6.6	6.6	8.3	7.7	8.2	7.3	7	7.6	6.5	6.2	7.3	6.6	6.3	6.3		18.5
4.69	4.8	31.5	33.6	28.8	5.1	5.1	19.6	5.2	13	7.3	15.9	5.1	5.3	5.1	5.3	5.1	4.9	5	25.4	18.3							12.47	33.6	0.609371	6.4	6.5	13.3	13.2	6.4	6.3	8.1	8.3	8.1	6.6	7.8	7.6	6.3	6.9	6.4	6.9	6.4	6.4		18.4
4.7	4.8	31.7	33.3	28.9	5	5.1	19.8	5.2	13.5	7.4	15.9	4.9	5.9	5	5.1	5	4.9	5.1	24.8	18							12.465	33.3	0.608882	6.2	6.4	14.9	13.1	6.5	7.7	8.6	9.4	8	7.5	6.8	7.3	6.4	6.5	6.5	7.4	6.5	6.4		17.2
4.71	4.8	31.5	33.5	27.9	4.9	5.1	20.5	6	12.5	7.1	15.9	5.2	5	5.1	5.5	5.2	5	4.9	25.1	17.6							12.415	33.5	0.604007	6.1	6.4	14.2	12.3	6.5	6.4	9.7	7.2	7.5	7	6.6	7.3	6.9	7.2	6.5	8	6.5	6.1		17.2
4.72	4.9	31.1	33.5	28.3	4.9	5	19.9	5.2	11.8	7.3	16.3	5.1	4.9	4.9	5.8	5.1	5.1	4.9	24.8	17.2							12.3	33.5	0.592869	6.2	6.5	12.6	9.2	7	6.4	8.2	7	8.1	6.9	6.9	6.8	6.5	6.8	6.2	7.3	6.3	6.3		17.2
4.73	5	31.6	33.4	27.9	5.1	5.1	19.9	5.3	12.5	7.3	15.8	5.2	5	5	5.8	5.3	4.9	4.9	24.5	17.2							12.335	33.4	0.596248	6.3	6.2	12.5	10.2	6.6	6.9	9.2	7.1	7.7	7.6	6.9	6.8	6.4	6.4	6.4	8.1	6.1	6.4		17.2
4.74	5	30.8	34.2	28.5	5.1	5.8	19.8	5.8	11.7	5.9	15.8	5	4.9	4.9	5.1	5.2	4.8	4.9	23.7	17.2							12.205	34.2	0.583746	6.4	6.1	13.2	12.5	6.5	6.6	8.3	8.1	7.1	7.5	8	8.1	6.6	6.5	7.2	7.2	6.1	6.2		17.2
4.75	5	30.4	33	27.8	5.1	5.1	19.1	5.6	12.9	7.3	14.9	5.2	5	5	5.6	5.2	4.8	4.9	23.4	17.3							12.13	33	0.576594	6	6.4	13.3	11.6	6.4	6.5	8.4	6.6	8	6.9	6.9	7.2	6.5	6.6	6.4	7	6.1	6.1		15.8
4.76	5	31.1	33.4	27	5.1	5.1	19.1	5.3	12.5	7.2	15	5	5	4.9	6.4	5.2	4.8	4.9	23.4	16.7							12.105	33.4	0.57422	6.2	6.1	12.5	12.5	6.3	6.5	9.2	7.1	6.8	6.6	6.8	7.1	6.4	7	6.5	7.3	6.2	6.3		15.8
4.77	5.1	29.3	33.4	26.5	4.9	5	19.5	5.1	12.4	7.4	15.8	5.1	5	5	5.6	5.3	4.8	4.9	23	16.4							11.975	33.4	0.561953	6.2	6.2	13.3	12.5	6.3	6.5	8.3	7.9	6.9	8.2	7.1	7.6	7.1	6.4	6.3	7.1	6.4	6.4		16
4.78	5.1	29.5	33.3	25.1	5.1	5.1	18.7	4.9	11.7	6.4	15.9	5.2	5.2	4.9	5.8	5.1	4.9	4.9	22.8	16.4							11.8	33.3	0.545648	6.1	6.2	13.3	13.4	6.3	7.8	8.2	7.1	8.2	6.5	7	7.1	6.4	6.3	6.4	7	6.2	6.1		16.4
4.79	5.2	28	32.8	24.3	5.1	5.5	17.9	5.1	11.8	6.3	15.8	5.3	5.1	4.9	5.1	5.3	4.8	4.9	21.8	16.7							11.585	32.8	0.525945	6.3	6.2	11.6	12.6	6.3	7.1	8.6	8.1	8	8.1	6.6	6.6	6.6	6.1	6.5	6.8	6.2	6.2		16.4
4.8	5	27.3	32.6	23.4	5	5.2	17.5	5	11.1	7.1	15.4	5.2	5.2	5	5.1	5.1	4.7	5.1	21.1	16.8							11.395	32.6	0.508835	6.2	6.1	12.5	13.4	6.4	6.5	9.1	7.8	7.4	8	7	7.5	6.3	6.1	7.5	6.6	6.3	6.3		15.1
4.81	5	25.9	31.2	23.4	4.9	5.1	17.9	5.1	11.8	6.5	15.5	5.1	5.1	5	5.1	5.4	4.8	5	21.8	17.2							11.34	31.2	0.503935	6.2	6.2	13.1	13.4	6.8	6.1	8.8	7.1	8.1	6.5	8.2	8.9	6.4	6	6.9	6.5	6.3	6.1		16.5
4.82	5	25.4	31.1	23.1	5.1	6.3	17.2	4.9	10.6	7.1	15.4	5.2	4.9	5	5.6	5.7	5	4.9	21.6	16.7							11.29	31.1	0.499501	6.1	6.2	12.5	10.5	7.1	6.5	8.2	7.2	7.9	7.8	6.6	8.3	6.4	6.2	6.4	6.9	6.3	6.3		15.9
4.83	4.9	23.7	31.6	22.5	5.1	5.1	16.7	5.1	10.6	6.5	14.5	5.5	5.2	4.8	5.5	5.6	4.8	5	21.2	17.5							11.07	31.6	0.480224	6.1	6.3	12.6	11.5	8.4	6.5	7.7	7.8	7.1	7.8	6.4	9.2	6.3	6.2	6.5	6.6	6.2	6.2		15
4.84	4.9	23.1	31.8	22.2	5.1	5.1	16.8	5	11.2	6.8	15.5	6	5.1	4.9	5.5	5.7	4.9	4.8	21	17.1							11.125	31.8	0.485008	6.2	6.2	11.8	9.4	7.1	6.5	8.1	6.8	7.2	8.4	6.3	7.7	6.4	6.1	6.4	6.6	6.4	6.2		14.8
4.85	4.9	19.8	31.1	21.2	5	5.1	16.4	5.3	10.6	6.5	15	5.8	4.9	5	5.4	5.1	4.9	4.8	19.8	17.2							10.69	31.1	0.447821	6.5	6.3	12.3	11.6	7.3	6.1	8.3	7.9	6.5	7.9	6.4	9.1	6.5	6.2	6.6	6.6	6.2	6.1		14.8
4.86	4.8	13.4	31.1	21	5.3	5	16.2	5.1	9.8	7.5	15	6	5.3	4.9	5.9	5.5	4.6	5	20.6	17.2							10.46	31.1	0.428758	6.1	6.4	11.5	10.4	7.4	6.6	6.9	7.5	7.1	6.6	6.5	6.9	6.8	6.4	6.4	7.1	6.2	6.2		13.4
4.87	5	8.2	32.2	20.5	5.3	5	15.9	5	9.8	6.5	14.5	5.5	5.3	5	5.5	5.7	4.8	4.9	21	17.2							10.14	32.2	0.402925	6	6.2	11.5	11.4	7.1	6.3	7.3	6.9	7.1	6.4	6.5	7.5	7.1	6.4	6.5	6.5	6.3	6.4		14.4
4.88	5	5.6	31.5	19.8	5	5	16.7	5.1	8.3	5.5	14.6	6.2	5.1	4.9	5.2	5.2	5.1	4.9	20.2	17.2							9.805	31.5	0.376742	6.2	6.3	12.5	11.4	8.5	6.5	7.1	7.3	7.1	6.3	6.3	7.8	6.3	6.1	6.4	6.9	6.3	6.3		14.1
4.89	4.9	4.8	31.7	19.8	5.1	5.1	15.9	5.1	8.9	5.9	14	6	5	4.8	5.2	5.1	4.8	5	19.7	15.8							9.63	31.7	0.363414	6.1	6.3	11.5	10.6	7.2	6.4	6.8	6.6	7.1	7.5	6.4	6.8	6.3	6.1	6.5	6.6	6.3	6.6		13.2
4.9	4.9	4.9	30.6	18.7	5.1	5	15.9	5	8.2	6.4	14.1	5.5	4.9	4.9	5.2	5.1	4.8	5	20.4	15.8							9.52	30.6	0.355159	6.1	6.1	11.6	11.6	6.6	6.6	6.6	8	7.1	7.1	6.5	7.3	6.8	6.2	6.8	6.4	6.2	6.3		13.2
4.91	4.9	5	31.1	17.2	5.1	5.1	14.9	5.4	7.4	5.5	14	5.2	5.2	4.9	5.7	5.1	4.8	4.9	21	15.5							9.395	31.1	0.345893	6.2	6.1	11.3	10.5	7.6	6.5	8.1	6.3	6.8	6.8	6.4	6.9	6.4	6	7.1	6.4	6.3	6.2		12.4
4.92	4.9	5	31.5	17.1	5.1	5.1	15.5	5.1	7.4	7	13.6	6.3	5	4.9	5.8	4.8	4.9	4.7	19.8	14.4							9.395	31.5	0.345893	6.2	6.2	9.8	10.4	7.4	6.9	7.2	6.6	7	7.5	6.4	7.7	6.4	6.1	6.3	7.4	6.1	6.2		13.2
4.93	4.9	4.9	31.5	15.8	5	5.4	14.4	5.1	7.2	5.1	13.5	5.2	5.7	5	6.4	5.1	4.8	5	19.1	14.5							9.18	31.5	0.330243	6	6.3	10.1	9.2	8.3	6.2	7	6.9	8.8	7.3	6.5	8.2	6.5	6.2	6.3	6.6	6.2	6.3		11.4
4.94	5	5.1	31.3	15.9	5.1	5.1	14.5	5	7.3	6	12.9	5.1	5.3	5.1	6	4.8	4.7	5	19.1	14							9.115	31.3	0.325583	6.3	6.2	10.3	9.2	8.1	6.6	7.6	7.6	8.3	7.3	6.5	8.1	6.5	6.1	6.1	6.8	6.2	6.4		10.4
4.95	5.1	4.9	30.6	13.3	5.1	4.9	14.4	5.1	7.5	5.7	13.7	5.8	5.7	5.1	5	5	5	4.7	18.3	14.5							8.97	30.6	0.315307	6.3	6.2	9.3	9.3	7.3	6.6	7.8	8	8.4	7.4	7	7.9	6.8	6.3	7.8	8.1	6	6.1		9.2
4.96	4.9	4.9	31.6	11.8	5.1	5.1	14.5	4.9	7.3	6.8	13.5	5.8	5.1	5.1	5.3	4.9	4.7	4.9	18.1	13.9							8.91	31.6	0.311103	6.6	6.2	9.4	9.4	7.1	6.6	7.6	7.5	8	7.1	6.6	8.1	6.3	6.3	9.2	7.6	6.3	6.2		9.3
4.97	5	5.1	31.7	11.7	5.2	5.1	13.5	5.1	7.3	5.9	13.3	6	5.3	4.8	5.1	5	4.8	5	18.1	13.4							8.82	31.7	0.30485	6.1	6.1	8.5	9.1	8.4	6.4	7.1	7.1	8.2	7.9	6.5	7	6.3	6.1	9.2	7	6.3	6.3		9.4
4.98	4.9	5	31.5	8.2	5.8	5.2	13.4	5.1	7.3	6.3	13.4	5.8	5.4	4.9	6	4.8	4.9	4.7	17.3	13.5							8.67	31.5	0.294569	6.4	6.4	9.3	9.2	7.5	7.1	6.8	8.1	8.2	6.6	6.9	8.1	6.3	6.1	8.6	7	6.3	6.1		9.3
4.99	4.8	5	30.9	9	5.6	5.1	13.5	5.1	7.9	5.1	13.5	6	5	5	5.3	4.8	4.8	4.8	16.4	14							8.58	30.9	0.288485	6.3	6.4	9.3	9.2	8.3	6.3	7.8	6.9	8.9	6.9	6.4	8.6	6.5	6.2	9.2	6.8	6.2	6.3		9.2
5	5.1	4.9	31.5	7.3	6	5.5	13.5	5.1	7.4	5.5	14.1	5.5	5	5	5.7	4.8	4.8	4.8	15.8	14.6							8.595	31.5	0.289495	6.5	6.4	9.2	9.2	7.4	6.5	7.2	7.3	7.9	7.7	6.5	8.3	6.8	6.2	8.1	7.1	6.3	6.4		9.3
5.01	5.1	5	31.7	7.4	5.3	5.3	13.4	5.4	7.2	6	13.9	5.2	5.5	5	6.2	4.9	4.8	4.8	15.9	13.8							8.59	31.7	0.289158	6.3	6.2	9.2	9.4	8.2	6.2	7.9	6.3	7.5	7.2	6.5	8.1	7	6.3	9.2	6.5	6.4	6.1		9.2
5.02	4.9	4.8	31.1	7.3	6.3	5.1	13.6	4.9	6.2	5.5	13.9	5.8	5.1	4.9	5.8	4.8	5	4.8	15	13.4							8.41	31.1	0.277166	6.8	6.3	9.2	9.3	6.9	6.4	8.2	7	7.4	7.3	6.4	8	7.2	6.3	9.3	6.8	6.2	6.5		9.3
5.03	4.8	5	31.7	6.4	6.3	5.3	13.5	5.1	6.3	5	13.5	5.2	5.1	4.9	5.8	4.9	5	4.8	15.9	14							8.425	31.7	0.278156	6.6	6.4	9.3	9.2	7.1	6.2	8.3	6.5	7.1	8	6.4	7	6.8	6.2	9.4	7.1	6.3	6.2		9.8
5.04	5	4.9	31.8	6.3	5.5	5.2	12.5	5.8	5.7	6	13.5	5.2	5.1	4.9	6	4.8	4.8	4.9	14.9	13.4							8.31	31.8	0.270614	6.4	6.4	10.5	9.2	9	6.4	7.1	7	8.1	8.7	6.5	8.3	6.8	6.4	9.4	6.5	6.3	6.4		10.4
5.05	5	4.8	30.5	7.3	6.4	5.1	11.8	5.6	5.3	5.5	12.9	5.8	5.2	5.1	5.8	4.9	5	4.8	14.4	14							8.26	30.5	0.267368	6.3	6.5	9.2	9.3	9.1	6.6	8	7.5	8.3	6.4	6.5	9.2	6.6	6.2	9.3	7.6	6.3	6.3		10.4
5.06	4.9	4.9	31.4	6.4	6.4	5	11.7	6.5	5.1	5.7	13.5	5.1	5.1	4.9	5.5	4.8	5.1	5	15	13.4							8.27	31.4	0.268015	6.3	6.2	9.2	9.3	7.9	7	7.3	8.1	7.9	7.3	6.5	8.2	6.5	6.2	9.1	6.8	6.1	6.2		9.2
5.07	5.1	4.9	31.1	5.8	5.9	5	11.2	5.5	5.1	6.6	12.5	5.5	5.5	4.8	6.1	4.8	5.1	5	15	13.5							8.2	31.1	0.263497	6.2	6.2	9.3	9.4	8.2	6.9	8.2	7.1	7.3	7.2	6.4	8.7	6.4	6.2	9.3	8.1	6.2	6.4		9.2
5.08	5.1	4.8	29.7	7.2	5.4	5.1	11.8	6.5	5	5.7	12.9	5.6	5	5	6.2	4.8	5.1	4.8	15.9	14							8.28	29.7	0.268664	6.4	6.2	9.2	9.2	8.4	6.4	7	7.5	7.4	6.6	6.3	8.3	6.4	6.3	9.3	7.4	6.3	6.1		8.6
5.09	4.7	4.9	30.3	7.2	6.1	4.9	11.2	5.5	5.3	6	13.4	5.5	4.8	5	5.4	4.9	5	4.9	15.8	13.5							8.215	30.3	0.264462	6.3	6.2	8.4	9.1	8.3	6.2	7.7	8.2	7.4	6.3	6.5	7.1	6.4	7.1	9.3	6.6	6.2	6.2		7.9
5.1	5	4.8	30.6	8.2	6.1	5.1	10.4	5.4	5.1	5.3	12.9	5	5	5	5.5	4.8	5.1	4.7	15.8	14							8.19	30.6	0.262855	6.4	6.2	8.1	7.8	7.9	7.7	7.5	7.6	8.1	6.6	6.6	8.2	7.2	6.3	9.3	7	6.1	6.3		6.9
5.11	4.8	5.1	31.6	8.1	6.6	4.9	10.4	6	5.1	5.4	12.4	5.5	4.8	4.9	7.1	5	5.1	4.9	15.8	13.9							8.37	31.6	0.274536	6.8	6.1	8.2	9.2	6.8	6.9	8.3	6.9	8.1	7.5	8.4	8.4	6.5	6.4	9.2	7	6.3	6.2		6.9
5.12	4.9	4.6	31.1	9.1	5.5	5.2	10.5	5.2	5	5.5	12.4	5.6	4.9	4.8	5.1	4.9	5.1	5.1	15.8	14							8.215	31.1	0.264462	6.2	6.2	9	8.9	6.9	7.4	6.6	7.7	6.6	9.2	9.5	7.3	6.4	6.9	8.4	6.4	6.2	6.2		7.1
5.13	5	4.7	30.8	9.9	6.5	5.2	10.5	5.2	5	6.3	12.4	5.3	4.8	4.8	5.9	4.9	5.2	4.9	15.9	13.5							8.335	30.8	0.272245	6.2	6.3	9.2	8.7	6.5	6.4	6.5	9	8.2	7	8.9	8.2	6.3	7.5	9	6.4	6	6.2		7
5.14	5.1	4.8	30.8	10.5	5.7	5.3	9.9	5.9	5.1	5.1	12.4	5.6	4.9	5	5.5	5	5.3	5	15.4	13.9							8.31	30.8	0.270614	6.3	6.4	9.3	9.4	6.2	6.4	7.6	9.1	7	6.6	8.7	8.3	6.3	6.5	9.5	6.6	6.2	6.2		7.8
5.15	5	4.9	30.4	11.2	5.9	5	8.2	6.5	4.9	5.3	11.8	5.7	4.8	5.1	6.1	5	5.5	5	14.9	13.5							8.235	30.4	0.265752	6.3	6	8.9	9.2	6.8	6.2	6.6	8.3	6.8	6.8	8.7	7.1	6.4	7	9.3	9.4	6.2	6.4		6.9
5.16	4.9	4.9	31	11.7	6.3	5.3	8.2	5.3	5.1	5.1	12.4	6.3	4.9	4.9	6.5	5	5.1	4.8	14.8	13.4							8.295	31	0.269638	6.3	6.2	9.2	9.3	6.5	7	6.8	9.2	6.8	6.6	8.4	7.2	6.5	6.8	9.6	9.4	6.1	6.2		6.8
5.17	4.9	4.9	30.8	11.7	5.5	5.1	9	5.7	4.9	5.8	11.7	5.4	5	4.9	6.6	5.1	5	4.8	15.4	13.6							8.29	30.8	0.269313	6.3	6.2	9.2	9.4	6.8	6.1	8.3	8.2	7.2	7	8.2	8.1	6.4	6.4	9.2	9.1	6.3	6.3		7.7
5.18	4.8	4.8	31.1	11.7	5.8	5.1	8.2	5.5	5.4	5.2	11.7	6.5	4.8	4.9	5.8	5.1	5.2	4.9	14.9	12.4							8.19	31.1	0.262855	6.3	6.1	8.1	8.9	6.6	6.4	7	8.3	7.2	7.8	8.9	8.1	6.3	6.3	9.3	9.2	6.2	6.1		7.5
5.19	5.1	4.9	31.3	11.7	6.3	5	8.3	6.4	6.5	5.4	11.7	5.4	4.8	4.9	6.4	4.8	4.8	4.9	14.5	12.5							8.28	31.3	0.268664	6.2	6.1	8.2	7.4	6.2	6.5	6.8	8.7	8.1	6.4	9.5	8.1	6.3	6.9	9.2	8.1	6.1	6.2		8.1
5.2	5	4.9	31.1	11.7	5.5	4.9	7.4	5.8	7.1	5.6	11.7	6.3	4.9	4.8	6.2	4.8	5	5	14.5	11.9							8.205	31.1	0.263819	6.2	6.3	7.8	8.1	6.3	7.1	6.5	8.5	8.1	7.6	8.1	7.8	6.3	6.8	9.2	8.5	6.1	6.4		8.1
5.21	5.1	4.8	30.7	11.7	6.4	4.9	7.3	5.6	6.4	6.3	11.7	5.3	4.7	4.9	6.4	5.1	5	4.8	14.4	12.9							8.22	30.7	0.264784	6.5	6	8.1	8.2	6.3	6.4	6.8	8.8	7.2	6.8	8.3	7.9	6.3	6.4	9.5	9.5	6.3	6.1		7.3
5.22	4.9	4.9	30.6	11.7	7	5.1	7.4	5.6	6.5	6	11.7	5.3	5	4.8	5.3	5.3	5.1	4.8	14.9	12.4							8.215	30.6	0.264462	6.4	6	9.3	8.4	6.8	6.4	6.3	8.2	8	6.4	8.1	8.1	6.4	8	9.2	9.4	6.1	6.2		6.9
5.23	4.9	4.9	30.4	11.2	6.5	5.5	7.3	5.3	7.1	6.4	11.8	5.2	4.8	5	5.7	5.1	5.1	4.8	14.4	12.3							8.185	30.4	0.262534	6.3	6	8.8	8.1	6.3	6.5	6.4	8.1	7.2	7	8.4	7.1	6.5	6.6	9.2	9.2	6.1	6.2		6.3
5.24	4.8	4.8	30	11.2	5.8	5.2	6.4	6.6	6.6	6.5	12.3	5.4	5.1	4.9	5.5	5.1	5.4	4.8	15.4	11.7							8.175	30	0.261893	6.1	6.2	9.3	7.3	6.6	6.4	6.2	8.3	9.2	6.5	8.1	7.1	6.5	6.3	6.9	8.3	6.2	6.2
5.25	4.9	4.7	30.2	11.8	5.4	5	5.9	5.7	5.6	6.5	11.8	5.1	4.9	4.8	5.4	5	5.1	4.7	15.3	11.7							7.975	30.2	0.249236	6	6.1	9.4	7.7	6.9	6.2	6.9	9.2	8.1	6.6	6.8	7.1	6.2	6.5	8.1	8.2	6.1	6.2
5.26	4.9	4.9	29.5	11.1	5.6	5.1	5.1	6	5.2	6.5	11.7	5.7	4.9	4.9	5.8	5	5.1	4.8	15.8	11.1							7.935	29.5	0.246742	6.3	6.2	9.2	8.1	6.4	6.4	6.4	9.2	7.1	8	8.2	7.3	6.2	6.3	8.2	8.2	6.2	6.1
5.27	4.9	5.7	30.7	11.3	5.3	5.1	5.3	6.2	6.4	6.3	11.8	5.2	4.8	4.8	5.4	5.1	4.9	5	15	11.1							8.015	30.7	0.251742	6.3	6.2	8	9.5	6.2	6.2	6.5	8.1	7.8	7.9	8.1	7.7	5.9	6.5	8.2	8.1	6.1	6.2
5.28	4.9	5.1	30.2	10.6	4.9	5.1	5	6.3	5.5	5.6	11.7	5.9	4.8	5.1	5.1	5	4.9	5	14.9	11.8							7.87	30.2	0.242716	6.4	6.2	9.2	9.4	6.3	6.5	6.5	8.2	7.7	7.6	9.1	8.1	6.1	6.9	8.3	8.9	6.3	6.1
5.29	4.8	5.1	30.2	10.5	5.1	5	5.2	5.5	5.4	5.5	11.8	5.1	4.8	4.9	4.9	5.9	4.7	4.8	14.1	11.2							7.725	30.2	0.233854	6.4	6.1	9.3	9.2	6.4	6.2	6.4	9.2	8.1	7.1	8.3	8.2	6.4	6.9	8.1	8.3	6.3	6.1
5.3	4.8	5	30.7	10.4	5	5.2	5.2	5.8	7.4	6.3	12.5	5.5	4.9	5	6.5	5.1	4.7	4.8	14.1	11.7							8.03	30.7	0.252685	6.5	6.1	8.3	9.4	6.2	6.4	6.3	9.3	8.9	7.9	8.3	8.3	6.3	6.6	8.3	8.5	6.1	6.2
5.31	5	5.1	29.7	8.9	5.3	5.1	5.1	5.7	7.3	6.1	12.9	5.2	5	4.9	5	5.1	4.7	4.8	13.5	11.2							7.78	29.7	0.237196	6.3	6	9.2	9.2	6.8	6.3	7	7.4	7.1	7.1	8.1	8.1	6	6.8	6.5	8.9	6.2	6.2
5.32	4.8	5	29.2	9.8	5.5	5.1	5.2	6.4	6.5	5.6	13.5	6.2	4.8	5	5.3	5.1	4.8	4.8	13.5	10.6							7.835	29.2	0.240562	6.4	6.1	7.7	9.5	6.4	6.5	7.1	8.2	7.2	7.3	7.7	8.2	6.1	6.3	6.8	8.1	6.1	6.3
5.33	4.8	5	29.3	10.5	5.1	5	5.2	5.8	7.2	6.3	12.9	5.1	4.8	4.9	5.3	4.9	4.8	5	12.9	11.2							7.8	29.3	0.238417	6.3	6.1	8.3	8.2	6.3	6.2	6.9	8.3	8	6.8	7.6	8.2	6.2	6.3	8.1	8.7	6.2	6.2
5.34	5	5.9	28.8	9.8	5.5	5.1	5.1	5.8	7.3	6.1	13.5	5.3	4.9	4.8	6.3	5.1	4.7	4.7	12.3	10.4							7.82	28.8	0.239642	6.3	6.1	8.1	9.2	6.4	6.5	7	7.8	7.9	8.2	8.2	7.4	6.3	6.8	7.1	8.4	6.2	6
5.35	4.9	5.1	28.3	8.9	5.5	6.4	5.2	5.5	7.3	6.2	12.9	5.3	5	4.9	5.4	4.9	4.9	4.9	12.5	10.5							7.725	28.3	0.233854	6.3	6	7.4	8.1	7.1	6.4	8.6	8.1	7.1	7.6	8.3	7.1	6.2	6.3	6.5	8.5	6.1	6.1
5.36	4.9	5.1	28.4	9.8	5	5	5.1	6.3	7.2	6.2	13.5	5.8	5	4.8	6.1	5.1	4.7	4.9	12.4	10.2							7.775	28.4	0.236891	6.2	6.1	7.7	8.1	6.4	6.3	7	8.2	7.6	7.1	8.3	8.1	6	6.4	7	8.2	6.1	6.1
5.37	4.8	5.2	28.5	8.2	5.1	5.1	5.2	5.8	7.4	6.3	12.5	6.6	4.8	4.9	5.5	5.2	4.8	4.8	12.4	10.5							7.68	28.5	0.231138	6.2	6.1	7.3	9.2	6.4	7.3	6.8	9.2	7.1	7.3	8.5	7.8	6.1	6.3	7.7	8.8	6.1	6.2
5.38	4.8	5	28	9.2	4.9	5	5.2	6.3	7.4	5.9	11.8	5.3	5.1	5	6.7	5.1	4.9	4.8	11.7	9.9							7.6	28	0.226348	6.4	6.2	8.1	9.1	6.4	6.5	6.5	9.5	8.4	7.2	9.2	8	6.1	6.6	7.7	8.2	6.3	6
5.39	4.7	5.5	28	9.8	5.1	5.1	5.2	6.5	8.3	5.8	11.2	5.5	5.5	5	5.7	5.1	4.9	4.8	12.4	9.8							7.695	28	0.232042	6.2	6.2	9.2	9.2	6.3	6.3	6.5	9.2	8.3	8.3	8.4	7.6	6.2	7	7.1	9.4	6.2	6
5.4	4.9	5.5	27.5	9	5.1	5.5	5.2	6	8.4	5.5	11.2	5.1	5.3	4.9	5.7	5.1	4.9	4.9	11.8	8.9							7.52	27.5	0.221607	6.2	6.2	9.1	9.2	6.3	7	7	8.3	6.5	8.1	6.4	6.9	6.2	6.8	8.2	9.2	6.1	6.3
5.41	5	5	26.2	9.7	5.1	4.9	5.5	6	7.6	6.6	10.5	5.1	5.1	4.8	5.8	5.3	4.8	5.1	12.5	9.2							7.49	26.2	0.219843	6.3	6.2	9.4	9.2	6.2	6.4	6.9	8.1	7	8.4	6.6	7.5	6.2	6.3	8.2	9.2	6.3	6.4
5.42	4.7	5.1	27	9	5	5.3	5.1	6.5	8.2	6.5	11.2	6	5	5.1	6.4	5.1	4.8	5	12.4	9.7							7.655	27	0.229636	6.5	6.1	9.4	9.4	6.8	6.5	6.4	6.6	7.4	7.8	7.3	7.5	6.3	7	8	8.9	6.1	6.6
5.43	4.9	5	26.4	9	5.1	5.3	5.3	6.2	8.2	6.3	10.4	5.8	5.1	5.1	5.3	5.5	4.8	4.9	12.3	9.7							7.53	26.4	0.222197	6.4	6.1	9.2	9.1	6.5	6.8	6.6	6.4	7.5	7.2	7.6	7	6.3	6.8	8.1	8.1	6	6.5
5.44	4.8	5.5	25.1	9	5.5	5.1	5.1	5.8	9.1	6	10.4	5.2	5.1	5	5.2	4.9	4.8	4.8	11.7	9							7.355	25.1	0.211989	6.3	6.3	8.6	9.2	6.4	6.5	6.4	6.9	7.1	6.8	6.5	8.3	6.1	6.9	8.3	7.1	6.3	6.4
5.45	4.8	5.1	24	8.2	5.1	5.4	5.2	6.4	9.9	5.7	10.5	5.3	5.1	4.8	5.3	5.1	5	4.8	12.8	8.3							7.34	24	0.211126	6.6	6.3	8.1	8.3	6.3	6.3	7.1	7.3	6.9	7.7	7.9	8.1	6.1	6.5	7.3	7.5	6.2	6.2
5.46	4.7	5.1	21.9	8	5	5.1	4.9	6.3	10.5	5.3	10.5	6.6	5.1	4.8	5.8	5.3	4.8	4.8	11.7	8.4							7.23	21.9	0.204845	6.3	6.2	8.3	8.1	6.5	6.8	6.4	6.9	7.1	8.1	7	8.5	6.2	6.4	8	6.5	6.1	6.6
5.47	5.1	5.7	21.1	7.8	5.1	5.2	5.2	6	10.5	6.4	10.5	5.5	4.9	5.1	5.8	5.5	4.8	4.9	11.7	8.3							7.255	21.1	0.206264	6.1	6.1	8.1	8.2	6.6	6.4	6.8	6.8	8.2	7.4	7.1	7.2	6.2	6.4	8	8.2	6	6.5
5.48	4.8	5	19.5	7.7	5.1	6	5.2	5.5	10.4	6.5	10.5	6.3	5.5	4.8	5.6	5.2	4.9	4.8	11.7	9.7							7.235	19.5	0.205128	6.5	6.3	8.1	8	6.5	8.1	6.8	7.6	7.1	7	6.5	8.3	6.1	6.3	8.1	8.3	6.1	6.4
5.49	4.7	5	19.4	8.2	6.2	5.2	5.1	5.8	10.6	5.8	11.1	5.5	5.4	4.8	6.2	5.4	4.9	4.9	11.2	9.1							7.225	19.4	0.204562	6.6	6	8.1	7.2	7	6.6	6.4	8.1	7.3	6.4	6.9	8.2	6.1	6.4	8.1	8.1	6.2	6.4
5.5	4.8	5.1	19.2	8.1	5.1	5.1	5.1	6.3	10.5	6.6	11.2	5.4	5.1	4.9	5.4	6	4.8	4.7	10.5	9.1							7.15	19.2	0.200337	6.4	6.1	7.2	6.9	8.2	6.6	7.4	7.3	7	6.8	6.5	8.2	6	6.5	8.1	8.3	6.2	6.5
5.51	4.8	5.1	17	8.2	5.1	5	5.2	5.6	11.9	6	11.7	6.3	5.2	4.9	5.5	5.1	4.9	4.9	10.4	9							7.09	17	0.196989	6.3	6	8.3	7.7	6.5	6.3	6.8	7	8.5	6.4	7.4	8.1	6.2	6.5	7.2	7.1	6.2	6.3
5.52	4.9	5.1	17.1	8.1	5	5.1	5.2	6.3	11.2	6.3	11.8	6.6	5.2	4.8	5.6	5	4.7	4.9	9.9	9.8							7.13	17.1	0.199218	6.3	6.2	6.4	8.1	6.4	6.5	6.2	7.2	6.6	7.7	6.5	8.3	6.3	6.3	9.3	6.6	6	6.8
5.53	5	4.8	15.8	7.7	5.1	4.9	5.5	6.5	11.7	6	11.8	5.8	5.2	5	5.5	5.1	4.9	4.8	8.3	9.8							6.96	15.8	0.189831	6.3	6.1	6.2	7.6	6.4	7.4	6.6	6.6	6.3	6.8	6.5	7.1	6.8	6.3	7.5	8.1	6.3	6.4
5.54	4.8	4.9	14.2	7.2	5	5.1	5	6.3	11.7	6.5	11.7	6.2	5.1	4.7	6.3	5.5	5	4.8	8.2	10.5							6.935	14.2	0.18847	6.4	6.1	6.3	8.1	6.4	6.8	6.3	6.8	7.1	8	6.6	8.1	7.7	6.4	7.1	7.2	6	6.5
5.55	4.8	4.9	14.5	7.3	4.9	5.8	5.4	5.9	12.4	6.4	11.8	5.3	5.1	4.8	5.1	6.3	4.8	5	7.3	9							6.84	14.5	0.183342	6.5	6.2	8.3	8.3	6.9	6.9	6.5	6.9	7.1	7.7	6.5	8.1	6.9	6.5	7.1	8.1	6.1	6.4
5.56	5.1	4.9	14	7.4	4.9	5.9	4.8	6.3	11.7	6.4	11.3	5.4	5.7	4.9	5.4	5.5	5	4.7	8.3	9.8							6.87	14	0.184953	6.5	6	6.4	8.2	6.2	7.1	6.4	6.6	7.1	6.4	6.4	7.1	8.6	6.3	7.4	8.1	6.1	7.9
5.57	4.7	5.1	12.9	7.3	4.9	6	5.1	6.4	11.7	6.3	11.7	5.5	5.1	4.9	6.1	5.1	4.8	4.8	8.3	8.9							6.78	12.9	0.180139	6.3	6.2	6.5	6.8	6.6	7.1	7.5	6.5	7.6	7.6	6.3	7.1	8.2	6.3	7.7	7.1	6.1	7.1
5.58	4.7	5.3	11.7	7.3	5	5.6	5	6.4	11.7	5	11.9	5.9	5.8	4.8	7.2	5.1	4.9	4.8	9	9							6.805	11.9	0.18147	6.2	6.2	6.6	6.8	7.5	6.6	7.3	7	7	8.1	6.5	8.1	8.6	6.5	7.1	8.2	6.2	7
5.59	4.9	5	11.7	6.7	5.1	5.7	5.3	5.1	12.4	6.1	11.9	6.1	5.1	4.8	5.6	5.1	5	4.9	8.3	8.3							6.655	12.4	0.173558	6.4	6	7.1	6.4	7	6.5	6.8	6.8	6.8	7.2	6.8	7.6	8.1	6.5	6.4	7.1	6.2	6.5
5.6	4.8	5.3	11.2	7.4	4.8	6.3	6	5.3	12.4	6.1	12	5.8	5.4	4.9	5.5	6.4	4.8	4.8	8.2	8.2							6.78	12.4	0.180139	6.5	6.2	8.1	6.2	6.6	7.1	6.8	7.2	7.1	7.4	6.4	8.1	8.3	6.4	7.7	8.1	6.1	6.6
5.61	4.7	5	10.5	7.3	4.8	5.5	5.5	5.8	12.4	6.4	12	5.5	5.5	5	5.4	5.5	4.8	4.7	8.1	7.3							6.585	12.4	0.169926
5.62	4.8	5	10.5	7.3	4.8	6.6	5.2	5.7	11.7	6.5	11.9	5.5	5.1	4.8	5.2	5.4	4.6	4.9	8.2	7.3							6.55	11.9	0.168125
5.63	4.8	4.9	9.7	7.3	4.8	5.9	5.1	6.5	12.3	6.6	12.5	5.8	5.1	4.8	5.3	5.5	4.9	4.8	8.3	7.4							6.615	12.5	0.171478
5.64	4.9	5	10.4	6.6	4.8	6.5	5.1	5.5	11.9	6.4	12.4	5.8	5.1	4.9	5.3	5.6	5.2	4.8	8.1	8.2							6.625	12.4	0.171997
5.65	4.7	5.1	9.8	7.2	4.8	6.3	5.2	6.5	12.9	6.5	11.7	5.6	5	4.9	6.2	5.5	5.2	5	8.9	7.4							6.72	12.9	0.176965
5.66	4.9	5.1	9.1	7.4	4.9	5.6	5.8	6.3	12.4	6.6	12.4	5.5	5	4.9	5.2	6.3	5.3	4.8	9	8.2							6.735	12.4	0.177756
5.67	5	5.1	9.1	6.6	5	7.1	5.3	6.3	12.5	6.4	12.5	5.4	5.1	4.7	5.6	5.5	5.1	4.7	9.7	8.2							6.745	12.5	0.178284
5.68	4.8	5.1	9.1	6.5	4.8	7	5.1	6.3	11.8	6.8	11.7	5.5	5.1	4.9	5.5	6	6.1	4.9	9.9	7.2							6.705	11.8	0.176176
5.69	4.8	5	8.3	7	4.7	6.3	5.2	5.9	11.9	5.8	12.9	5.9	5.1	4.8	5.5	5.5	5.1	4.8	9.1	7.2							6.54	12.9	0.167612
5.7	5	4.9	7.4	7	4.8	6.4	4.8	6.4	11.8	6.7	12.3	5.8	5.2	4.8	6.2	6.2	5	4.8	8.8	7.3							6.58	12.3	0.169668
5.71	4.9	4.9	8.1	7.5	4.8	6.5	5.1	5.8	12.4	5.7	12.9	6.5	5	4.8	5.3	5.1	5.5	4.8	8.3	7.3							6.56	12.9	0.168638
5.72	5	5	8.2	7.3	4.9	6.3	4.6	5.8	11.7	6.3	12.4	5.5	5	5	5.4	6	6.3	4.8	8.2	7.4							6.555	12.4	0.168381
5.73	5	5.1	8.2	7.3	4.8	6.3	5.1	6.3	11.8	5.8	12.4	6.5	5.1	4.8	5.5	5.7	5.1	4.9	7.2	7							6.495	12.4	0.165313
5.74	4.7	5.1	8.3	7.3	4.8	7.2	4.9	5.8	11.8	5.8	12.5	5.2	4.9	4.7	5.3	6.4	5.2	4.8	7.2	7.3							6.46	12.5	0.163536
5.75	4.9	5.1	8.2	7.3	4.9	5.4	5	5.9	11.8	6.5	13.6	5.8	5.1	4.9	5.3	5.8	4.9	5	7.1	7.3							6.49	13.6	0.165059
5.76	4.9	4.9	9.8	7.3	4.8	5.4	4.8	6.5	11	6.5	12.4	6.5	5.1	4.8	5.1	5.5	5	4.9	6.3	7.1							6.43	12.4	0.162021
5.77	5.1	4.9	8.9	7.3	4.8	6.2	5.1	6	11.9	5.4	13	5.8	5.1	4.8	6	5.3	5.1	5	5.5	7.3							6.425	13	0.161769
5.78	4.8	5.9	8.2	7.1	4.8	6.6	4.8	6.3	11.2	5.9	12.5	5.9	5	5	5.5	5.5	5.1	5.1	5.4	6.5							6.355	12.5	0.158263
5.79	4.9	5.2	8.2	6.4	4.8	6.3	5	6.8	10.7	5.4	12.9	6.5	5.2	4.9	5.1	5.8	5.1	6.3	6.1	6.3							6.395	12.9	0.160262
5.8	4.7	5	7.3	6.5	5	6.5	4.7	6.5	10.5	5.8	12.5	6.5	5	4.8	5	5.1	4.9	5.3	6	5.6							6.16	12.5	0.1487
5.81	4.9	5.1	7.2	7	4.7	6.5	5	6.6	11.1	6.5	13	6.5	5.1	4.8	5.4	5.2	5	5.5	6.3	5							6.32	13	0.156525
5.82	4.8	5.1	7.1	7.1	5	5.3	4.7	6.3	10.5	6.3	12.4	6	5.1	4.7	5.2	5.1	5.1	5.1	6.3								6.16842	12.4	0.149107
5.83	4.9	4.9	7.3	7.3	4.8	5.4	4.8	6.3	10.5	5.4	11.7	5.3	5.4	4.7	5.4	5.3	5.3	5.3	6.4								6.12632	11.7	0.147078
5.84	4.8	4.8	6.5	7.4	4.8	5.1	4.8	6.4	10.5	5.8	12.4	6.5	5.5	4.7	5.3	5.2	5.3	6	6.5								6.22632	12.4	0.151919
5.85	5	4.9	6.3	7.3	4.7	5.3	4.9	6.5	10.6	5.3	12.5	6.4	5.1	4.9	5.2	5.3	5.2	6.3	5.4								6.16316	12.5	0.148852
5.86	4.8	4.9	7.3	7.7	4.7	5.1	4.9	6.1	10.4	5.1	11.7	6.5	5.1	4.9	5.5	5.7	5.1	5.1	5.8								6.12632	11.7	0.147078
5.87	4.8	5	7.3	7.8	4.9	4.9	5	7	10.5	6	12.5	6.5	5.1	4.8	5.1	5.5	5.3	6.4	6								6.33684	12.5	0.15736
5.88	4.8	5	7.5	7.3	4.9	5	4.7	6.4	10.5	5.1	12.3	7.3	4.9	4.8	5.1	6.7	5.1	5.6	5.3								6.22632	12.3	0.151919
5.89	4.9	4.8	7.8	7.8	4.8	5.1	5	5.1	10.6	5.2	11.8	5.8	5.1	4.8	6.1	6.6	5.1	5.8	5.8								6.21053	11.8	0.151149
5.9	4.8	5.1	7.3	7.9	4.8	5	4.8	5.1	10.5	6.3	13	6.5	5.3	4.9	5.1	6	5.3	5.4	5.2								6.22632	13	0.151919
5.91	4.8	4.8	7.1	8.2	5.1	4.9	4.9	5.1	10.4	5.4	12.5	7.2	5.6	4.9	5.1	5.5	5.1	5.2	5								6.14737	12.5	0.14809
5.92	4.9	5	7.1	7.3	5.1	5.2	4.9	5.1	10.5	5.7	12.9	7.2	5.1	4.8	5.2	5.4	5	5.1									6.19444	12.9	0.150367
5.93	4.7	4.9	6.9	8.1	4.9	4.9	4.9	5.1	10.5	5.4	12.5	6.5	6.3	4.9	5	5.7	5	6									6.23333	12.5	0.152261
5.94	4.8	5.2	6.1	8.7	5	5.1	4.6	5.1	10.5	5.8	12.4	6.4	6.7	6.6	5.8	6	5.1	5.4									6.40556	12.4	0.160791
5.95	5	5	5.1	8.2	5.3	5.1	4.8	5	10.5	5.1	12.9	6.5	5.7	6.5	5	6.5	5.1	5.5									6.26667	12.9	0.153894
5.96	4.8	4.8	5.1	8.9	5.1	5.1	4.7	4.9	9.9	5.4	13	5.9	5.6	6.4	6.1	5.7	5	5.1									6.19444	13	0.150367
5.97	4.9	4.9	5	7.9	5.1	5.1	4.9	5.1	9.2	5.1	12.5	6.5	6.6	6.2	4.8	6.4	5.2	5.3									6.15	12.5	0.148217
5.98	4.8	4.8	5	8.2	5	5.1	4.8	5	9	5.9	12.3	6	6.2	5.5	5	5.6	5.2	5.4									6.04444	12.3	0.143173
5.99	4.8	4.9	5	8.3	5.1	5.1	5.1	5.1	9.3	5	11.8	6.4	6.5	6.5	6	5.3	5.2	5.4									6.15556	11.8	0.148485
6	4.7	5	5	7.3	5	5.4	5	5.1	9.6	5.1	12.4	6.3	6.4	5.7	5.5	5.2	5	5.3									6.05556	12.4	0.1437
6.01	4.9	5	5.1	8.3	5	5	6.5	5.1	8.5	4.9	12.5	5.8	6.5	5.8	5.2	6.3	4.9	5.3									6.14444	12.5	0.14795
6.02	4.7	5.1	5.1	7.3	5.1	5.1	5.8	4.9	8.9	5.2	11.7	6.5	6.3	6.5	5.1	5.5	5	5.5									6.07222	11.7	0.144492
6.03	4.8	4.9	5.1	8.2	5.1	5.1	5.4	5.2	8.2	5.1	11.7	6.7	6	6.3	5	5.5	4.9	5.1									6.01667	11.7	0.14186
6.04	4.9	5	5	7.4	4.8	5.1	5.1	5.1	8.2	5.1	11.7	6.4	6.5	6.3	5	5.5	5.3	5.2									5.97778	11.7	0.140032
6.05	4.9	4.9	5.1	8.2	5.1	5	5.9	5.1	7.6	5.1	11.7	5.2	6.4	6.3	5.3	5.5	5.1	5.1									5.97222	11.7	0.139772
6.06	4.8	4.8	4.9	7.4	5	5.5	6.5	5.4	8.7	5.2	12.4	6.4	7	5.2	5.4	5.1	5	5									6.09444	12.4	0.145552
6.07	4.7	5	4.9	7.3	5	5.1	5.3	5.2	8.1	5.1	12.4	5.9	7.1	6	5	5	5.5	5.3									5.99444	12.4	0.140814
6.08	4.8	5.1	5.1	7.4	5	5.3	5.1	5.1	7.7	5.1	12.4	5.8	6.3	7.1	5.4	4.9	5.2	5.1									5.99444	12.4	0.140814
6.09	4.8	4.9	5.1	8.3	5.5	5.4	5.2	5.1	7.7	5	12.4	6.3	7.3	6.4	5.8	5	5.1	5.2									6.13889	12.4	0.147682
6.1	4.9	5.1	5.1	9.1	5	5.1	5.1	5.1	7.3	5.1	12.5	5.9	6.5	6.3	5.2	4.8	5.1	5.1									6.01667	12.5	0.14186
6.11	5	5	4.8	9.9	4.8	5.1	5.8	5.1	7.3	5.1	13	5.4	6.4	7.2	5	4.7	4.9	5									6.08333	13	0.145021
6.12	4.9	4.9	5	8.9	4.8	6.5	5.2	5.1	6.5	5.5	12.5	5.7	6	6.1	5	4.8	4.8	5.1									5.96111	12.5	0.139253
6.13	4.8	5	4.9	9	5	6.5	5.1	5.1	6.5	5.4	11.8	6.3	6.5	6.4	5.1	4.8	4.8	5.1									6.00556	11.8	0.141337
6.14	4.8	5.1	4.9	8.2	4.9	7.1	5.3	5.1	5.9	5.4	11.8	5.4	5.8	6.5	4.9	4.9	5	5									5.88889	11.8	0.135899
6.15	4.9	4.9	5.1	8.3	5	7.3	5.5	5.1	6.4	5.8	12.4	5.5	6.2	6.5	5.1	5	4.9	5									6.05	12.4	0.143436
6.16	4.8	4.8	5.1	7.3	5	6.2	5.1	4.9	5.4	5.8	11.8	6.5	5.7	5.6	5.4	4.8	4.8	5.1									5.78333	11.8	0.131071
6.17	4.8	4.9	5.1	7.3	5.1	5.5	5.3	5.1	6	5.5	12.5	6.4	5.9	6	5.3	5	4.9	5.1									5.87222	12.5	0.135131
6.18	4.8	4.9	5	7.2	4.9	5.7	5.7	5.1	6.1	5.1	11.8	5.1	6.5	5.7	5	5.1	4.9	5.1									5.76111	11.8	0.130065
6.19	4.8	5	5.2	7.3	6	6.5	5.1	5.2	5.1	5.2	11.8	5.8	6.7	6.2	5.1	5	4.8	5.1									5.88333	11.8	0.135642
6.2	4.8	5.1	5.1	7.3	5.1	6.2	5.1	5.1	6.1	7.3	11.7	5.3	6.2	5.5	5	5.3	4.9	5.1									5.9	11.7	0.136412
6.21	4.9	5	5.1	7.3	5.1	6.5	5.5	5.1	5	6.5	11.8	5.4	6	6.3	5.2	5.1	4.9	5.1									5.87778	11.8	0.135386
6.22	4.9	4.9	5	7.4	5	5.7	4.9	5	5.1	6.3	11.8	5.6	5	6.3	5.1	5.1	5	5.1									5.73333	11.8	0.128814
6.23	5.1	5.1	5	7.1	5.1	6	5.3	5.1	4.9	5.1	11.7	5.3	4.9	6.3	5	5.3	4.8	5									5.67222	11.7	0.126083
6.24	4.9	5.1	5.1	7.3	5	5.7	5.4	5.1	5.1	6.4	11.8	5.6	5	5.2	5.1	5	4.9	5									5.70556	11.8	0.127569
6.25	4.7	5.1	5.1	6.4	5.1	6.5	5	5.2	5	6.3	11.7	6.4	4.8	5	4.9	5.1	4.9	4.9									5.67222	11.7	0.126083
6.26	4.8	5.1	4.9	7.2	5	6.4	5.5	5.1	5.2	6.5	11.4	6.3	4.8	5.1	5.1	4.9	4.9	5.1									5.73889	11.4	0.129064
6.27	4.9	5.1	5	7.3	5.3	6.6	5.1	5.2	5.1	5.7	11.7	6.3	5	5	5.1	4.9	4.8	5.1									5.73333	11.7	0.128814
6.28	4.8	5	5	7.1	4.9	5.8	4.9	5.4	5.2	5.5	11.7	6.2	4.9	5	5.1	4.8	4.7	5									5.61111	11.7	0.12338
6.29	5	4.9	5.1	7.8	5.4	5.6	5	5.1	5.1	6.3	11.8	5.6	4.8	5.1	5.2	4.9	4.7	5									5.68889	11.8	0.126825
6.3	4.9	4.9	5.1	7.3	5	5.5	5.1	5	5.1	5.5	11.2	6.5	4.8	5.1	5.1	5	4.9	5.1									5.61667	11.2	0.123625
6.31	5	4.9	5.1	7.3	5.1	6.8	5.1	5.3	4.9	6.4	11.8	5.5	4.8	5.2	5.4	5.2	4.9	5									5.76111	11.8	0.130065
6.32	4.8	4.9	4.9	7.3	5.5	6.3	4.8	5.1	5	6.5	11.7	6.6	4.8	5.1	5.2	5.1	4.7	4.8									5.72778	11.7	0.128564
6.33	5	5	4.9	7.4	5.5	6.2	5.2	5.1	5.1	5.2	11.8	5.1	4.8	4.8	5.1	5	4.8	4.9									5.60556	11.8	0.123136
6.34	4.9	4.8	5	7.2	5.4	5.6	4.9	5	5.1	5.7	11.8	5.1	5	5.1	5.5	4.9	4.8	4.8									5.58889	11.8	0.122405
6.35	4.9	5	4.9	7.3	5.1	6	5.3	5.7	5	5.1	11.8	5.2	4.9	5.1	6.3	5.4	4.8	4.7									5.69444	11.8	0.127072
6.36	4.9	4.9	4.9	8.1	5.3	6.3	5.3	4.9	5.1	5.5	12.5	6.3	4.9	5.1	5.1	5.3	5.1	4.8									5.79444	12.5	0.131575
6.37	4.9	4.8	4.9	7.4	5.4	6.3	5.3	5.1	4.9	5.2	11.7	5.9	5.1	5.1	5.1	5.5	4.8	4.7									5.67222	11.7	0.126083
6.38	4.8	4.9	4.9	7.2	5	7.1	4.9	5	5.1	5.8	11.9	5.8	5	5.1	5.2	5.4	4.8	4.8									5.70556	11.9	0.127569
6.39	4.8	4.9	5.2	7.2	5.1	6.5	5	5.1	5.3	5.2	11.9	6.2	4.9	4.9	5.8	6.1	4.8	4.9									5.76667	11.9	0.130316
6.4	4.8	4.9	5	7.3	5.8	5.2	4.9	5	5.1	5.1	11.9	5.8	5	4.9	5.2	6.1	5.1	4.8									5.66111	11.9	0.125589
6.41	4.9	4.7	4.9	8.1	5.1	5	5.3	5.2	4.9	5.2	11.8	6.5	4.9	4.9	4.9	5.2	4.7	4.9									5.61667	11.8	0.123625
6.42	4.8	4.8	5	7.3	5.1	5.1	5.1	5.1	5.1	5.1	11.8	6.5	5.1	5.1	5.1	6.5	4.8	4.8									5.67778	11.8	0.12633
6.43	4.8	4.7	5	7.4	5	5.2	5.5	5.1	5	5	11.7	5.9	5	5.2	5.4	5.5	4.9	5									5.62778	11.7	0.124115
6.44	4.9	4.9	4.9	7.4	5.2	5	5.1	4.9	5.1	5.5	11.9	5.8	5.1	5.1	5.2	6	4.9	4.9									5.65556	11.9	0.125343
6.45	4.8	4.8	5.1	7.4	5.1	5.3	5.1	5	5.1	5.2	11.9	6.3	5.1	5.5	5.2	6.3	4.9	4.8									5.71667	11.9	0.128066
6.46	4.8	5	4.9	7.3	5.2	5.4	4.8	5	5.3	5.5	11.8	6.3	5.1	5.1	5	6.5	5	5.3									5.73889	11.8	0.129064
6.47	4.9	4.8	5	7.5	5.2	5	5	5.1	5	5.1	11.8	5.5	5	5.1	5.1	5.8	4.9	5									5.6	11.8	0.122892
6.48	4.8	4.8	4.8	7.2	5	5.2	4.9	4.9	5.8	5.6	11.2	5.7	5	5.1	5.2	6	5	4.9									5.61667	11.2	0.123625
6.49	5	4.9	5	7.3	5.1	5.1	5.1	5.1	5.8	5.5	10.5	5.7	4.9	5.1	5.4	6.4	5.1	5									5.66667	10.5	0.125836
6.5	4.9	4.8	4.9	7.3	5	5.1	5	5.1	5.2	5.5	10.4	5.1	5	5.1	5.3	5.5	5.1	4.8									5.50556	10.4	0.118782
6.51	4.8	5	5	7.4	4.9	5.2	5.1	5.3	5.1	5.3	10.4	5.4	4.8	5.2	5.6	5.3	4.8	5									5.53333	10.4	0.119984
6.52	4.9	5.1	4.8	7.2	5.1	5.1	4.9	5.1	5	5.6	10.5	6.5	5.1	5.5	5.8	5	4.9	5									5.61667	10.5	0.123625
6.53	4.8	5	4.9	7.2	5.1	5.2	5.2	5.1	6.3	5.4	10.5	5.6	5.1	5.1	6.3	5.1	4.9	4.9									5.65	10.5	0.125097
6.54	4.7	4.9	4.9	7.1	5.1	5.3	4.8	5	5.1	5.6	11.1	5.3	5.5	5.3	5.5	5.2	5	5									5.57778	11.1	0.121919
6.55	4.8	4.7	4.8	7.2	5.4	5.6	5.1	5.3	5.2	5.5	10.5	6.4	5.4	5.7	6.4	5.2	4.8	4.9									5.71667	10.5	0.128066
6.56	5	4.9	5	7.2	5.1	5.1	4.8	4.8	5.7	6.3	10.4	5.3	5.2	6	6	5.6	4.7	5.1									5.67778	10.4	0.12633
6.57	5	4.9	4.9	7.3	5.1	5.1	5.1	5.1	6.3	5.1	10.4	5.5	6.1	5.5	5.1	5.2	4.8	5.1									5.64444	10.4	0.124851
6.58	4.7	5	4.9	7.3	6.4	5.1	4.9	5	5.3	5.1	10.4	5.5	5.5	5.5	5.1	5.4	4.8	5.1									5.61111	10.4	0.12338
6.59	4.8	4.9	4.8	7.3	5	4.9	5.2	5.1	5.5	6.1	9.8	5.1	5.4	5.2	5.5	5.1	5	5.1									5.54444	9.8	0.120466
6.6	4.7	4.6	5	7.3	4.9	5.4	5.1	5	5.7	5.1	10.5	7.1	5.6	6	5.1	5.6	5.1	5									5.71111	10.5	0.127817
6.61	5	4.9	4.9	7.4	5.1	5.1	5.1	5.2	6.3	5.2	9.9	6.1	5.7	5.1	5.2	5.1	4.9	5.1									5.62778	9.9	0.124115
6.62	5.1	4.8	5	7.3	4.9	5.1	5.1	5.1	5.4	5.5	9.9	6.6	6.4	5.5	5.7	5.1	4.9	4.9									5.68333	9.9	0.126577
6.63	4.9	4.9	4.9	7.3	5.1	5	5	5.2	5.5	6.4	9.8	6.8	5.3	5.4	5.1	5.5	5.1	4.8									5.66667	9.8	0.125836
6.64	4.8	5	5.1	8.7	4.9	5.1	5.7	5.1	5.3	5.4	9.9	5.2	5.8	6.8	5	5.1	4.9	4.9									5.70556	9.9	0.127569
6.65	4.9	4.9	4.9	7.9	5.1	5.8	5.1	5	5.1	5.6	9.8	5.1	5.3	6.4	4.9	5.3	4.7	4.9									5.59444	9.8	0.122649
6.66	5	4.8	4.9	8.2	4.9	5.3	5.1	4.9	5.1	5.7	9.8	5.1	6.4	6.5	5.2	5.6	4.9	4.7									5.67222	9.8	0.126083
6.67	4.8	4.8	4.7	7.7	5.1	5.1	5.1	5.1	5	5.7	9.2	5.4	5.1	6.7	5	5.8	4.8	5									5.56111	9.2	0.121191
6.68	4.8	4.7	4.9	7.4	5.7	5.1	4.9	4.9	5.7	5.2	8.7	5.8	4.9	6.4	5.1	5.1	5.1	4.9									5.51667	8.7	0.119262
6.69	4.8	5	4.7	7.2	5.5	5.2	5.1	5.2	5.5	5.1	9.5	5.6	5.7	6.4	5.6	5	4.8	4.9									5.6	9.5	0.122892
6.7	4.8	4.8	4.8	7.3	5.1	5.7	5.1	4.9	5.4	5.6	8.4	5.6	6.6	7.3	5.1	5.1	5	4.9									5.63889	8.4	0.124605
6.71	5.1	5	5	8	5.1	5.2	5.1	5.1	5.3	5.9	8.2	5.8	5.4	7.2	5.3	5.3	4.9	4.7									5.64444	8.2	0.124851
6.72	4.9	5	4.9	7.3	5.1	5.1	5.3	4.9	5.3	5.1	7.3	5.8	6.5	7.3	5.1	5.4	4.9	5.1									5.57222	7.3	0.121676
6.73	4.9	5	5.1	8.3	5.1	4.9	5.4	5	5.1	6.3	8	6	5.7	7.3	5	5.2	5.1	4.8									5.67778	8.3	0.12633
6.74	5	5	4.8	8.4	5.1	4.9	5.2	4.7	5.1	5.6	7.3	5.5	5.8	7.1	5	5.1	4.8	4.8									5.51111	8.4	0.119022
6.75	5.1	4.7	4.9	8.2	5.5	4.9	5.5	5.1	5.3	5.4	7.5	6.5	5.8	7.2	5.3	5.4	4.9	5.1									5.68333	8.2	0.126577
6.76	5.1	4.8	5.1	9	5.2	5.3	5.1	5.1	5.3	5.5	8.2	6.6	6.5	7.3	5.5	4.9	4.8	4.8									5.78333	9	0.131071
6.77	4.8	4.9	5	9	5.5	5.1	5.8	5.1	5.5	6	8	6	5.8	6.7	5	5.1	4.9	5									5.73333	9	0.128814
6.78	4.8	4.9	5.1	9.8	5.3	6.1	5.5	4.9	6.5	5.8	7.3	5.2	5.2	7.3	5.4	5.5	4.8	4.9									5.79444	9.8	0.131575
6.79	4.9	5.1	5	9.9	5.1	5.3	5.1	5.1	5.1	6.3	8.4	6.5	5.2	8.3	5.5	5	4.8	4.8									5.85556	9.9	0.134365
6.8	4.9	4.8	4.9	9.8	5.1	5.2	5.4	5.1	5.4	6.3	9.2	6.5	5.4	8.3	5.7	5	4.7	4.8									5.91667	9.8	0.137184
6.81	5	4.8	5.1	9.8	5.5	5.1	5.4	5.2	5.2	6.6	8.3	6.4	5.4	7.2	5.3	5.8	5	5									5.89444	9.8	0.136155
6.82	5	5	4.8	9	5	5.1	5.8	4.9	5.7	5.6	9.2	6.5	5.7	7.3	5.1	5.1	4.7	5									5.80556	9.2	0.13208
6.83	5	4.8	5	8.2	5.1	4.8	6.1	5.1	5.5	6.5	8.3	6.5	5.2	7.3	5.8	5	4.8	4.8									5.76667	8.3	0.130316
6.84	4.8	5	4.9	8.3	5.1	5.1	5.2	6.1	5.5	5.4	8.2	6.6	5.8	7.2	5.1	4.9	4.8	4.9									5.71667	8.3	0.128066
6.85	5.1	4.8	5	8.2	5	5.1	5.5	5.1	5.8	6.4	7.4	5.1	5.1	7.3	5.8	5	4.8	5									5.63889	8.2	0.124605
6.86	5.2	4.8	5.1	8.2	5.8	5.1	6.1	5.2	5.4	5.3	7.4	5.8	6	7.3	5.3	5.1	5	4.6									5.70556	8.2	0.127569
6.87	5.4	4.9	5.1	8.2	5.2	5.1	5.3	5.1	5.3	5.9	7.4	6.5	5.2	7.3	5.7	5.1	4.7	4.9									5.68333	8.2	0.126577
6.88	5.1	4.8	5	9.1	5.1	5.3	5.1	5.3	5.1	6	7.7	6.4	6.2	7.3	5.8	5.6	4.9	4.9									5.81667	9.1	0.132586
6.89	5	4.8	5.1	9.9	5	6	5.1	5.1	5	6	7.4	5.7	5.1	7.3	5.1	5.5	5	4.8									5.71667	9.9	0.128066
6.9	4.9	4.9	4.9	9.1	4.9	5	5.2	5	5.1	5.7	7.3	6.4	5	7.1	6.4	6	4.8	4.8									5.69444	9.1	0.127072
6.91	5	5.1	5	9.8	5	5	5.7	5.4	5.6	5.1	7.2	7.2	5.4	7.2	5.7	5.1	4.8	4.8									5.78333	9.8	0.131071
6.92	5	4.7	5	8.2	5	5.3	5.3	5.1	6.3	6.2	7.4	6.6	5.6	7.3	5.8	5	4.8	4.9									5.75	8.2	0.129564
6.93	5.1	4.8	5	8.2	5	4.9	5.8	5.1	5.7	6.3	7.2	5.7	5.9	7.3	5.6	5.5	5	4.7									5.71111	8.2	0.127817
6.94	5	4.8	5.8	8.2	5.1	5.1	5.1	4.8	5.5	5.6	7.4	7.2	6	7.3	5.4	5.1	4.9	4.8									5.72778	8.2	0.128564
6.95	5	4.9	5	7.4	5.1	4.9	5.2	5.1	5.1	6	7.3	6.3	5.8	7.3	5.2	5.1	5	4.9									5.58889	7.4	0.122405
6.96	4.9	4.8	5.1	7.2	5.1	5.2	5.7	4.9	5.1	6.2	6.5	5.6	6.4	7.3	5.3	5.7	4.9	5									5.60556	7.3	0.123136
6.97	5	5	5.1	7.3	5.1	5	5.8	5.1	5.5	5.5	6.6	5.8	5.8	7.3	5	5.4	4.8	4.9									5.55556	7.3	0.120949
6.98	5.1	4.9	5.1	7.3	4.9	5.1	5.5	5	5.6	7	6.3	5.4	6.3	7.4	5.5	5.1	4.8	4.9									5.62222	7.4	0.12387
6.99	5.1	4.8	4.9	7.1	5.3	4.9	6	5.2	5	6.3	6.4	5.1	5.8	8.1	5.4	5.7	5	4.8									5.60556	8.1	0.123136
7	5.1	4.8	4.8	7.3	4.8	5	5.2	5.3	5.4	6.3	6.4	5.1	5.6	7.3	5.1	5.8	4.9	4.9									5.50556	7.3	0.118782
7.01	5.1	4.8	5	6.5	5.1	5.2	5.8	5.2	5.5	6.4	6.3	5.5	5.8	7.2	5.3	5.2	4.9	4.9									5.53889	7.2	0.120225
7.02	5	4.8	4.8	6.6	4.9	5.1	5.1	5	5.5	5.3	6.6	5.2	5.3	8.3	5.7	5.5	4.9	4.8									5.46667	8.3	0.11711
7.03	5	4.9	4.9	6.3	4.8	5.3	6.1	6.5	5	5.5	5.2	5.2	5.6	7.3	6.3	5.7	5	4.9									5.52778	7.3	0.119743
[truncated: 36 more columns]
